# Supplementary material for: Direct functionalization of white phosphorus with anionic dicarbenes and mesoionic carbenes: facile access to 1,2,3-triphosphol-2-ides
Source: PubMed Central journal article supplement (PMC7069227; doi:10.1039/c9sc04441h), 2019-10-18
Supplement: SC-010-C9SC04441H-s001.pdf [file SC-010-C9SC04441H-s001.pdf]

*Electronic Supplementary Information (ESI)*

*for*

**Direct functionalization of white phosphorus with anionic  
dicarbenes and mesoionic carbenes: Facile access to 1,2,3-  
triphosphol-2-ides**

Dennis Rottschäfer, Beate Neumann, Hans-Georg Stammler, Sebastian Blomeyer, and Rajendra  
S. Ghadwal\*

Molecular Inorganic Chemistry and Catalysis, Inorganic and Structural Chemistry, Center for Molecular  
Materials, Faculty of Chemistry, Universität Bielefeld,  
Universitätsstr. 25, D-33615, Bielefeld, Germany.

E-mail: [rghadwal@uni-bielefeld.de](mailto:rghadwal@uni-bielefeld.de)

Homepage: [www.ghadwalgroup.de](http://www.ghadwalgroup.de).

**Contents:**

|                           |            |
|---------------------------|------------|
| Plots of NMR spectra      | p. 2 – 19  |
| UV-visible spectroscopy   | p. 20 – 22 |
| Infrared spectroscopy     | p. 23 – 26 |
| X-Ray diffraction studies | p. 27 – 35 |
| Computational details     | p. 36 – 60 |
| References                | p. 61      |

## Plots of NMR spectra

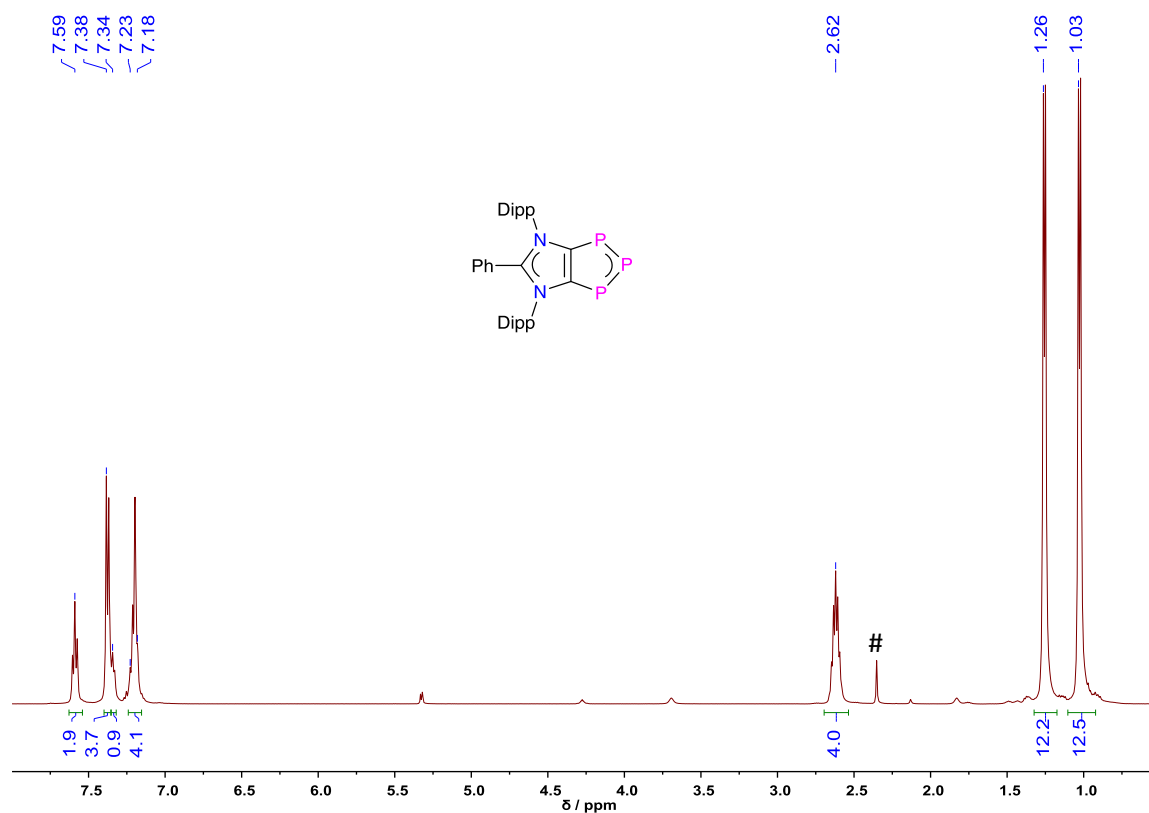

**Fig. S1**  $^1\text{H}$  NMR (500 MHz,  $\text{CD}_2\text{Cl}_2$ , 298 K) spectrum of compound **4a**. # = toluene.

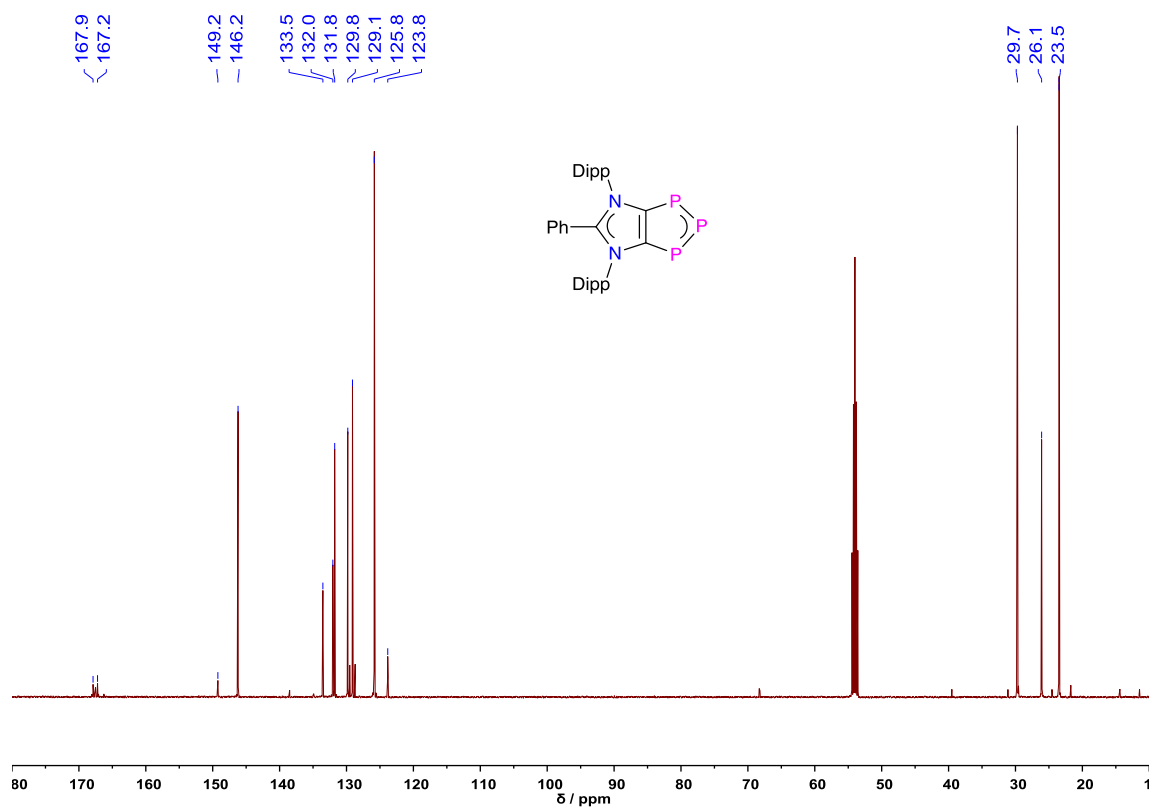

**Fig. S2**  $^{13}\text{C}$  NMR (125 MHz,  $\text{CD}_2\text{Cl}_2$ , 298 K) spectrum of compound **4a**.

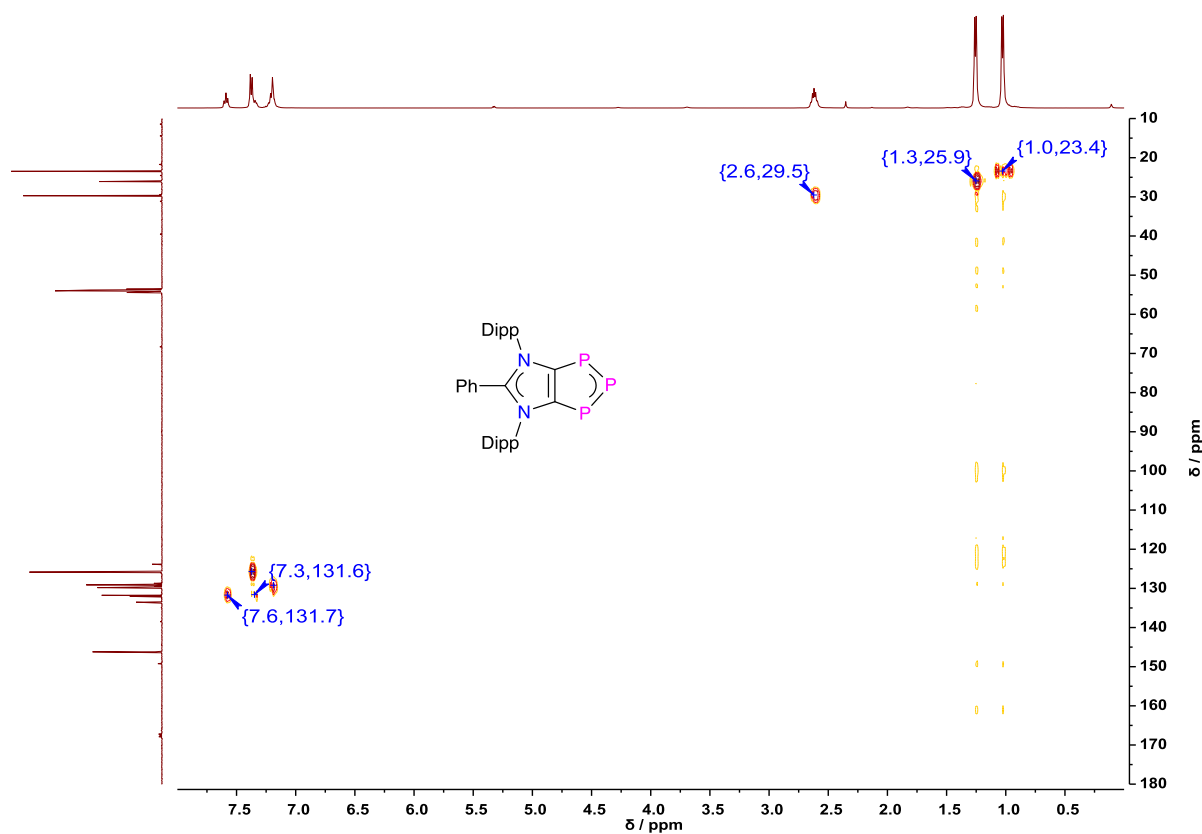

**Fig. S3**  $^1\text{H}$ - $^{13}\text{C}$ -HMQC (500 MHz,  $\text{CD}_2\text{Cl}_2$ , 298 K) spectrum of compound **4a**.

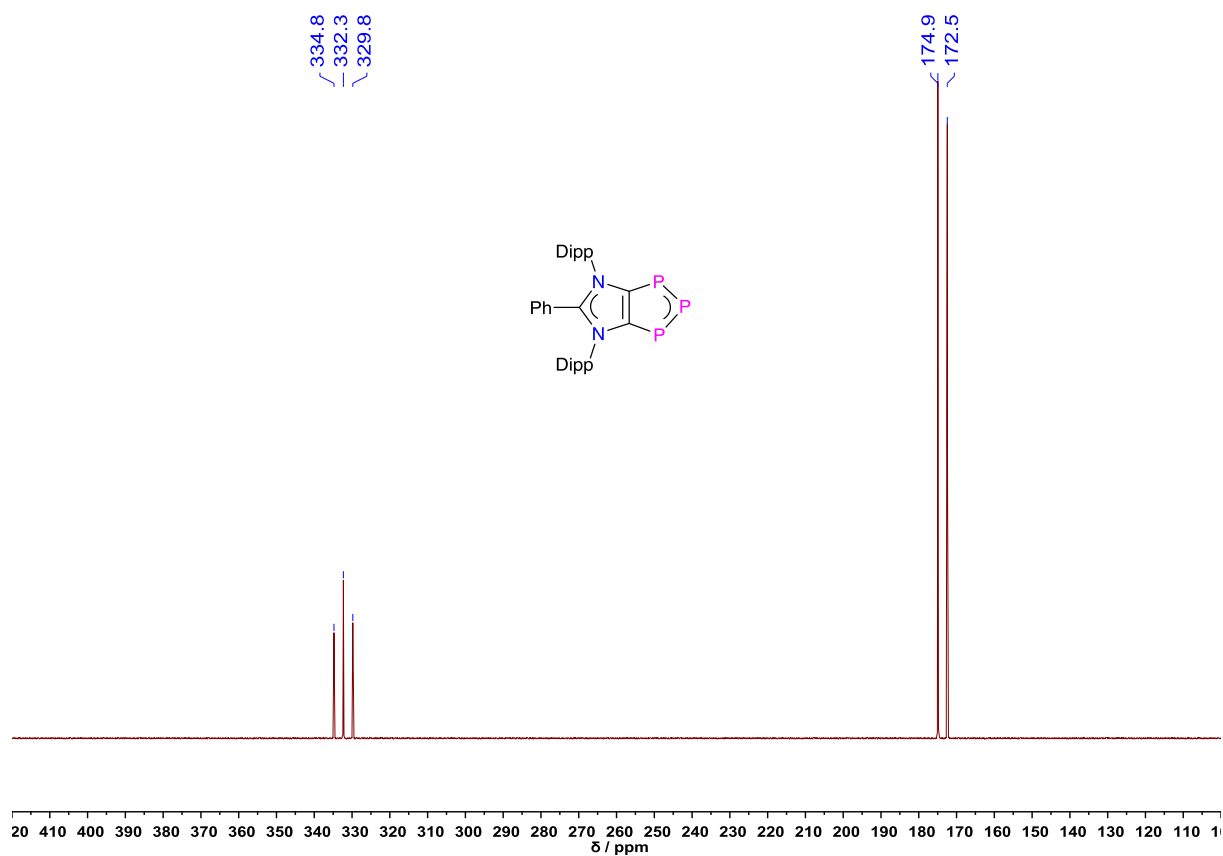

**Fig. S4**  $^{31}\text{P}\{^1\text{H}\}$  NMR (202 MHz,  $\text{CD}_2\text{Cl}_2$ , 298 K) spectrum of compound **4a**.

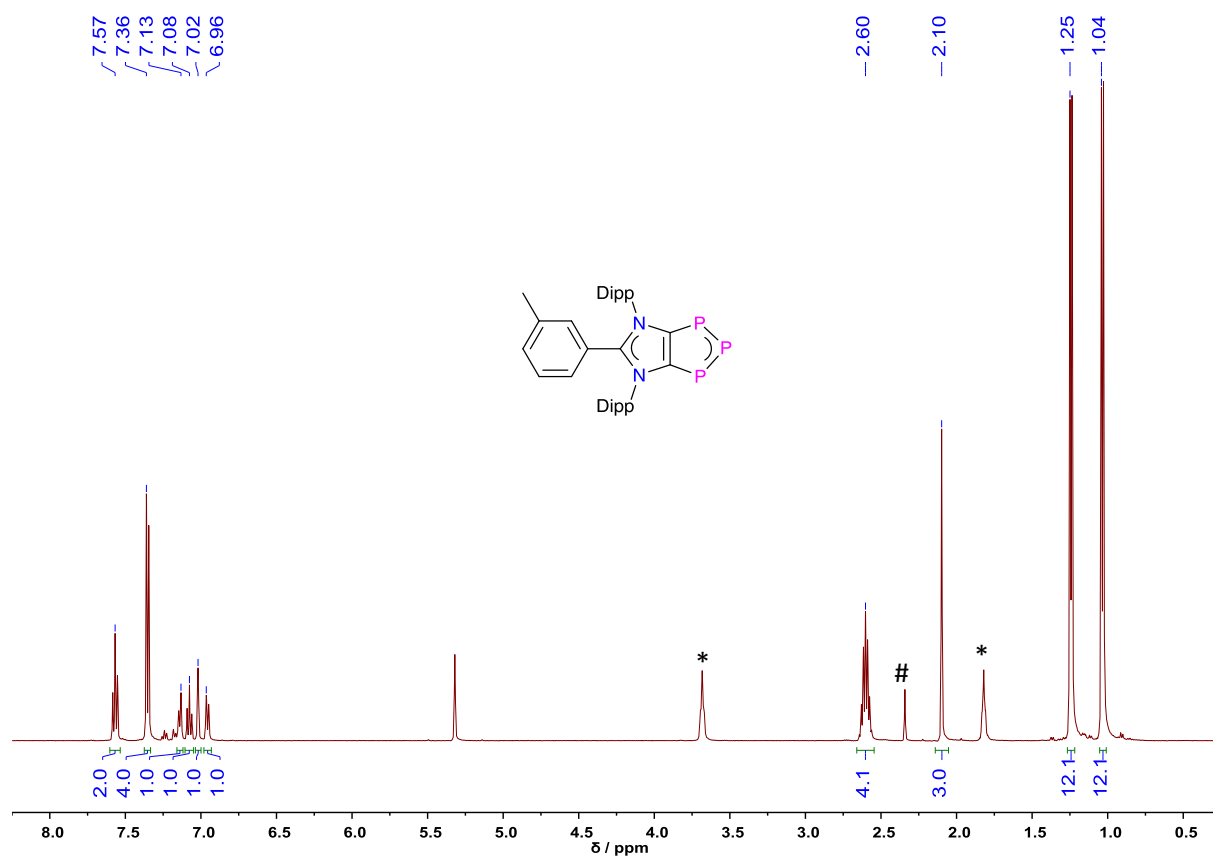

**Fig. S5** <sup>1</sup>H NMR (500 MHz, CD<sub>2</sub>Cl<sub>2</sub>, 298 K) spectrum of compound **4b**. # = toluene, \* = THF.

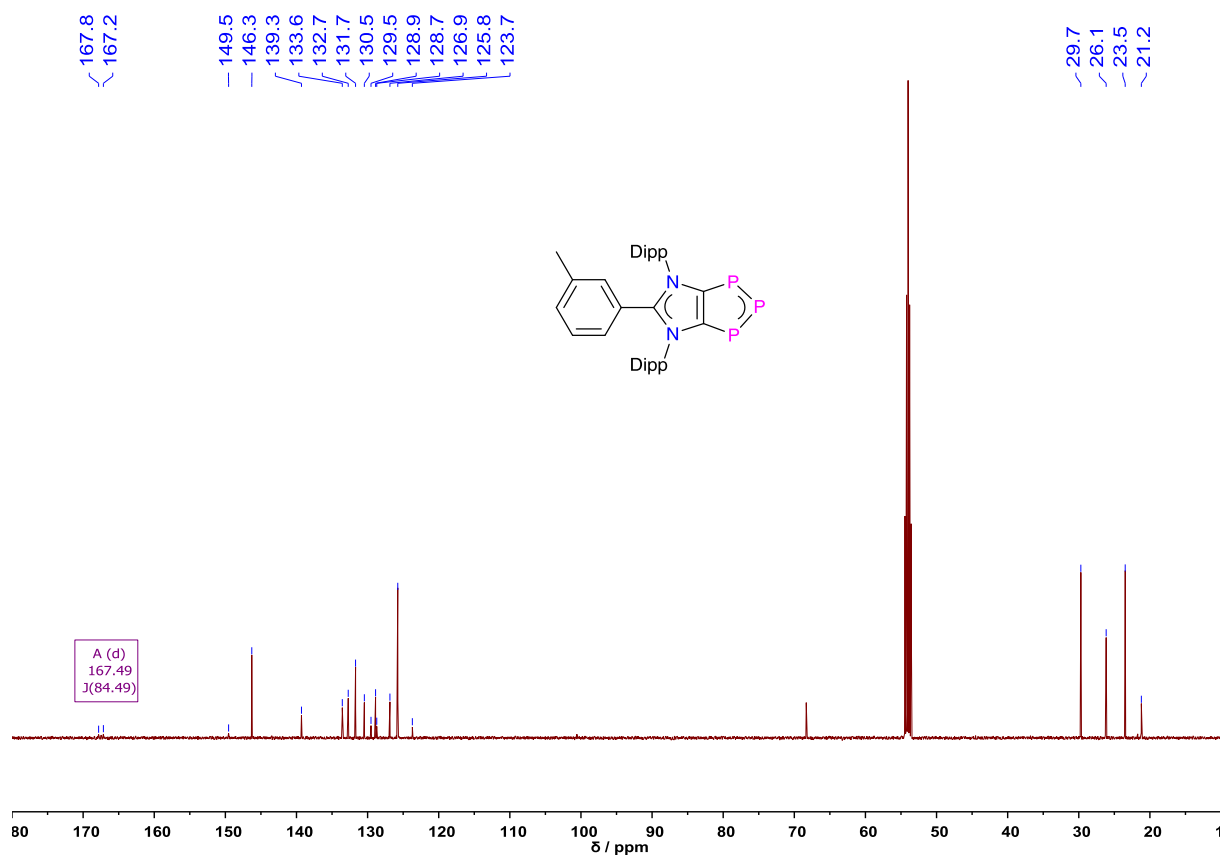

**Fig. S6** <sup>13</sup>C NMR (125 MHz, CD<sub>2</sub>Cl<sub>2</sub>, 298 K) spectrum of compound **4b**.

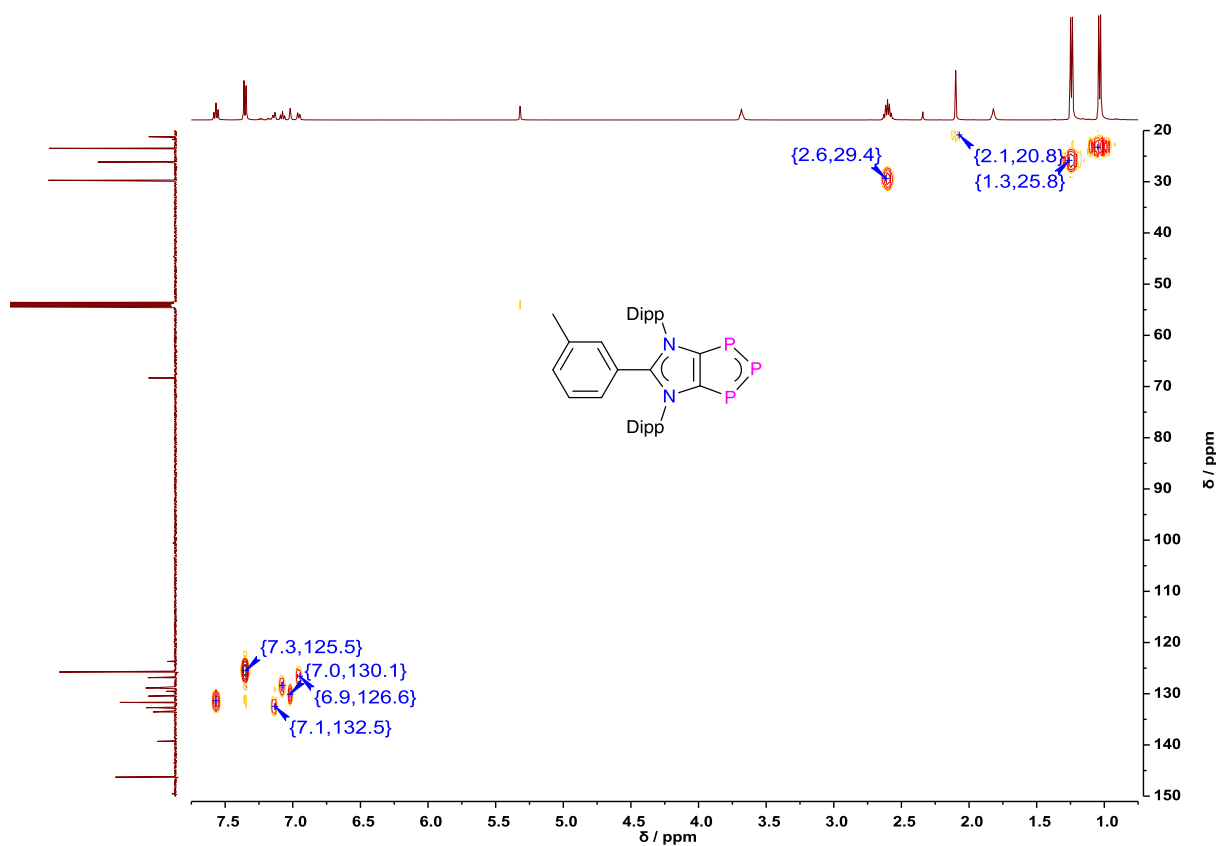

**Fig. S7**  $^1\text{H}$ - $^{13}\text{C}$ -HMQC (500 MHz,  $\text{CD}_2\text{Cl}_2$ , 298 K) spectrum of compound **4b**.

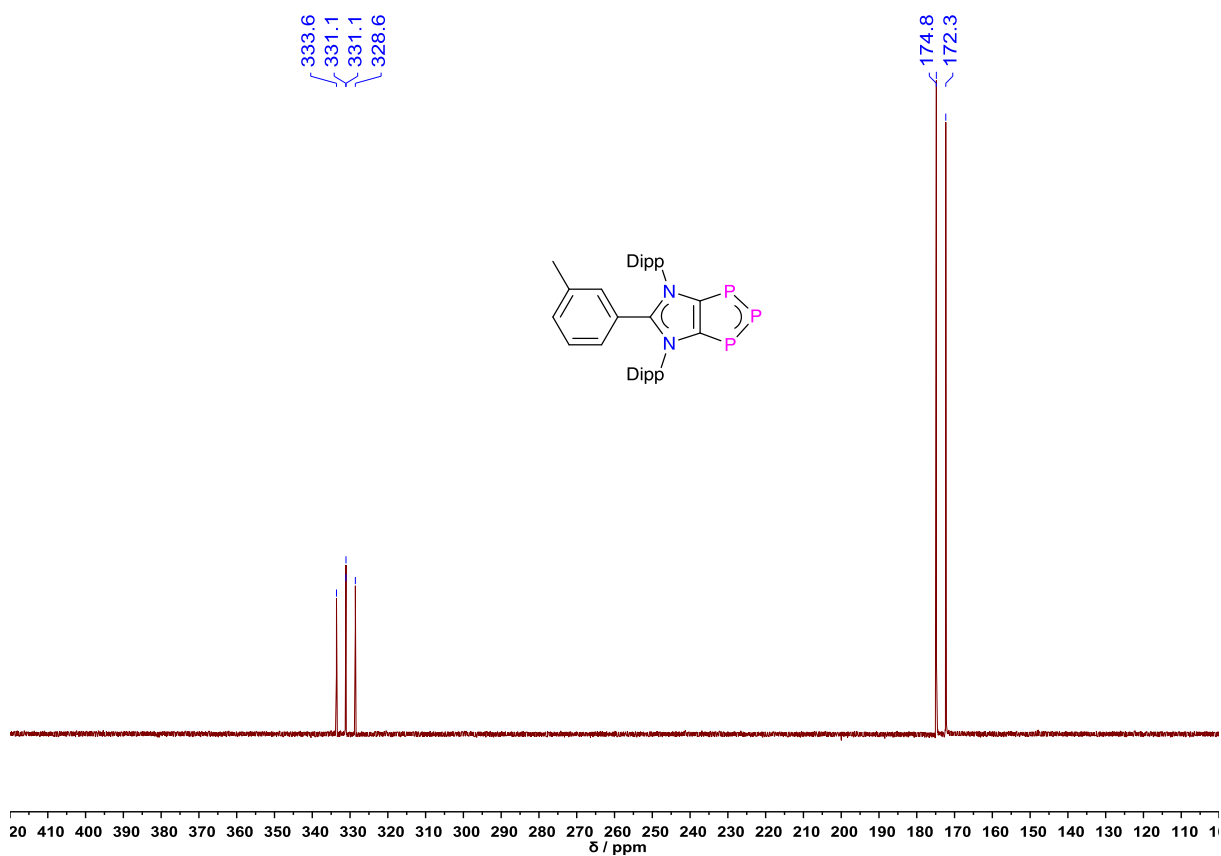

**Fig. S8**  $^{31}\text{P}\{^1\text{H}\}$  NMR (202 MHz,  $\text{CD}_2\text{Cl}_2$ , 298 K) spectrum of compound **4b**.

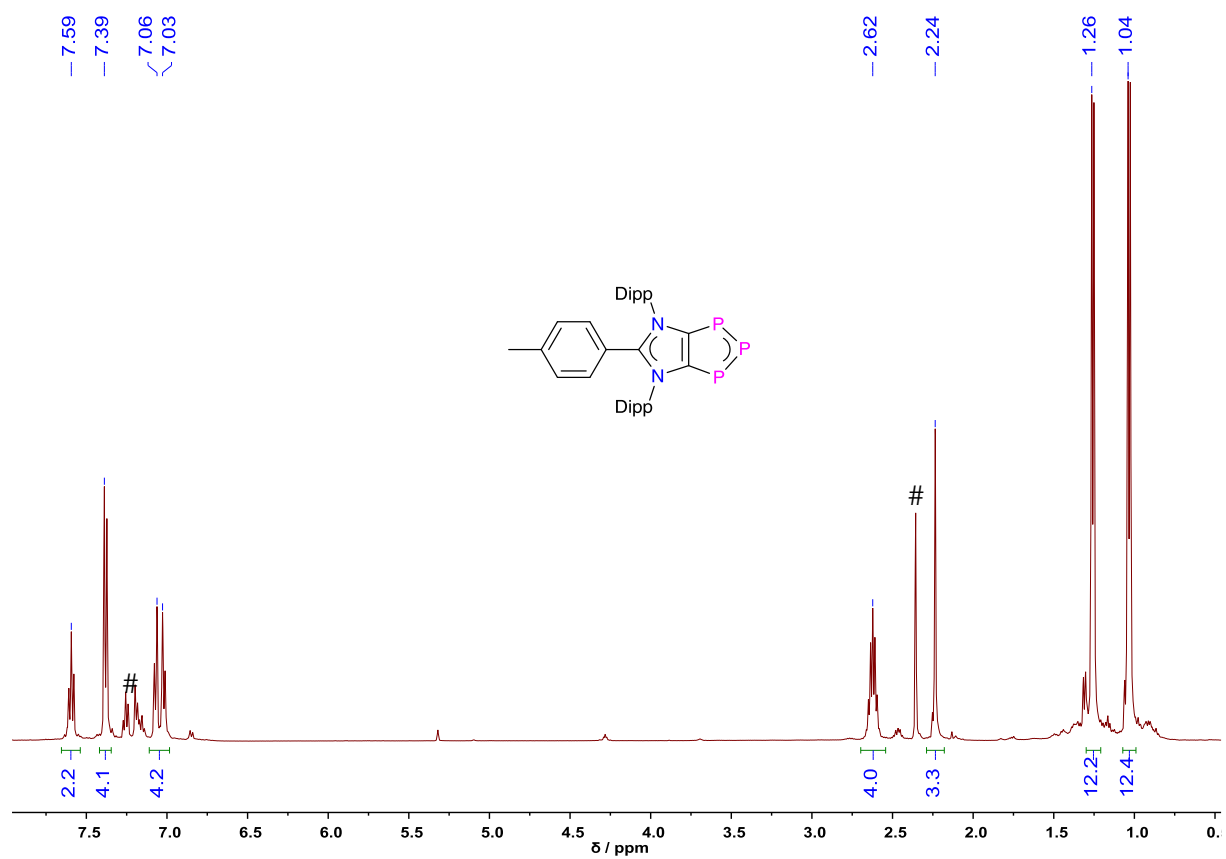

**Fig. S9**  $^1\text{H NMR}$  (500 MHz,  $\text{CD}_2\text{Cl}_2$ , 298 K) spectrum of compound **4c**. # = toluene.

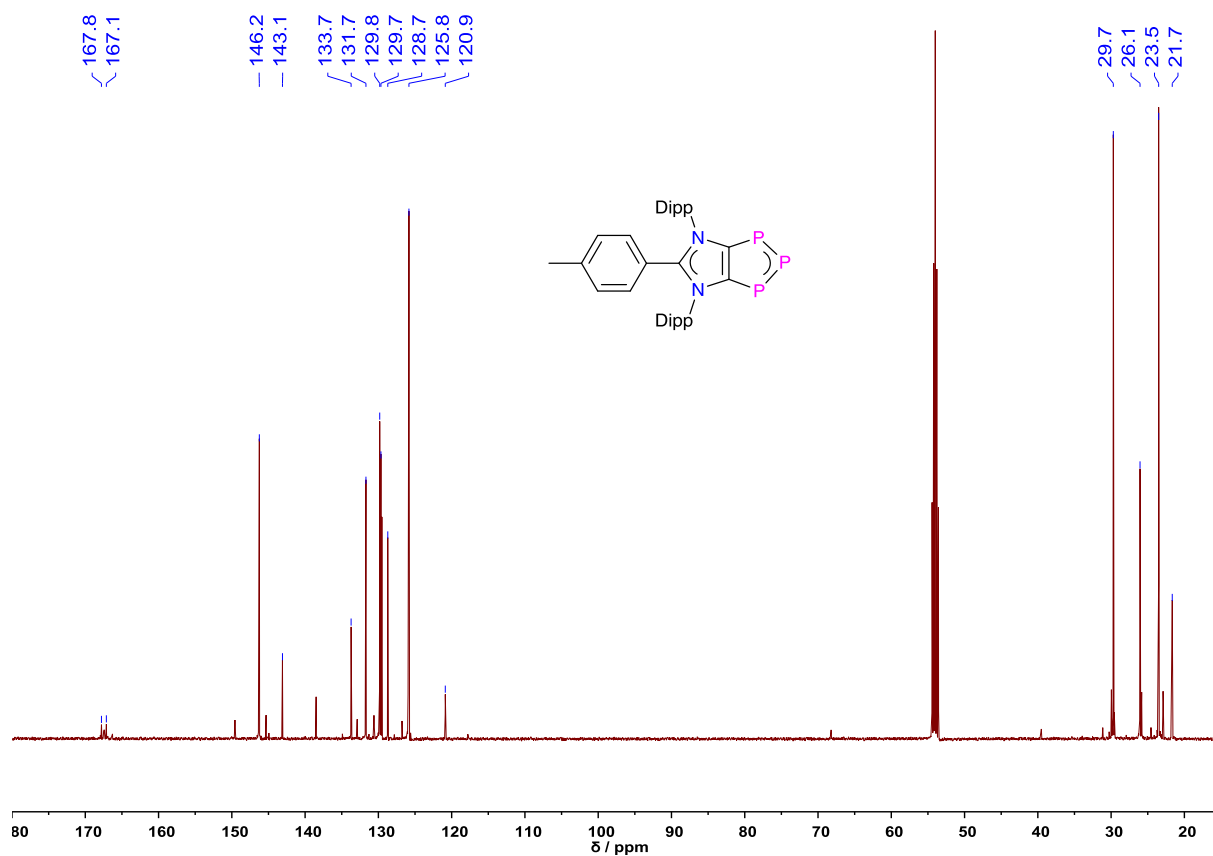

**Fig. S10**  $^{13}\text{C NMR}$  (125 MHz,  $\text{CD}_2\text{Cl}_2$ , 298 K) spectrum of compound **4c**.

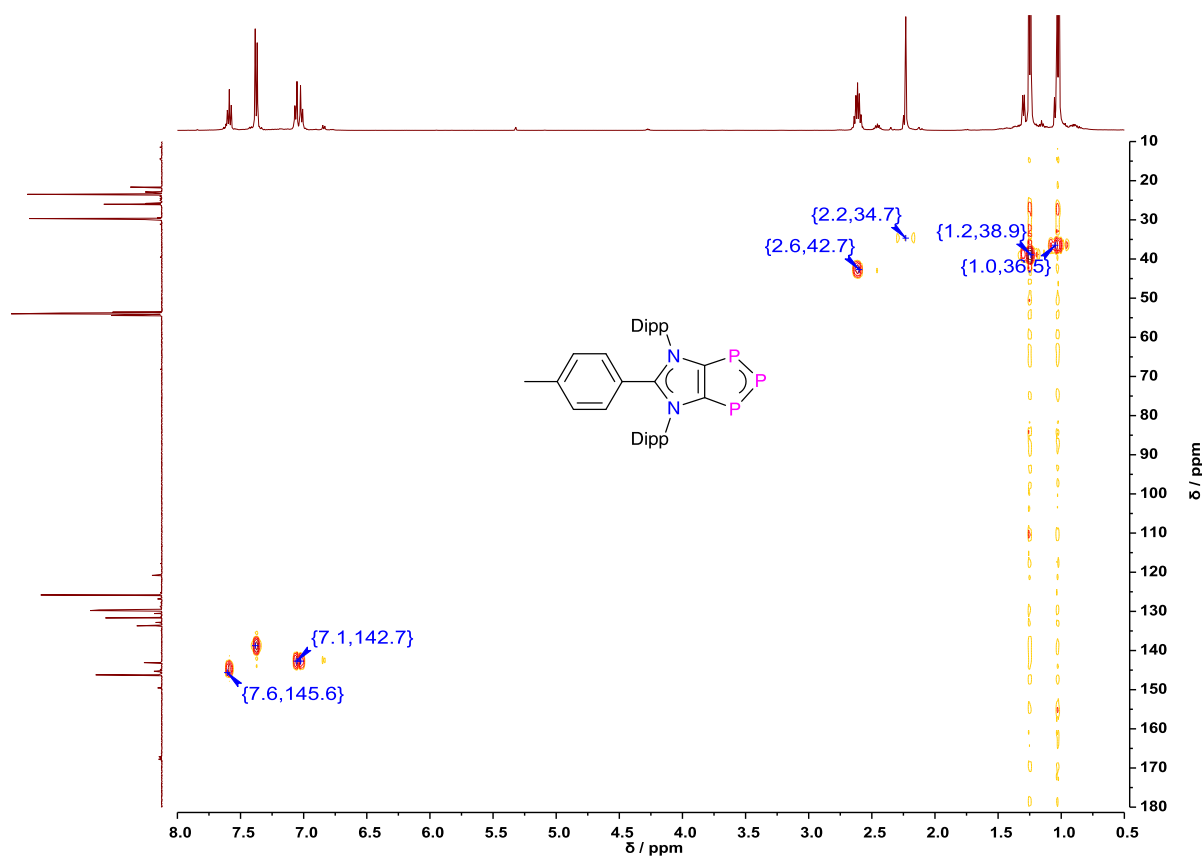

**Fig. S11**  $^1\text{H}$ - $^{13}\text{C}$ -HMQC (500 MHz,  $\text{CD}_2\text{Cl}_2$ , 298 K) spectrum of compound **4c**.

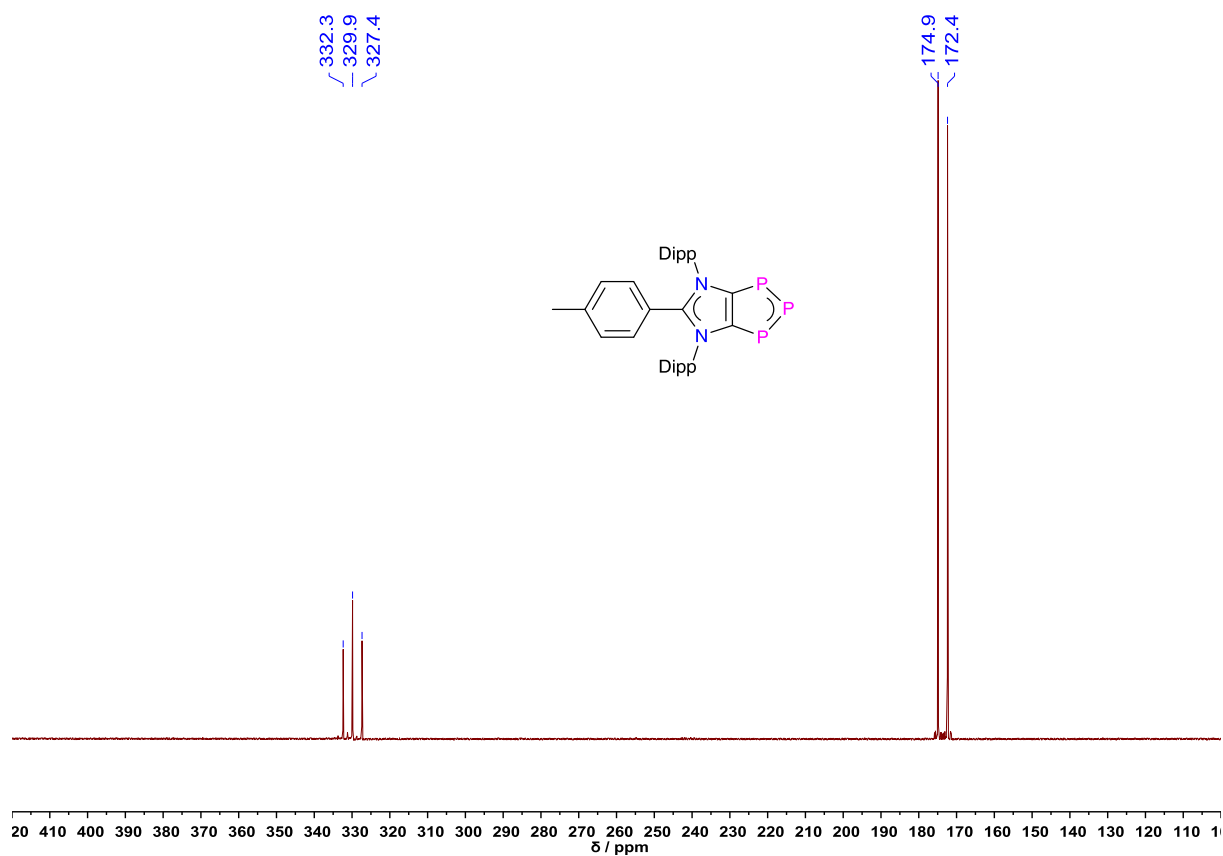

**Fig. S12**  $^{31}\text{P}\{^1\text{H}\}$  NMR (202 MHz,  $\text{CD}_2\text{Cl}_2$ , 298 K) spectrum of compound **4c**.





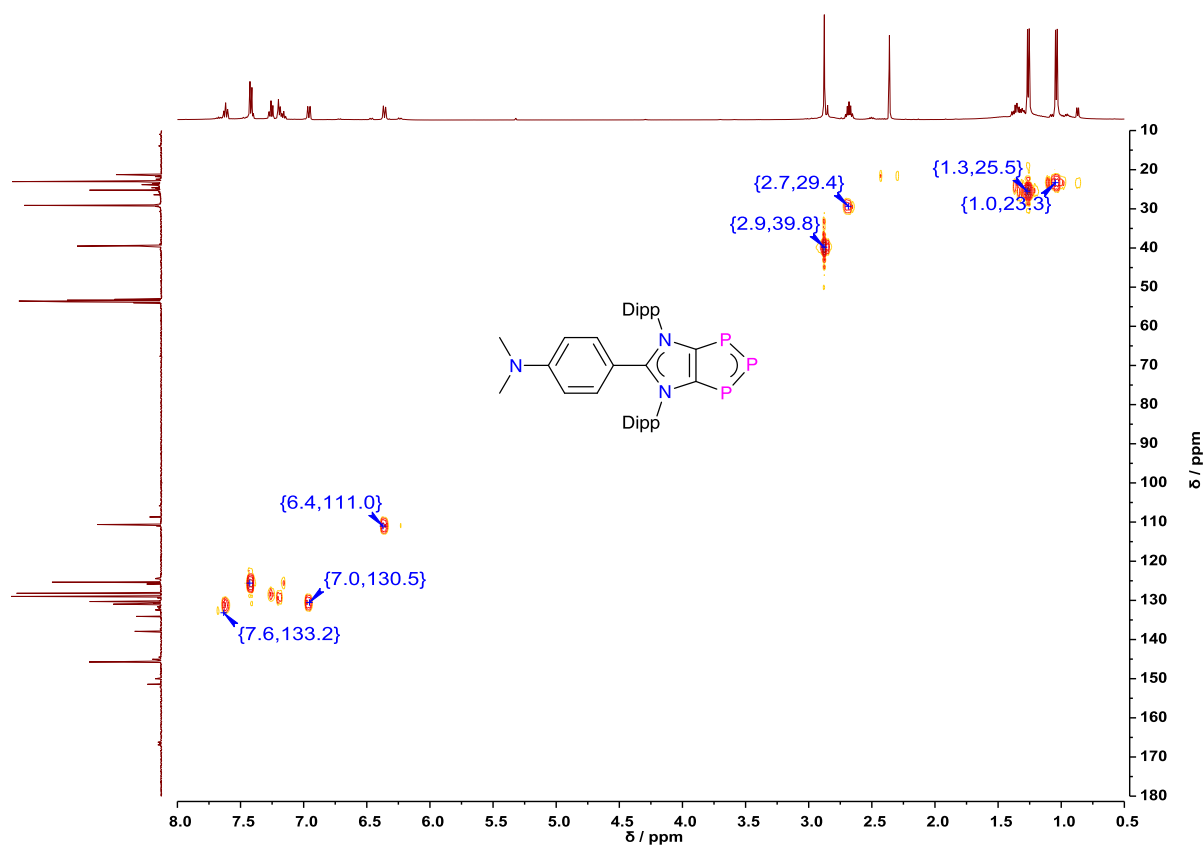

**Fig. S15**  $^1\text{H}$ - $^{13}\text{C}$ -HMQC (500 MHz,  $\text{CD}_2\text{Cl}_2$ , 298 K) spectrum of compound **4d**.

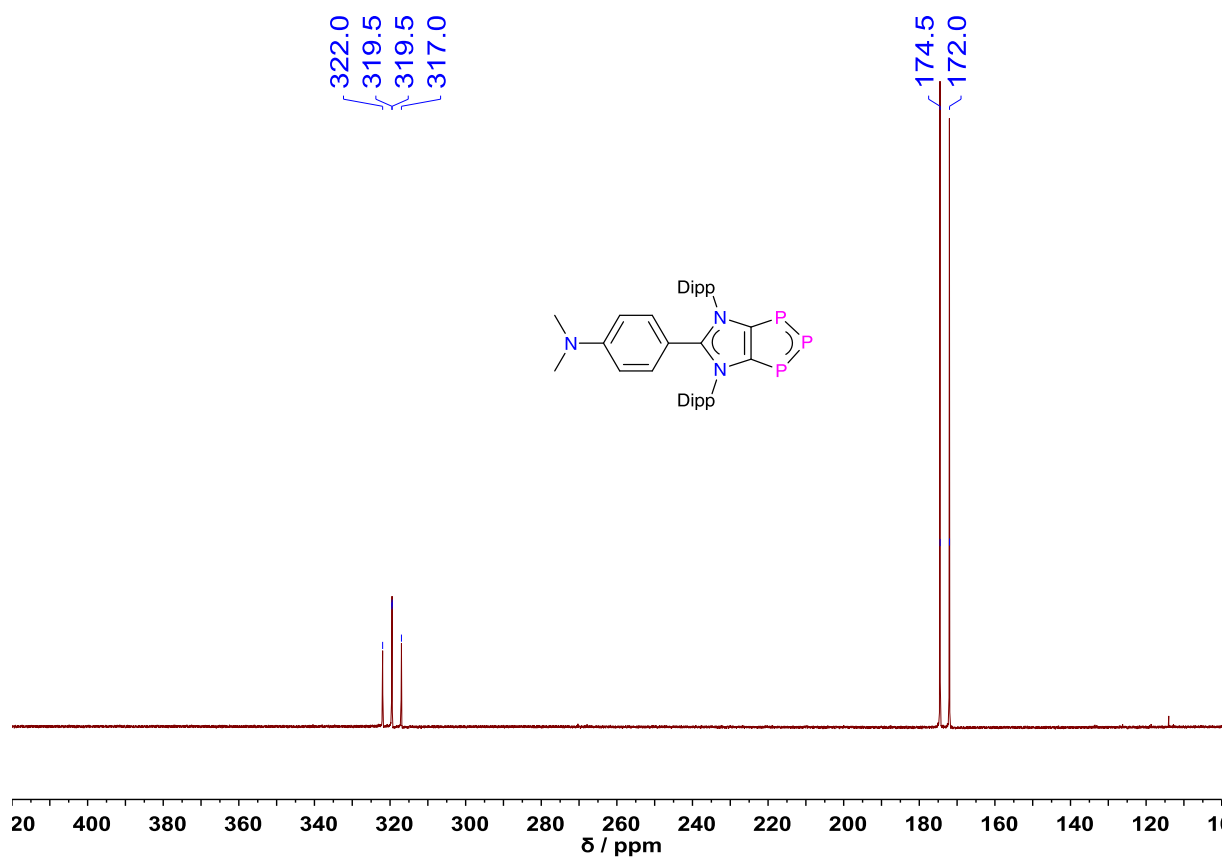

**Fig. S16**  $^{31}\text{P}\{^1\text{H}\}$  NMR (202 MHz,  $\text{CD}_2\text{Cl}_2$ , 298 K) spectrum of compound **4d**.

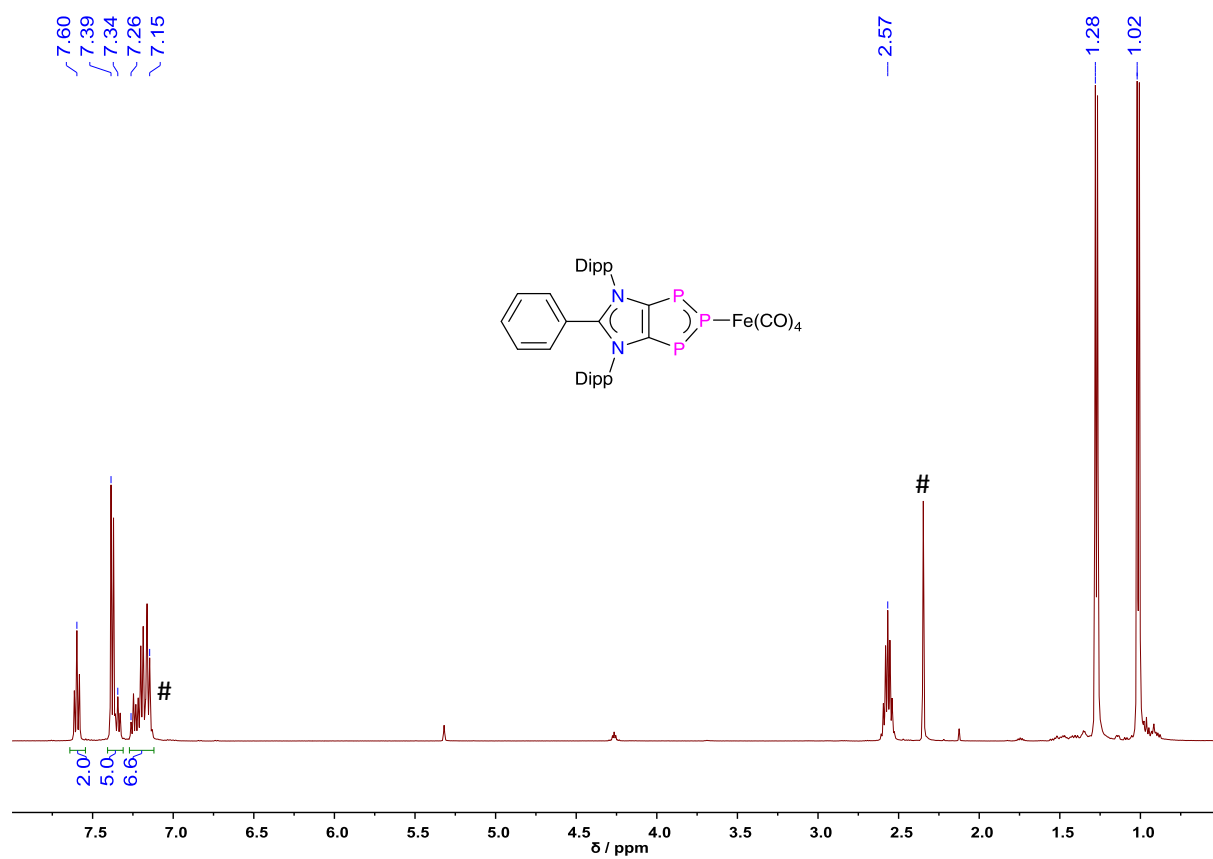

**Fig. S17**  $^1\text{H NMR}$  (500 MHz,  $\text{CD}_2\text{Cl}_2$ , 298 K) spectrum of compound **5a**. # = toluene.

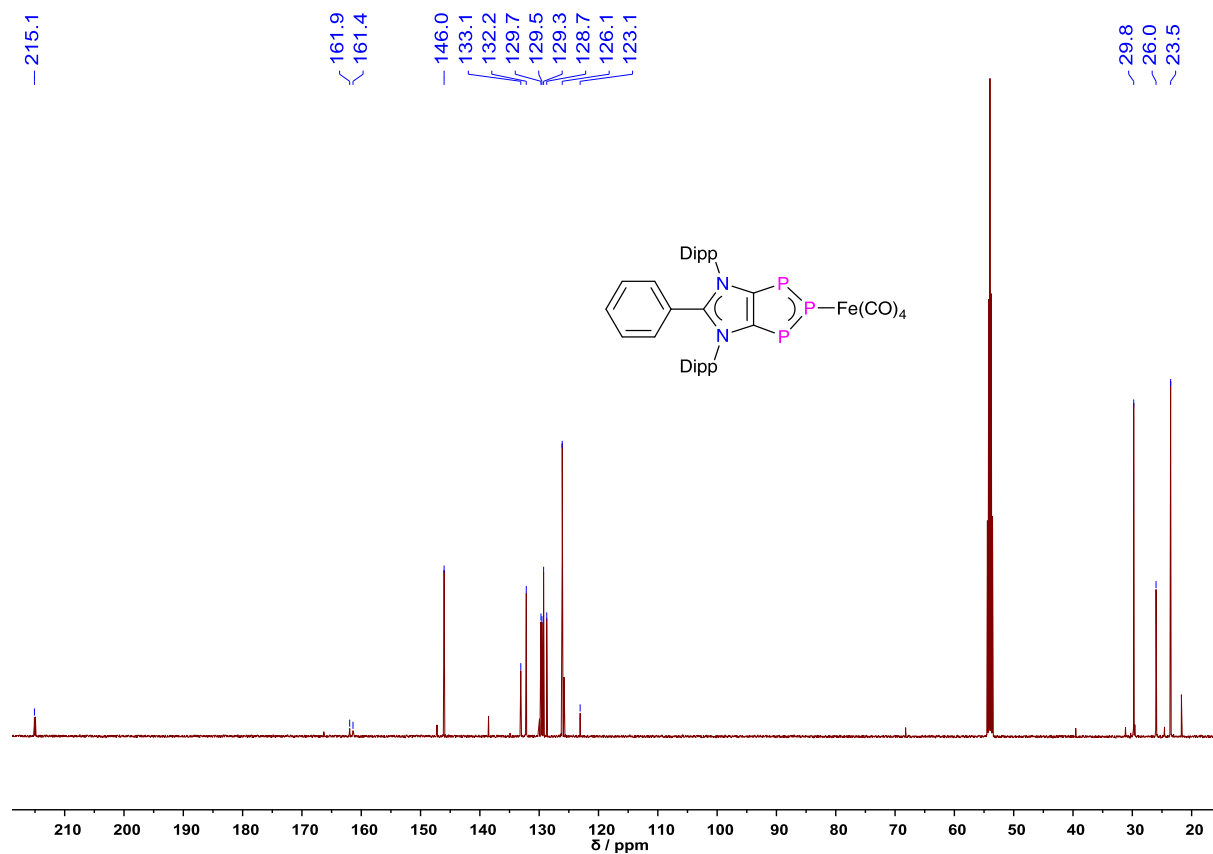

**Fig. S18**  $^{13}\text{C NMR}$  (125 MHz,  $\text{CD}_2\text{Cl}_2$ , 298 K) spectrum of compound **5a**.

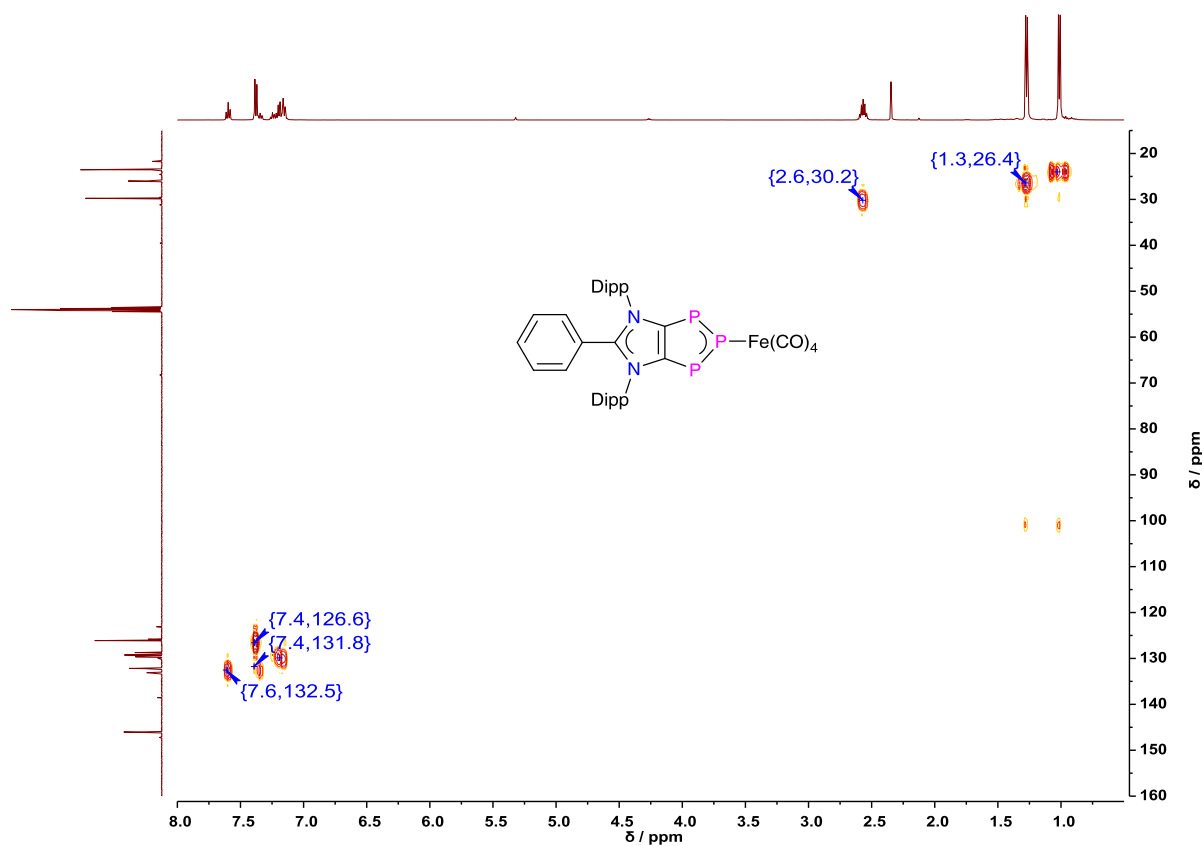

**Fig. S19**  $^1\text{H}$ - $^{13}\text{C}$ -HMQC (500 MHz,  $\text{CD}_2\text{Cl}_2$ , 298 K) spectrum of compound **5a**.

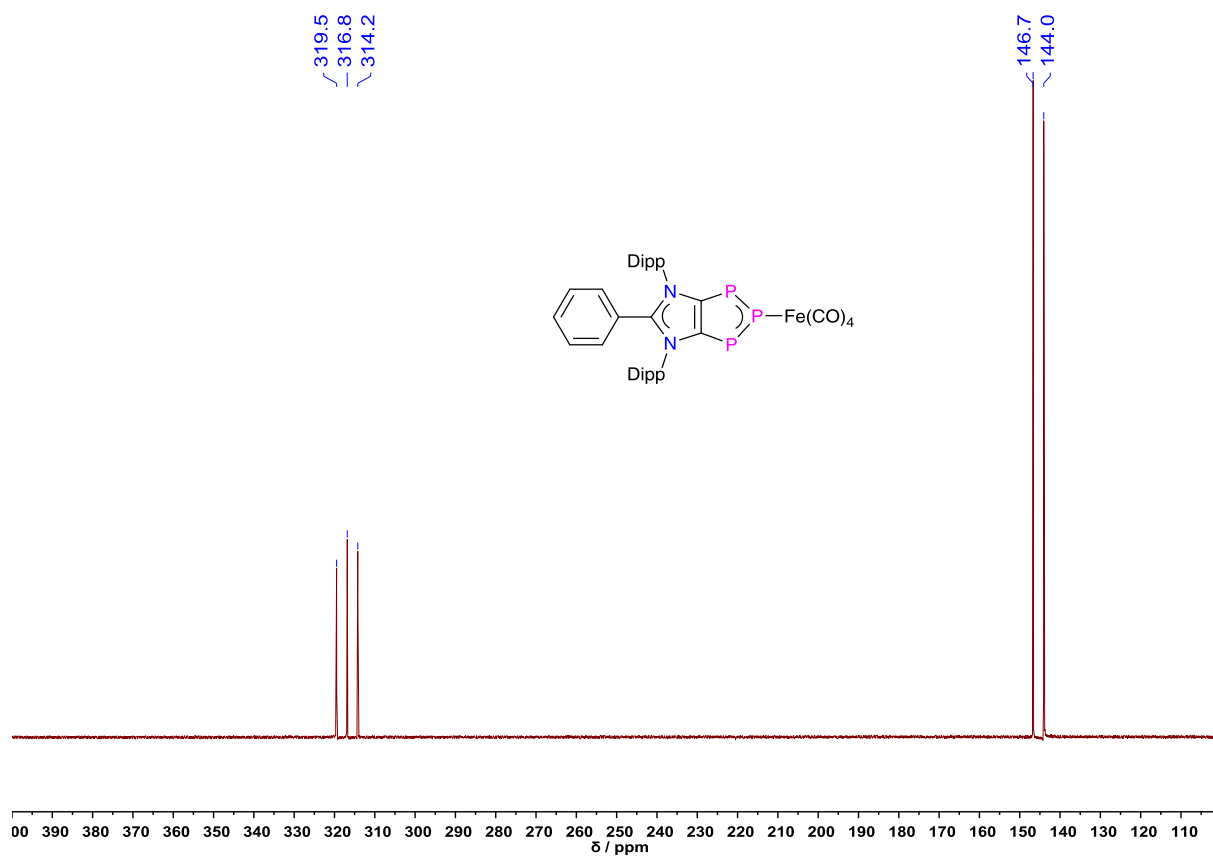

**Fig. S20**  $^{31}\text{P}\{^1\text{H}\}$  NMR (202 MHz,  $\text{CD}_2\text{Cl}_2$ , 298 K) spectrum of compound **5a**.

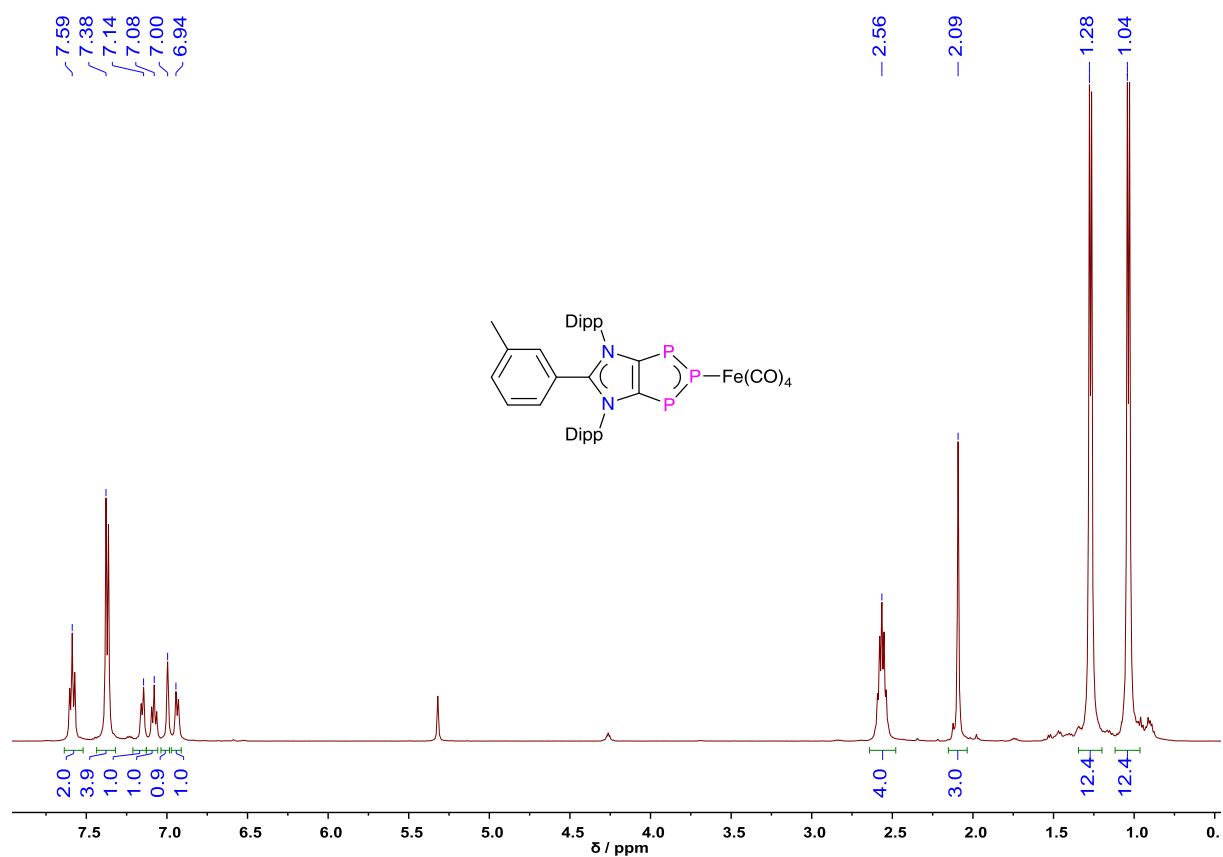

**Fig. S21**  $^1\text{H NMR}$  (500 MHz,  $\text{CD}_2\text{Cl}_2$ , 298 K) spectrum of compound **5b**.

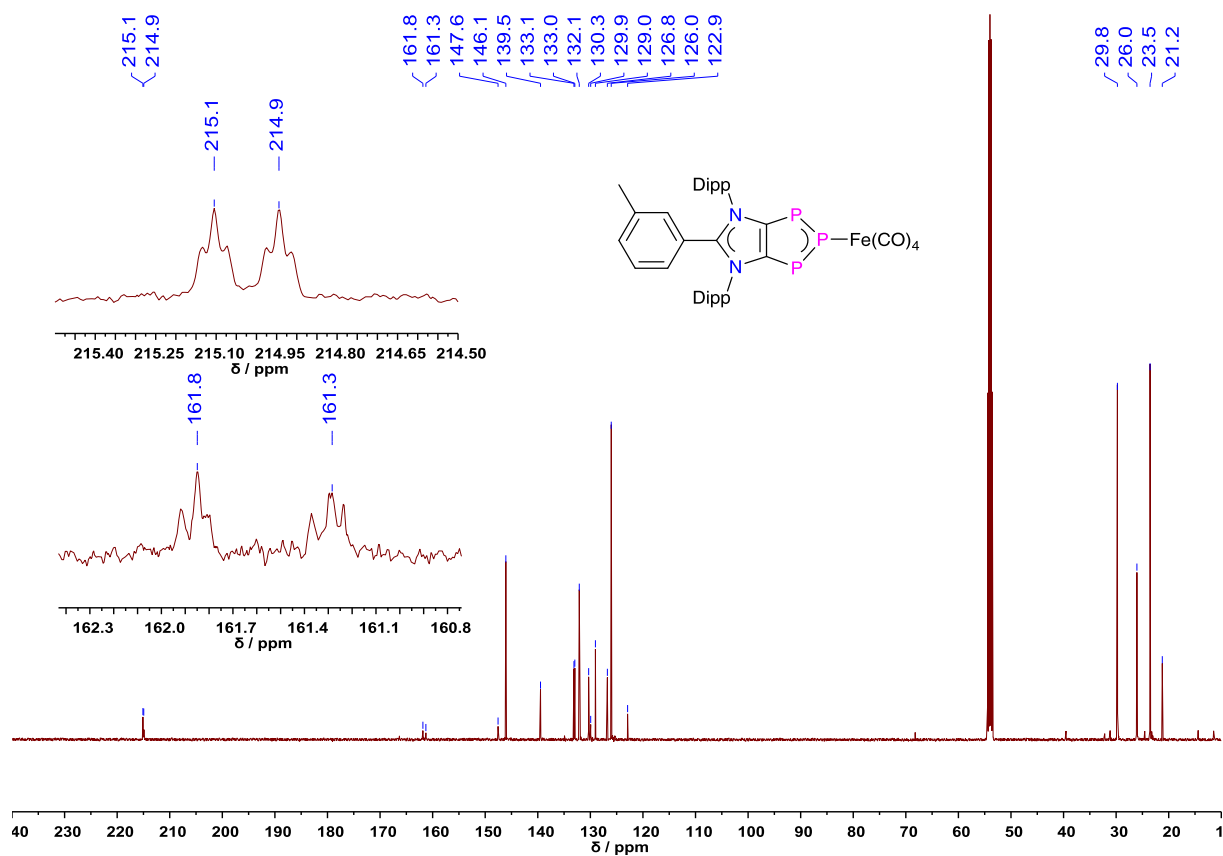

**Fig. S22**  $^{13}\text{C NMR}$  (125 MHz,  $\text{CD}_2\text{Cl}_2$ , 298 K) spectrum of compound **5b**.

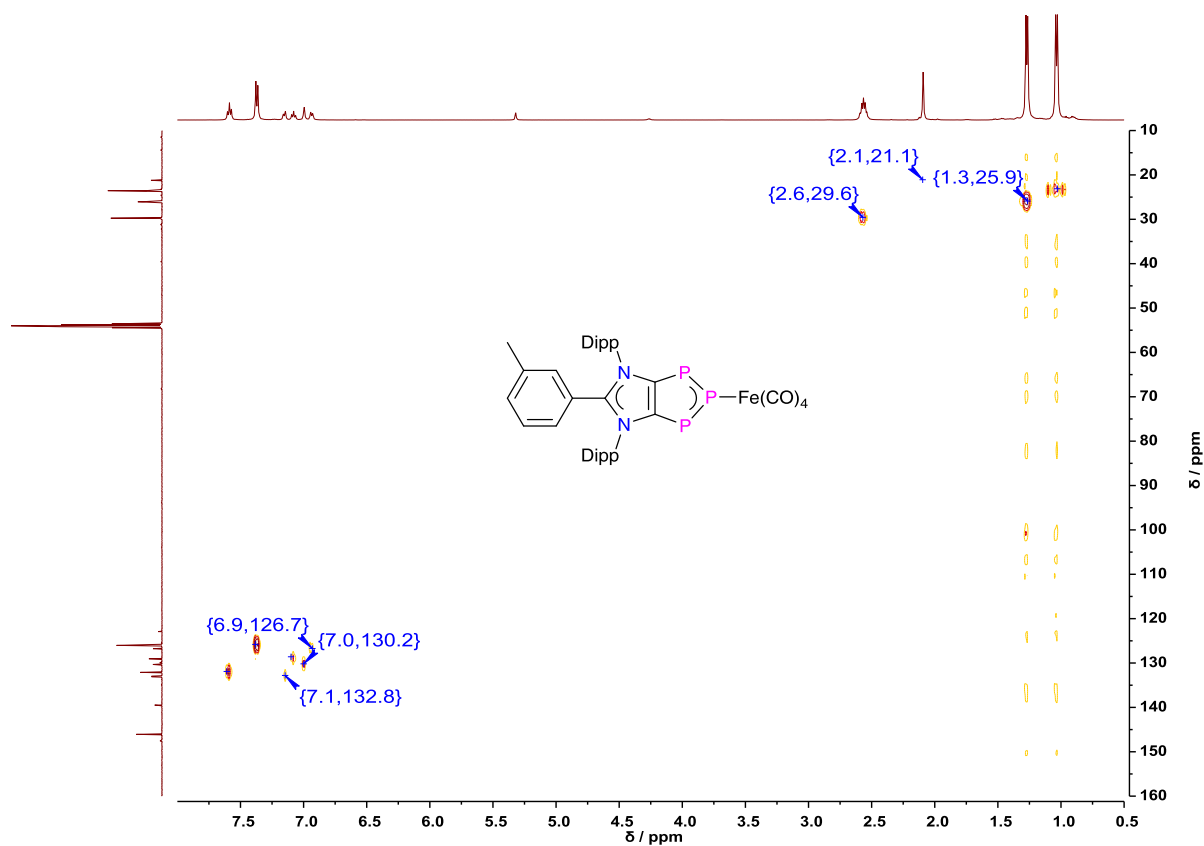

**Fig. S23**  $^1\text{H}$ - $^{13}\text{C}$ -HMQC (500 MHz,  $\text{CD}_2\text{Cl}_2$ , 298 K) spectrum of compound **5b**.

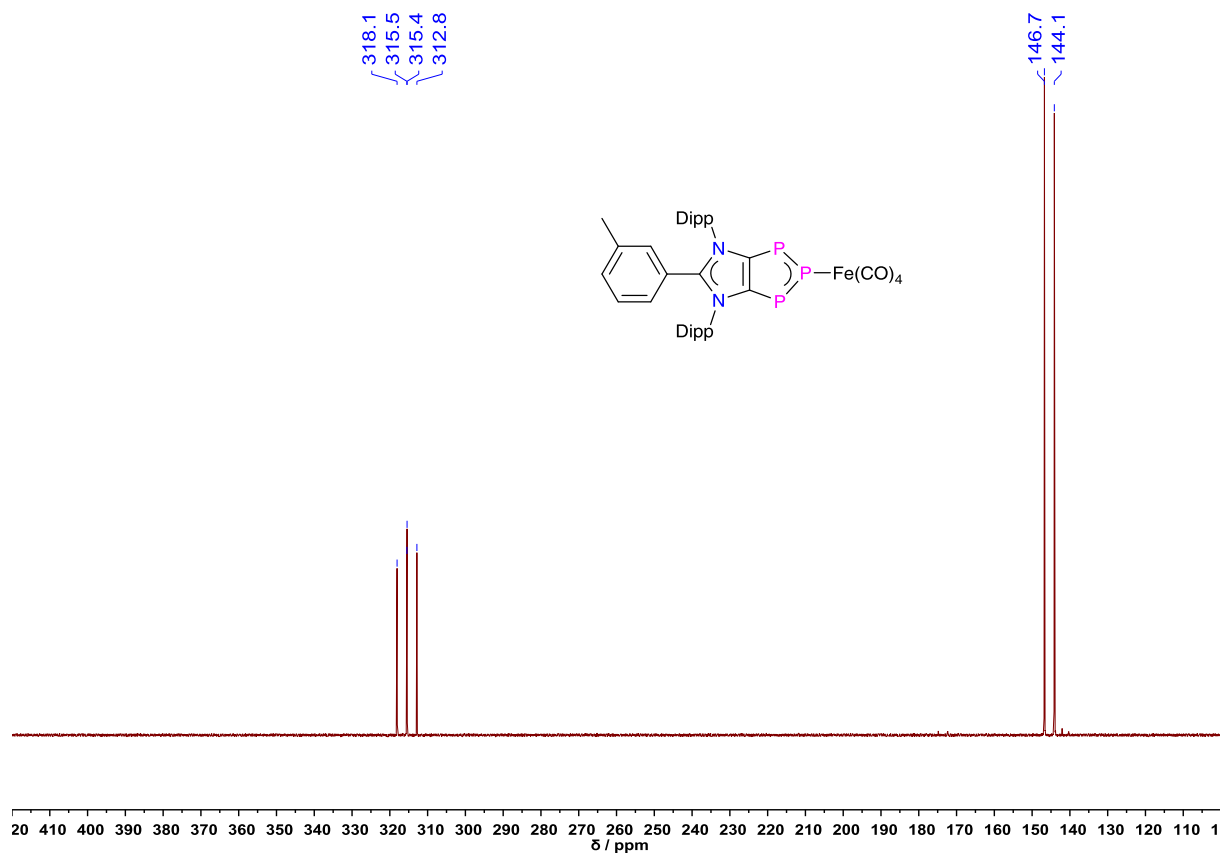

**Fig. S24**  $^{31}\text{P}\{^1\text{H}\}$  NMR (202 MHz,  $\text{CD}_2\text{Cl}_2$ , 298 K) spectrum of compound **5b**.

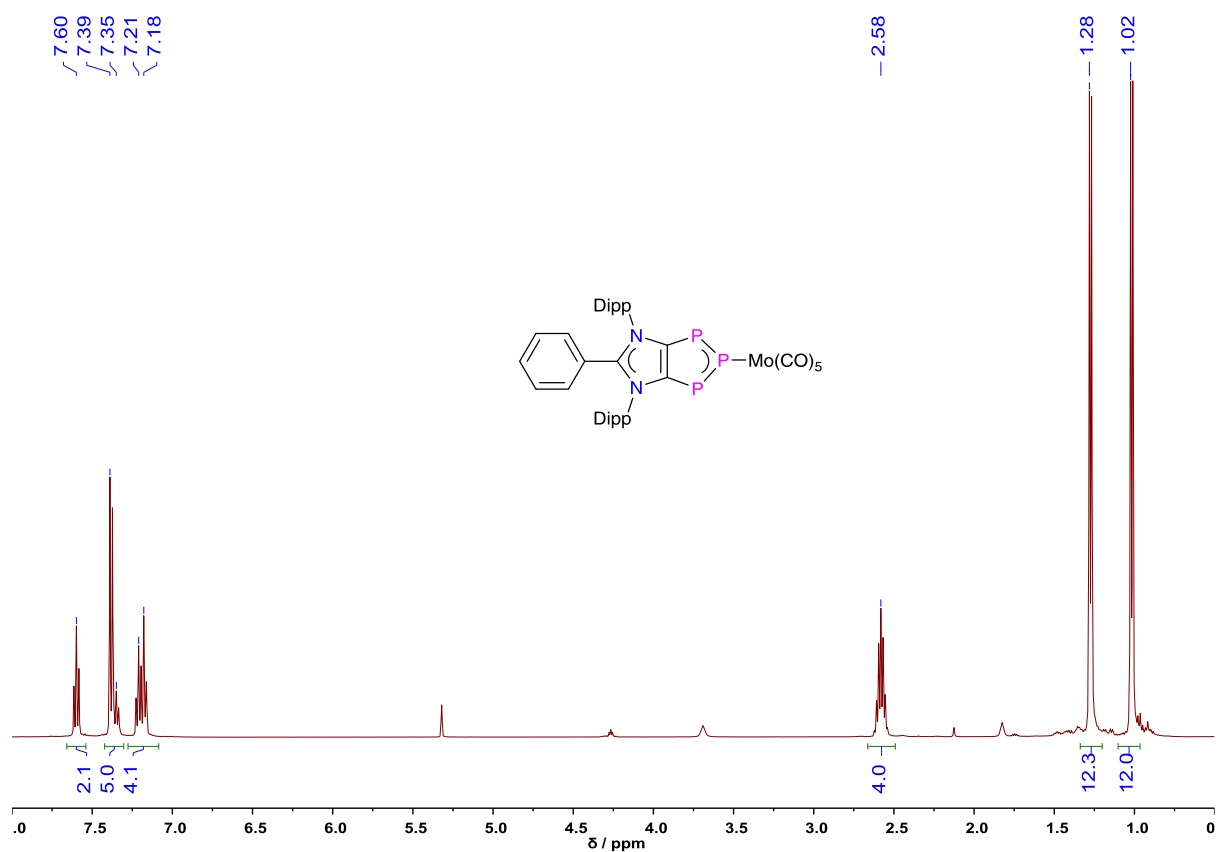

Fig. S25 <sup>1</sup>H NMR (500 MHz, CD<sub>2</sub>Cl<sub>2</sub>, 298 K) spectrum of compound 6.

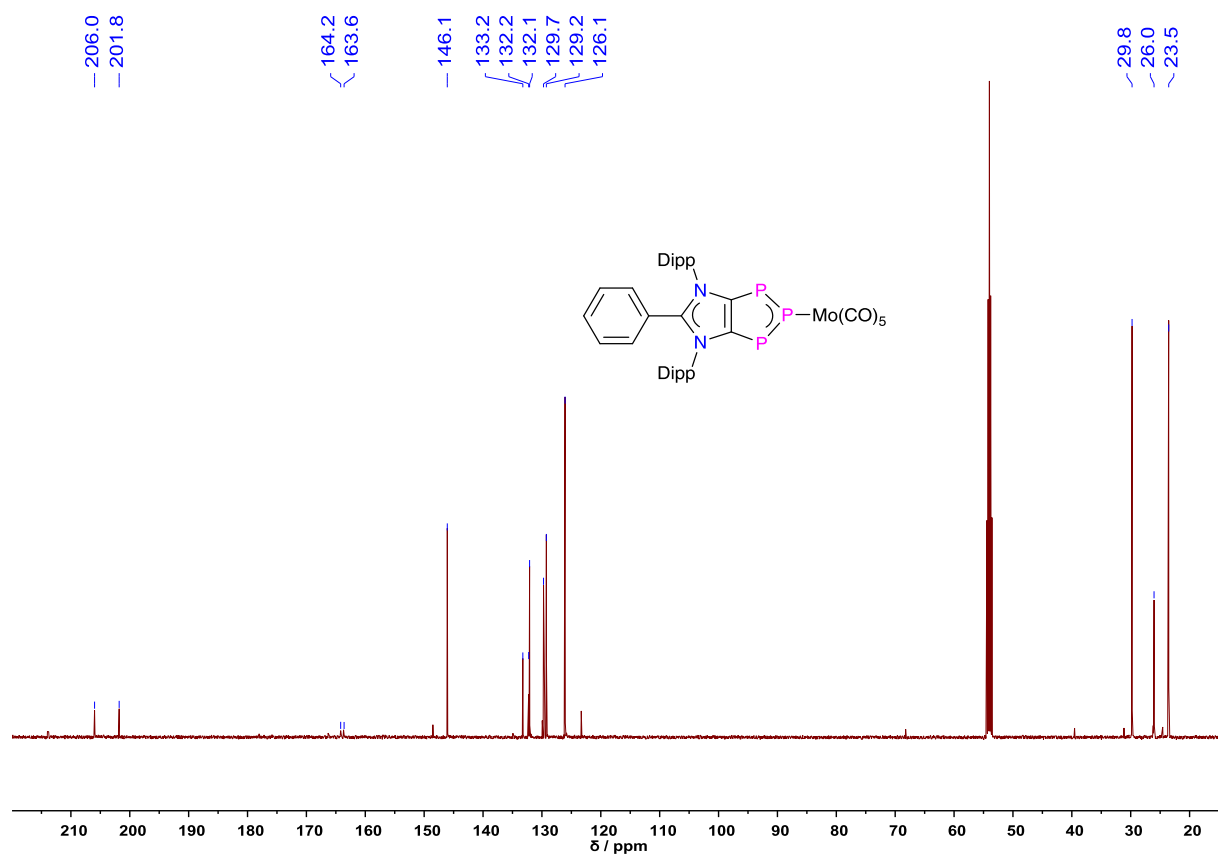

Fig. S26: <sup>13</sup>C NMR (125 MHz, CD<sub>2</sub>Cl<sub>2</sub>, 298 K) spectrum of compound 6.

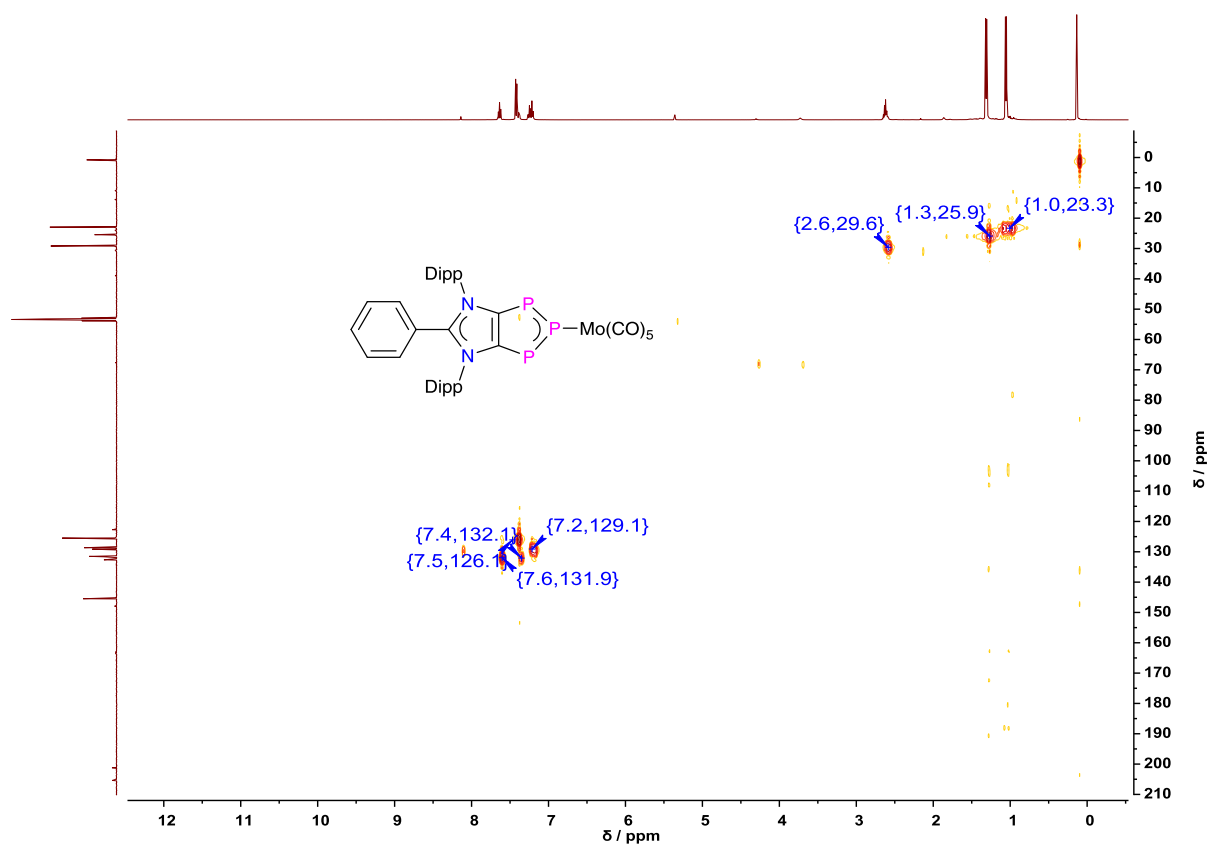

**Fig. S27**  $^1\text{H}$ - $^{13}\text{C}$ -HMQC (500 MHz,  $\text{CD}_2\text{Cl}_2$ , 298 K) spectrum of compound **6**.

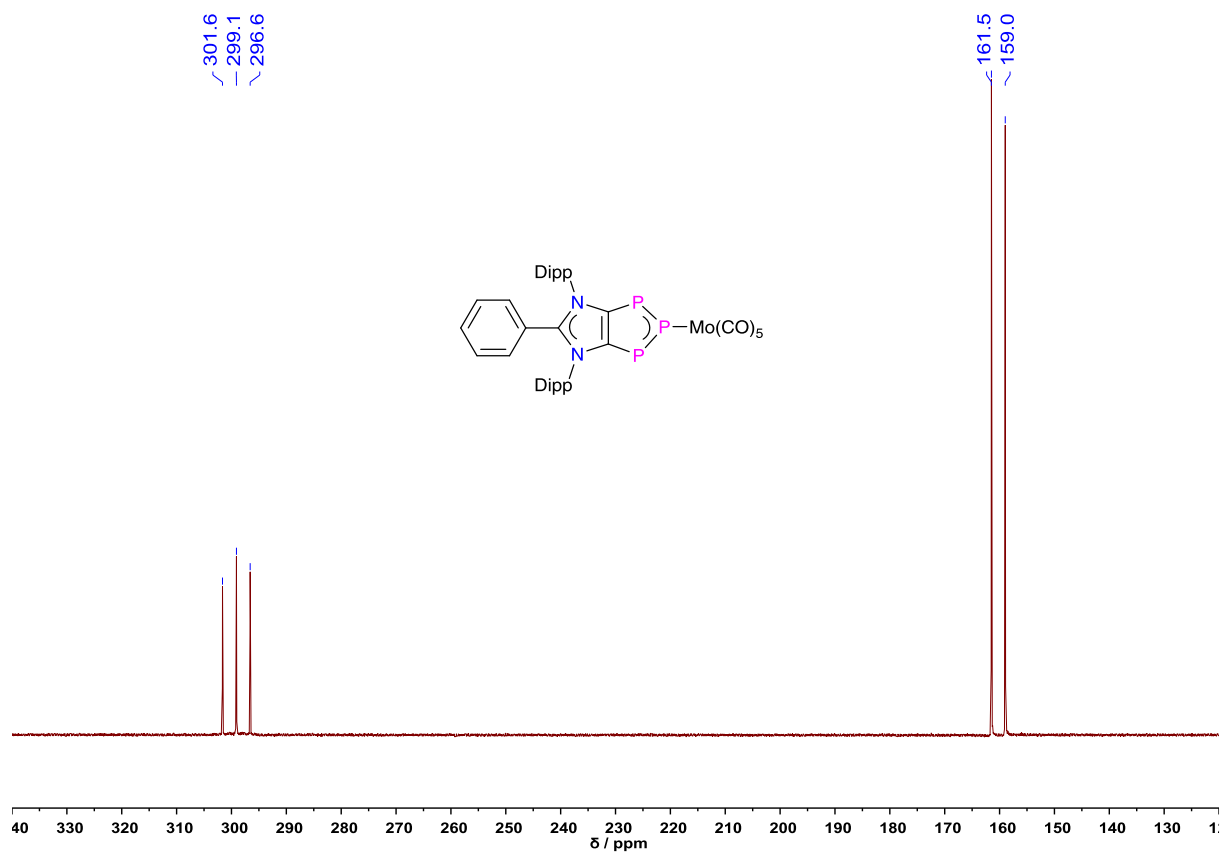

**Fig. S28**  $^{31}\text{P}\{^1\text{H}\}$  NMR (202 MHz,  $\text{CD}_2\text{Cl}_2$ , 298 K) spectrum of compound **6**.



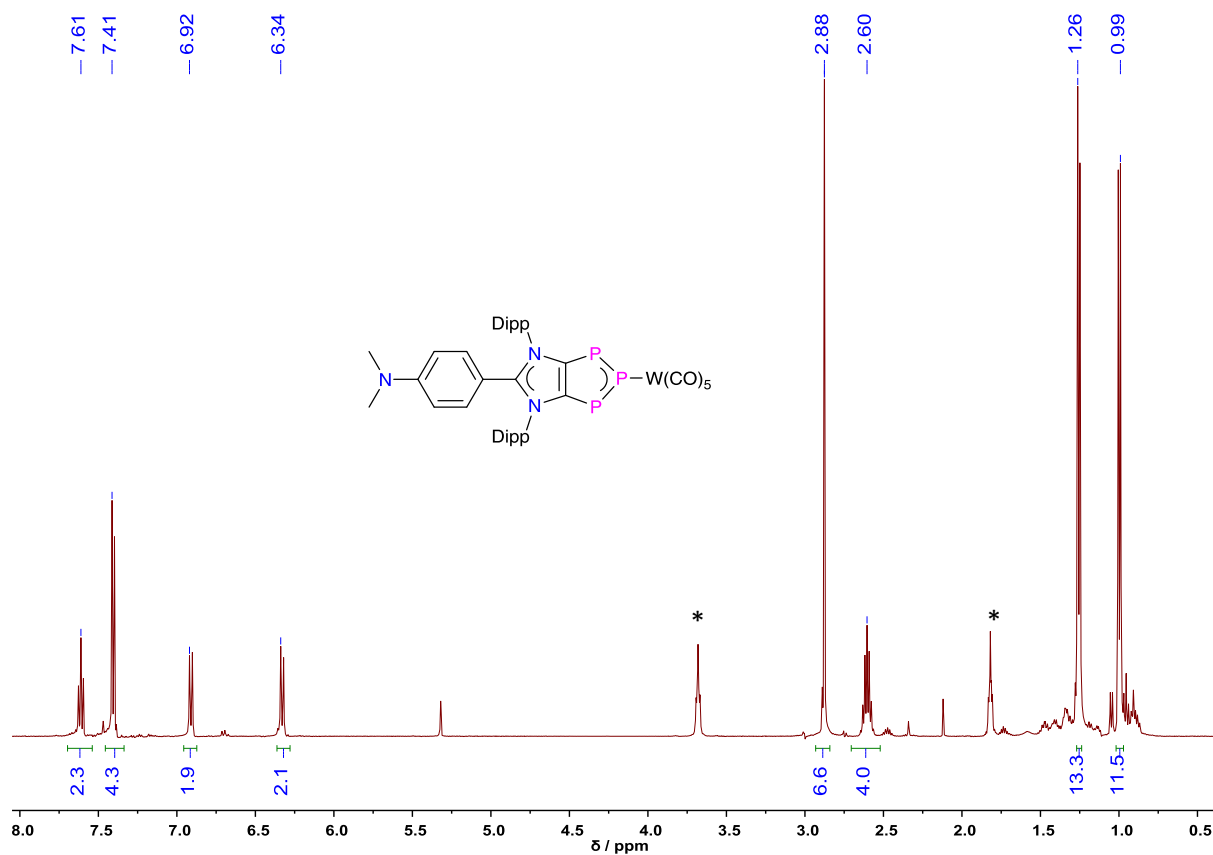

**Fig. S29**  $^1\text{H NMR}$  (500 MHz,  $\text{CD}_2\text{Cl}_2$ , 298 K) spectrum of compound 7. \* = THF.

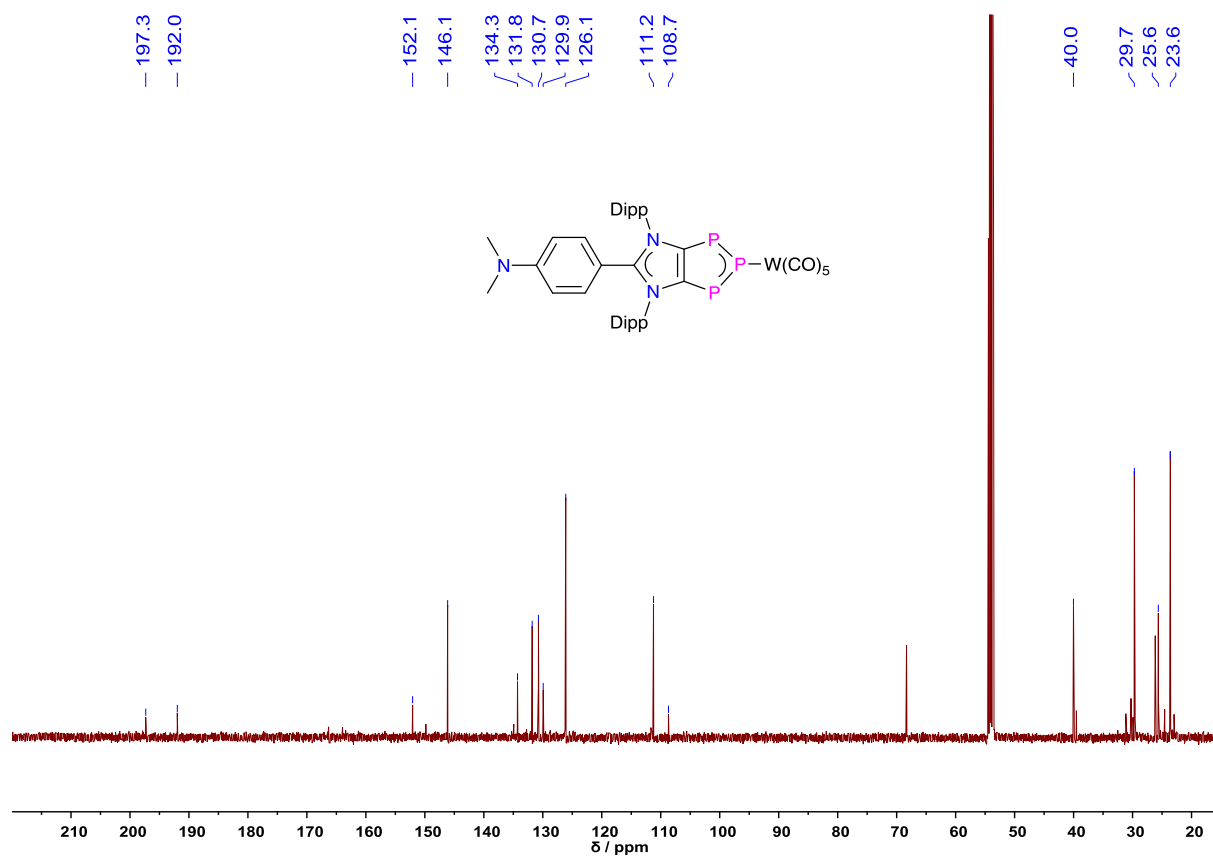

**Fig. S30**  $^{13}\text{C NMR}$  (125 MHz,  $\text{CD}_2\text{Cl}_2$ , 298 K) spectrum of compound 7.

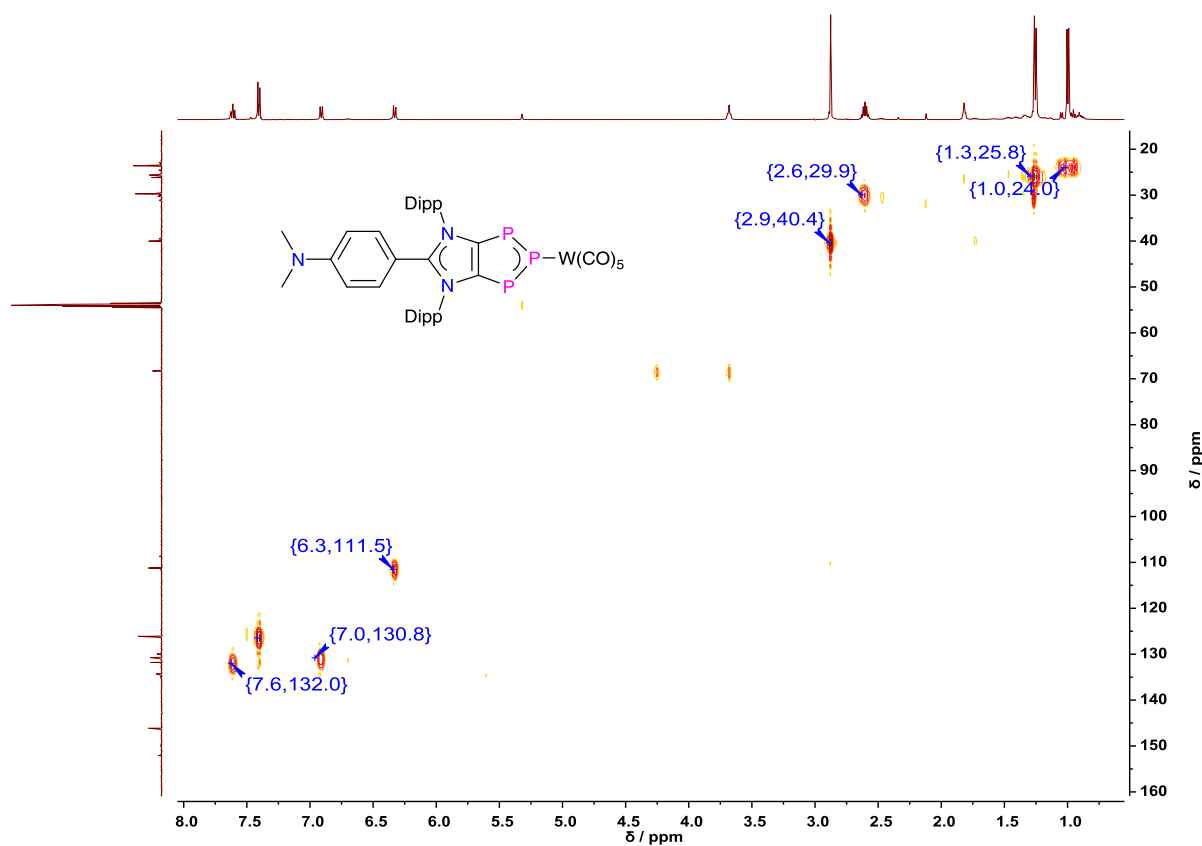

**Fig. S31**  $^1\text{H}$ - $^{13}\text{C}$ -HMQC (500 MHz,  $\text{CD}_2\text{Cl}_2$ , 298 K) spectrum of compound **7**.

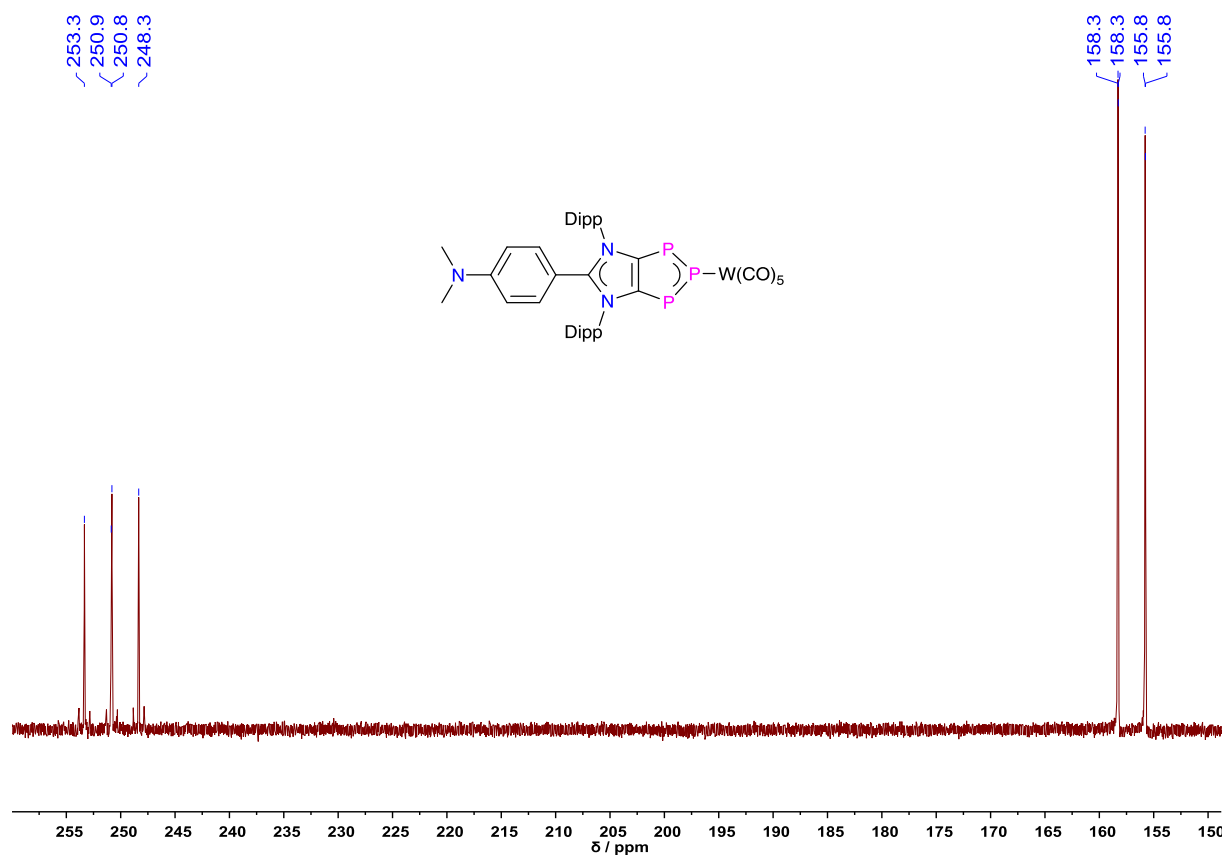

**Fig. S32**  $^{31}\text{P}\{^1\text{H}\}$  NMR (202 MHz,  $\text{CD}_2\text{Cl}_2$ , 298 K) spectrum of compound **7**.

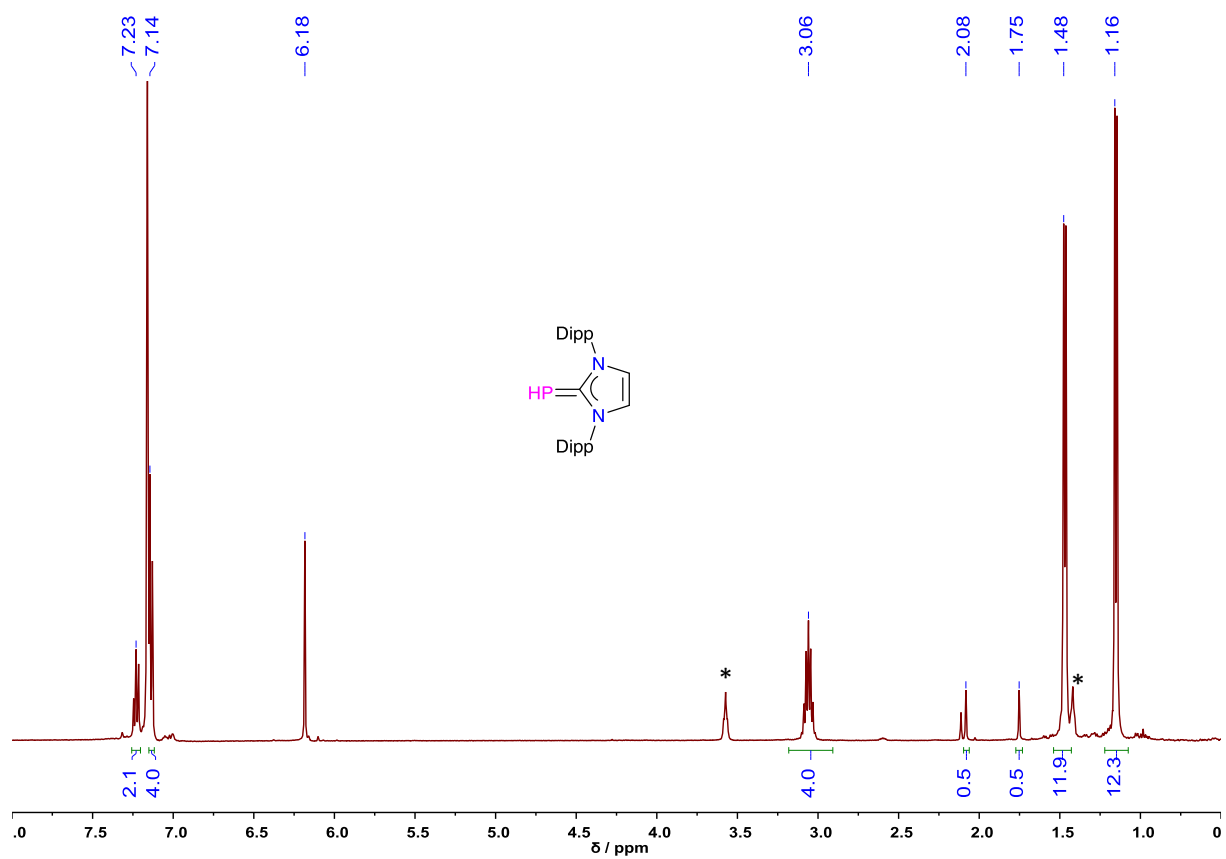

**Fig. S33**  $^1\text{H}$  NMR (500 MHz,  $\text{C}_6\text{D}_6$ , 298 K) spectrum of (IPr)PH prepared from (IPr)HCl and  $\text{Li}_3\text{P}_7$ .

\* = THF

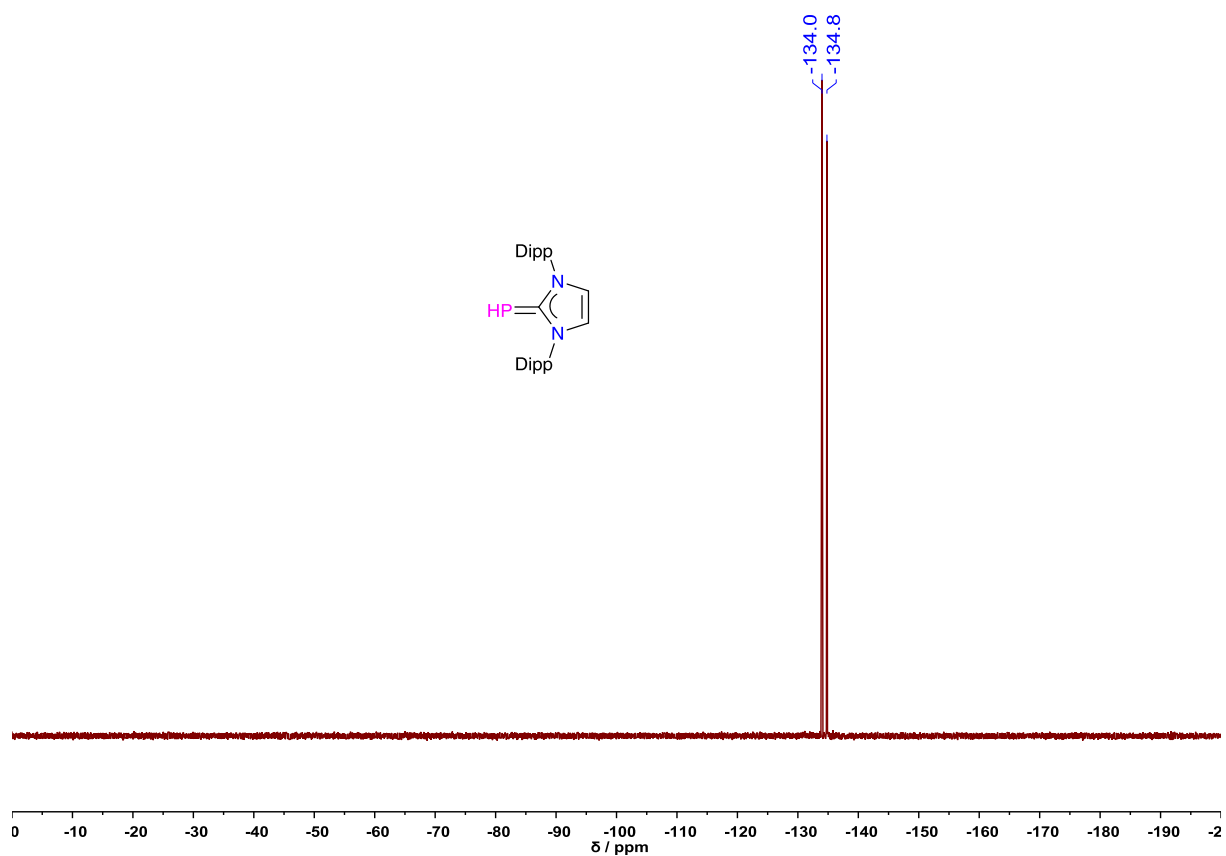

**Fig. S34**  $^{31}\text{P}$  NMR (202 MHz,  $\text{C}_6\text{D}_6$ , 298 K) of (IPr)PH prepared from (IPr)HCl and  $\text{Li}_3\text{P}_7$ .

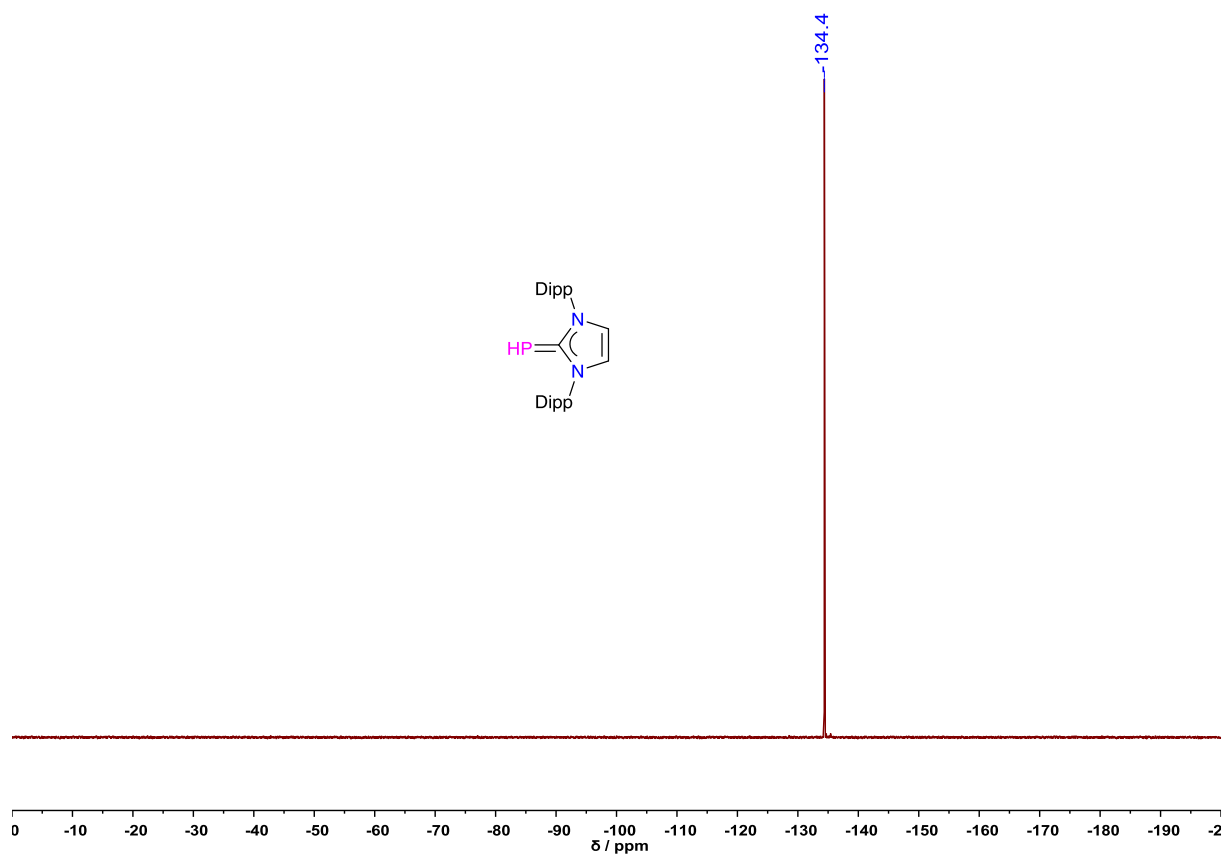

**Fig. S35**  $^{31}\text{P}\{^1\text{H}\}$  NMR (202 MHz,  $\text{C}_6\text{D}_6$ , 298 K) spectrum of (IPr)PH prepared from (IPr)HCl and  $\text{Li}_3\text{P}_7$ .

## UV-vis spectroscopy

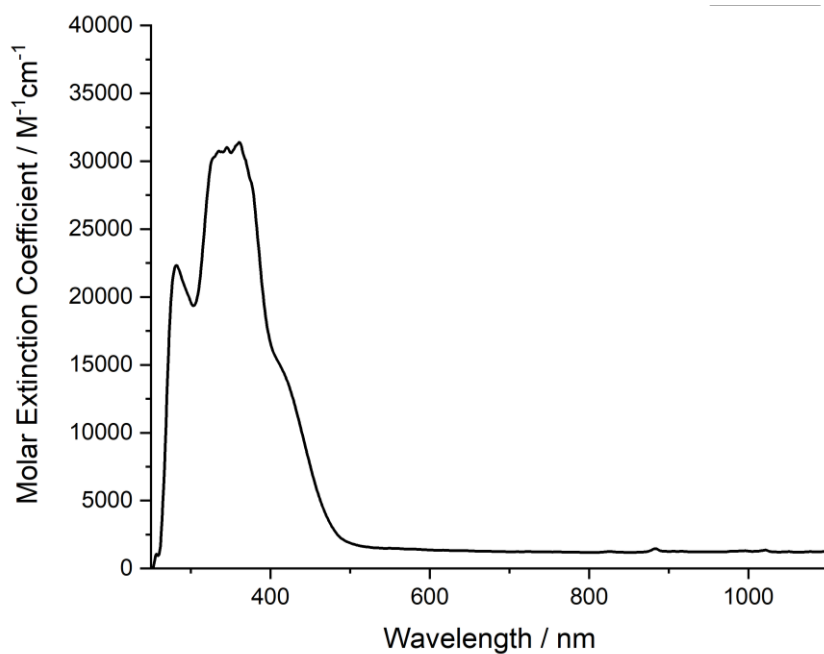

**Fig. S36** UV-vis spectrum of compound **4a** ( $1 \cdot 10^{-4}$  M solution in CH<sub>2</sub>Cl<sub>2</sub>).

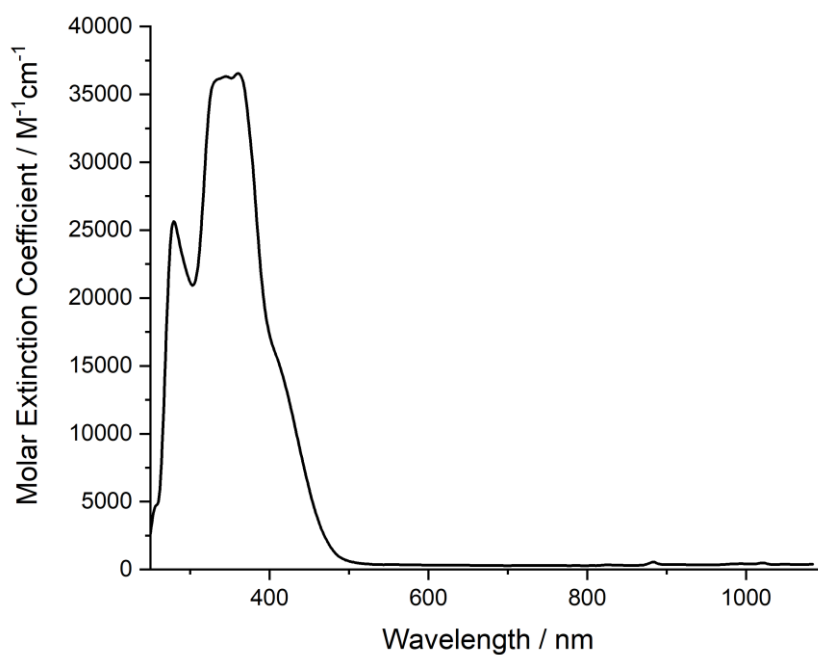

**Fig. S37** UV-vis spectrum of compound **4b** ( $1 \cdot 10^{-4}$  M solution in CH<sub>2</sub>Cl<sub>2</sub>).

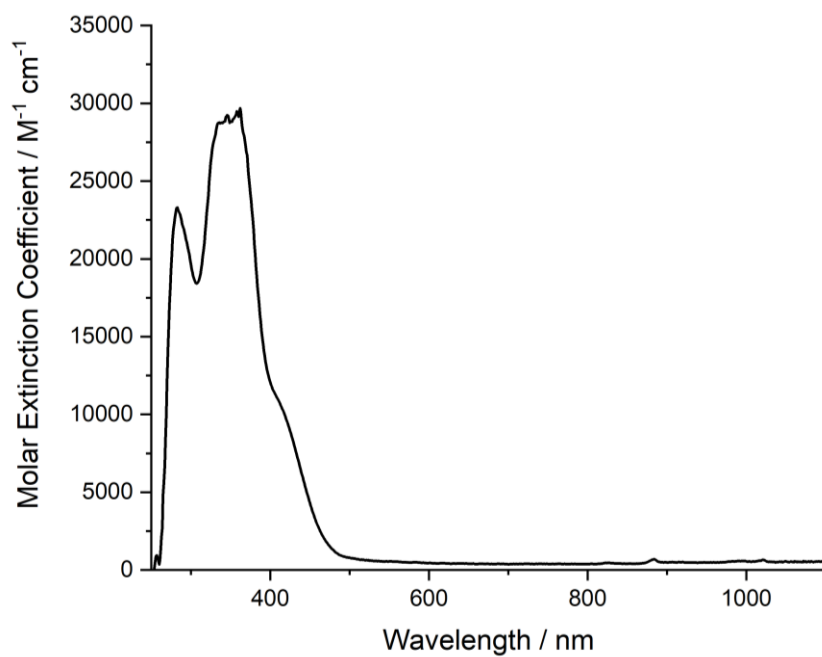

**Fig. S38** UV-vis spectrum of compound **4c** ( $1 \cdot 10^{-4}$  M solution in  $\text{CH}_2\text{Cl}_2$ ).

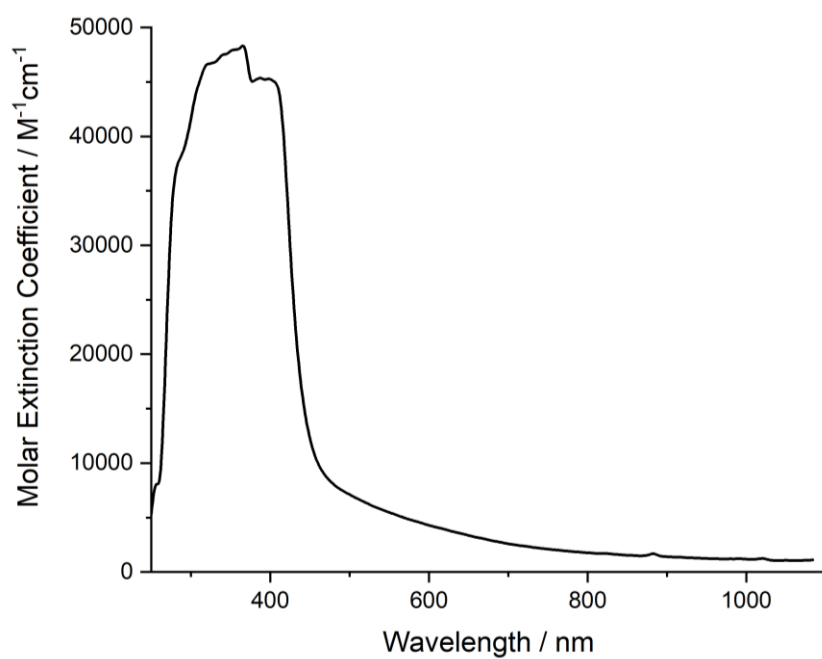

**Fig. S39** UV-vis spectrum of compound **4d** ( $1 \cdot 10^{-4}$  M solution in  $\text{CH}_2\text{Cl}_2$ ).

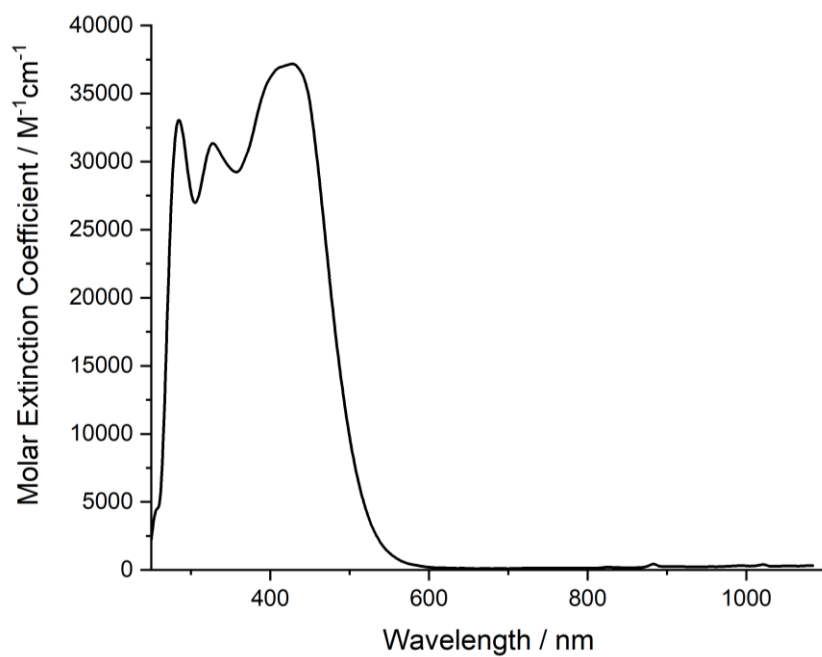

**Fig. S40** UV-vis spectrum of compound **5a** ( $1 \cdot 10^{-4}$  M solution in  $\text{CH}_2\text{Cl}_2$ ).

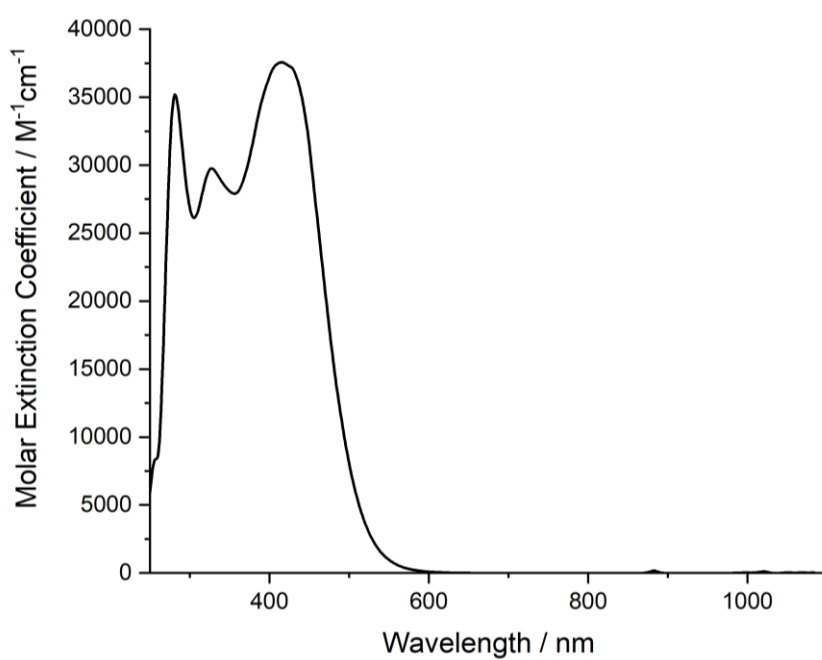

**Fig. S41** UV-vis spectrum of compound **5b** ( $1 \cdot 10^{-4}$  M solution in  $\text{CH}_2\text{Cl}_2$ ).

## IR spectroscopy

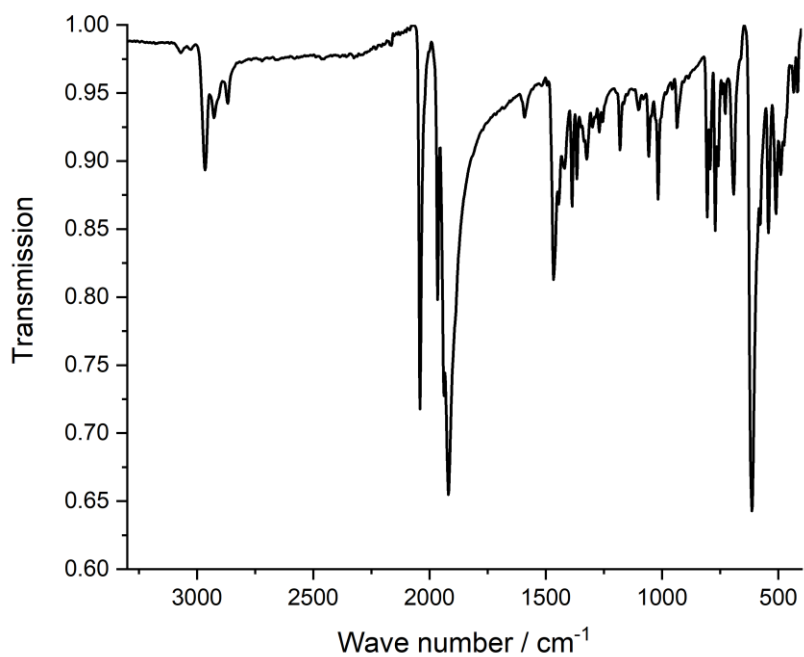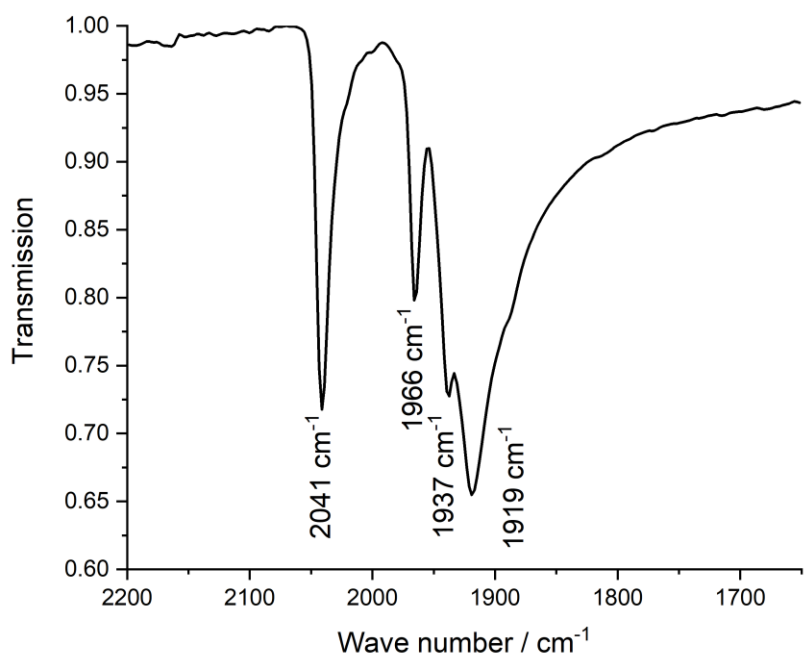

**Fig. S42** IR spectrum of compound **5a** (top). Enlarged from the 2200–1650 cm<sup>-1</sup> region (bottom).



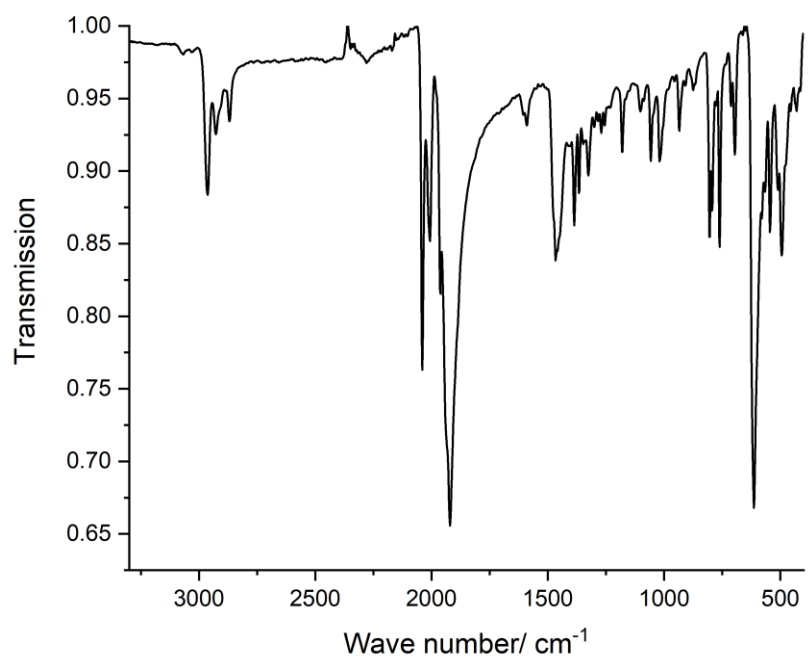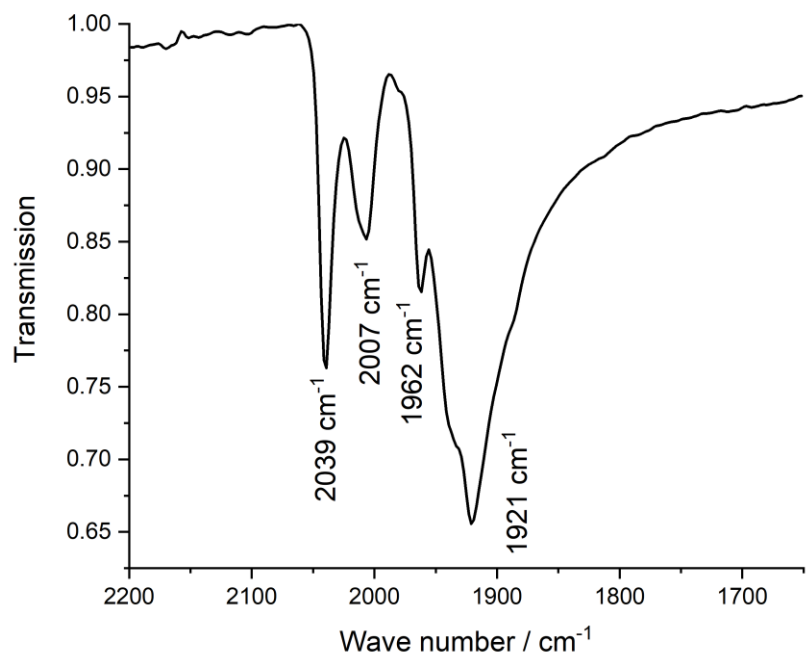

**Fig. S43** IR spectrum of compound **5b** (top). Enlarged from the 2200–1650 cm<sup>-1</sup> region (bottom).

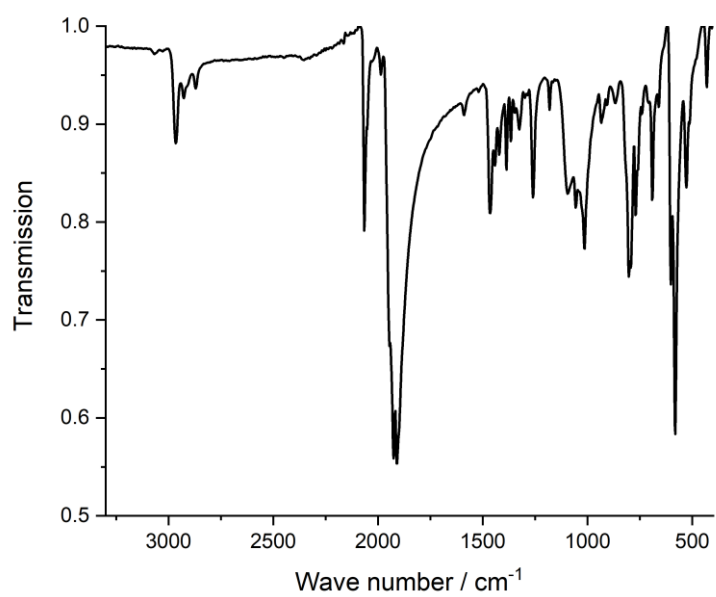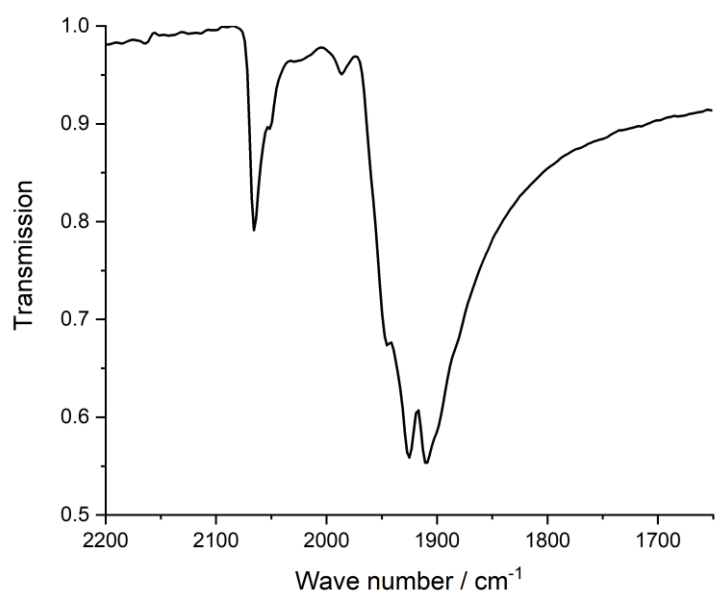

**Fig. S44** IR spectrum of compound **6** (top). Enlarged from the 2200–1650 cm<sup>-1</sup> region (bottom).

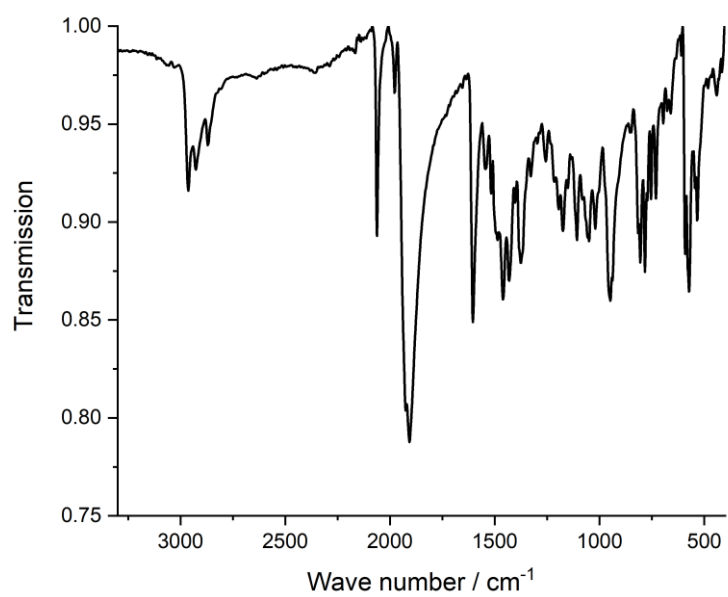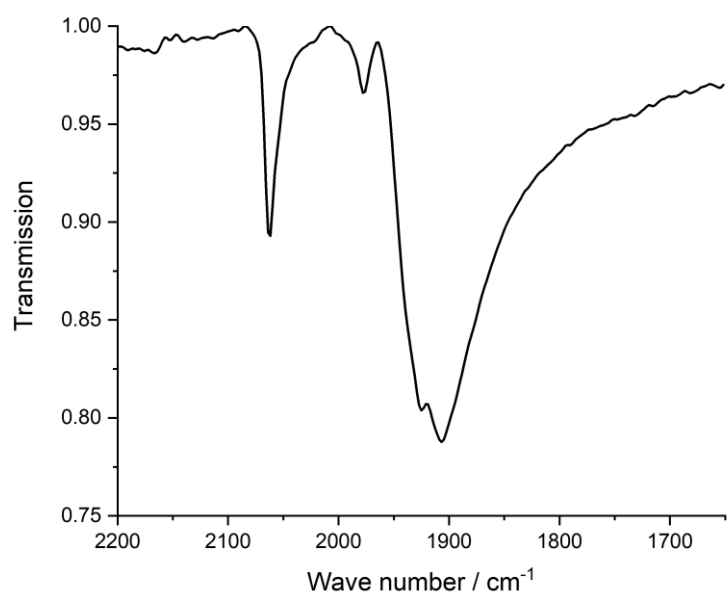

**Fig. S45** IR spectrum of compound **7** (top). Enlarged from the 2200–1650 cm<sup>-1</sup> region (bottom).

## X-Ray diffraction studies

Single crystals of **1b**, **4a-4c**, **5a**, **5b**, **6**, and **7** were examined on a Rigaku Supernova diffractometer. The crystals were kept at 100.0(1) K during data collection. Using Olex2,<sup>1</sup> the structures were solved with the ShelXT<sup>2</sup> structure solution program using Intrinsic Phasing and refined with the ShelXL<sup>3</sup> refinement package using Least Squares minimization. In the structure of **4b**, the tolyl group is disordered on a twofold axis (50:50) leading to influenced disorder of methyl groups C10 and C14 with the same occupation. In the structure of **4c**, one solvent toluene molecule is disordered with ratio 58:42. In the structure of **5a**, one solvent toluene molecule is disordered over two sites (85:15). In **7** one dimethylaniline ligand (C29, C30, C32, C33, C34, and C35) is disordered over two sites with ratio 52:48 and one solvent toluene is disordered on a center of inversion.

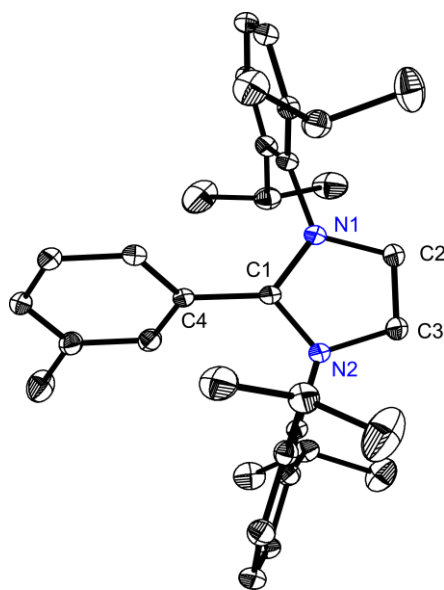

**Fig. S46** Solid-state molecular structures of **1b**. Hydrogen atoms and the bromide counter anion are omitted for clarity. Selected bond lengths (Å) and angles (°): C1–N1 1.345(2), C1–N2 1.348(2), C2–N1 1.386(2), C3–N2 1.384(2), C1–C4 1.466(2), C2–C3 1.351(2), N1–C1–N2 107.0(1), N1–C2–C3 107.2(1), N2–C3–C2 107.0(1).

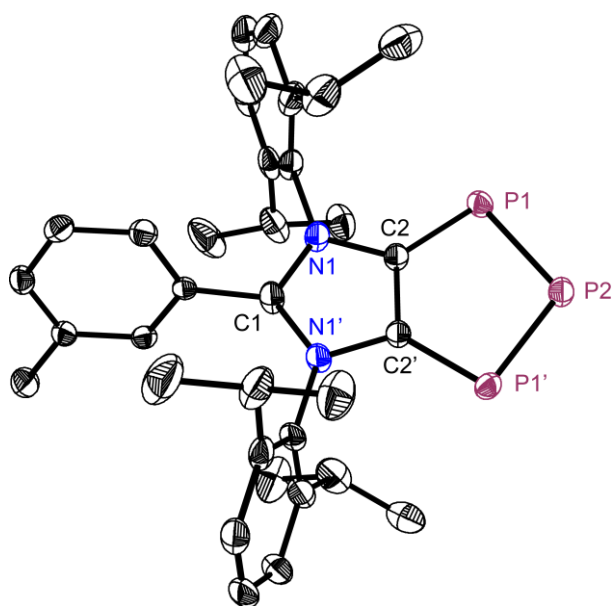

**Fig. S47** Solid-state molecular structure of **4b**. Hydrogen atoms are omitted for clarity.

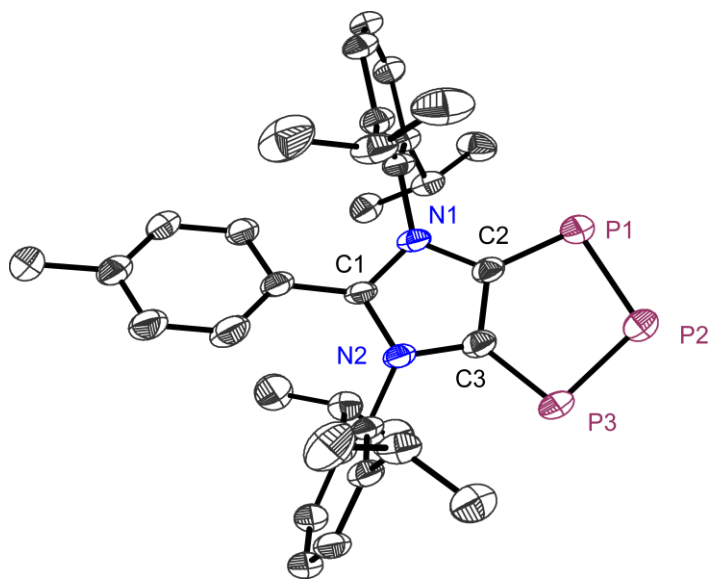

**Fig. S48** Solid-state molecular structure of **4c**. Hydrogen atoms and one solvent toluene molecule are omitted for clarity.

**Table S1.** Selected experimental and calculated [at the M06-2X/def2SVP level of theory] bond lengths (Å) and angles (°) of compounds **4a**, **4b**, and **4c**.

|                                                                                   | <b>4a</b>           | <b>4b</b>           | <b>4c</b>                     |
|-----------------------------------------------------------------------------------|---------------------|---------------------|-------------------------------|
| 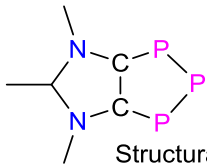 |                     |                     |                               |
| C–C                                                                               | 1.395(5)<br>[1.402] | 1.397(2)<br>[1.402] | 1.395(5)<br>[1.402]           |
| N–C                                                                               | 1.404(3)<br>[1.399] | 1.406(1)<br>[1.399] | 1.410(5), 1.406(5)<br>[1.399] |
| P–C                                                                               | 1.757(3)<br>[1.764] | 1.752(1)<br>[1.764] | 1.747(4), 1.755(4)<br>[1.764] |
| P–P                                                                               | 2.103(1)<br>[2.112] | 2.103(1)<br>[2.112] | 2.108(2), 2.107(2)<br>[2.112] |
| P–P–C                                                                             | 94.9(1)<br>[94.8]   | 95.1(1)<br>[94.9]   | 95.4(1), 95.3(2)<br>[94.9]    |
| P–P–P                                                                             | 104.0(1)<br>[104.1] | 103.7(1)<br>[104.0] | 103.3(1)<br>[104.0]           |

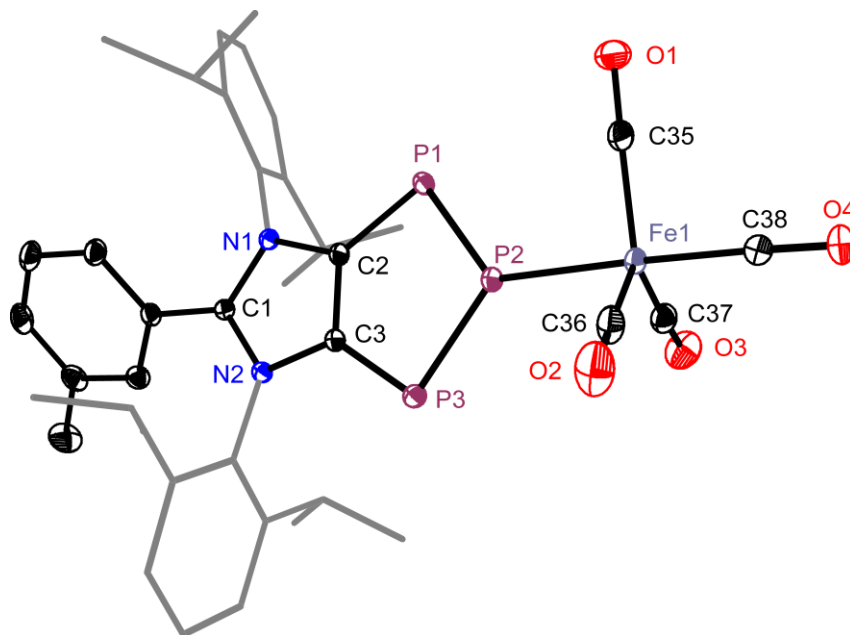

**Fig. S49** Solid-state molecular structure of **5b**. Hydrogen atoms and one solvent toluene molecule are omitted for clarity. Selected bond lengths (Å) and angles (°): C–C 1.395(1), C2–N1 1.399(1), C3–N2 1.405(1), C2–P1 1.756(1), C3–P3 1.763(1), P1–P2 2.081(1), P2–P3 2.092(1), P2–Fe1 2.247(1), Fe1–C35 1.791(1), Fe1–C36 1.792(1), Fe1–C37 1.808(1), Fe1–C38 1.784(1), P1–P2–P3 108.7(1), P2–Fe1–C38 177.9(1).

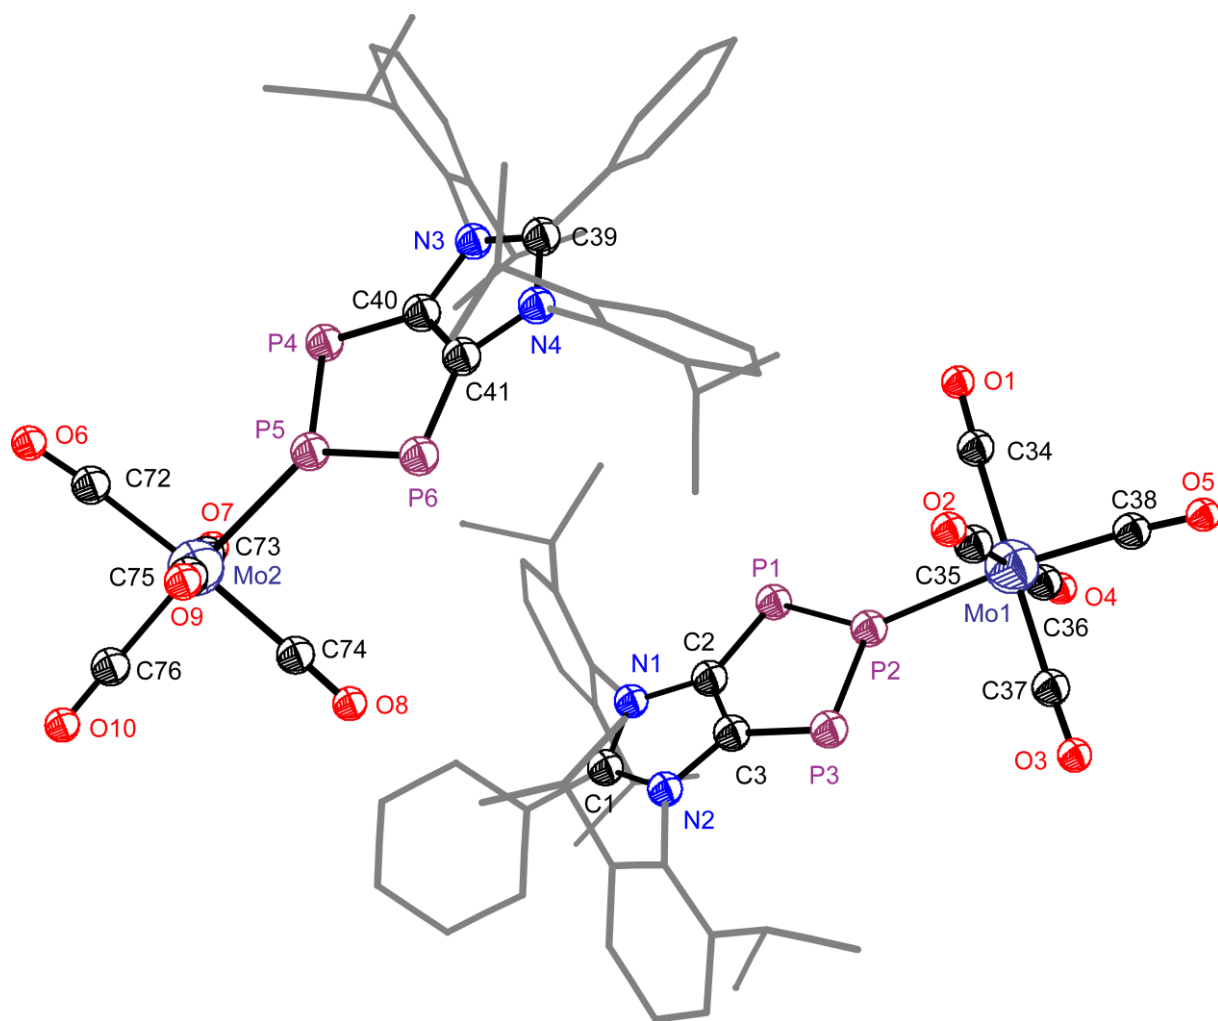

**Fig. S50** Molecular Structure of **6**. Hydrogen atoms were omitted for clarity. Selected bond (Å) lengths and angles (°): N1–C2 1.405(1), N2–C3 1.397(1), C2–C3 1.396(2), C2–P1 1.763(1), C3–P3 1.754(1), P1–P2 2.091(1), P2–P3 2.085(1), P2–Mo1 2.508(1) [2.515(1)], Mo1–C34 2.056(1), Mo1–C35 2.039(1), Mo1–C36 2.047(1), Mo1–C37 2.056(1), Mo1–C38 1.995(1), N1–C2–C3 106.0(1), N2–C3–C2 106.5(1), C2–C3–P3 124.2(1), C3–C2–P1 123.6(1), P1–P2–P3 107.0(1), P1–P2–Mo1 135.4(1), P3–P2–Mo1 117.5(1), P2–Mo1–C34 95.0(1), P2–Mo1–C35 86.4(1), P2–Mo1–C36 92.8(1), P2–Mo1–C37 86.1(1), P2–Mo1–C38 171.5(1); N3–C40 1.402(1), N4–C41 1.409(1), C40–P4 1.762(1), C41–P6 1.761(1), P4–P5 2.090(1), P5–P6 2.099(1), P5–Mo2 2.515(1), Mo2–C72 2.048(1), Mo2–C73 2.051(1), Mo2–C74 2.040(1), Mo2–C75 2.048(1), Mo2–C76 1.999(1), N3–C40–C41 106.5(1), N4–C41–C40 106.1(1), C40–C41–P6 123.2(1), C41–C40–P4 124.9(1), P4–P5–P6 107.3(1), P4–P5–Mo2 128.1(1), P6–P5–Mo2 124.4(1), P5–Mo2–C72 95.6(1), P5–Mo2–C73 90.1(1), P5–Mo2–C74 87.7(1), P5–Mo2–C75 87.4(1), P5–Mo2–C76 174.6(1).

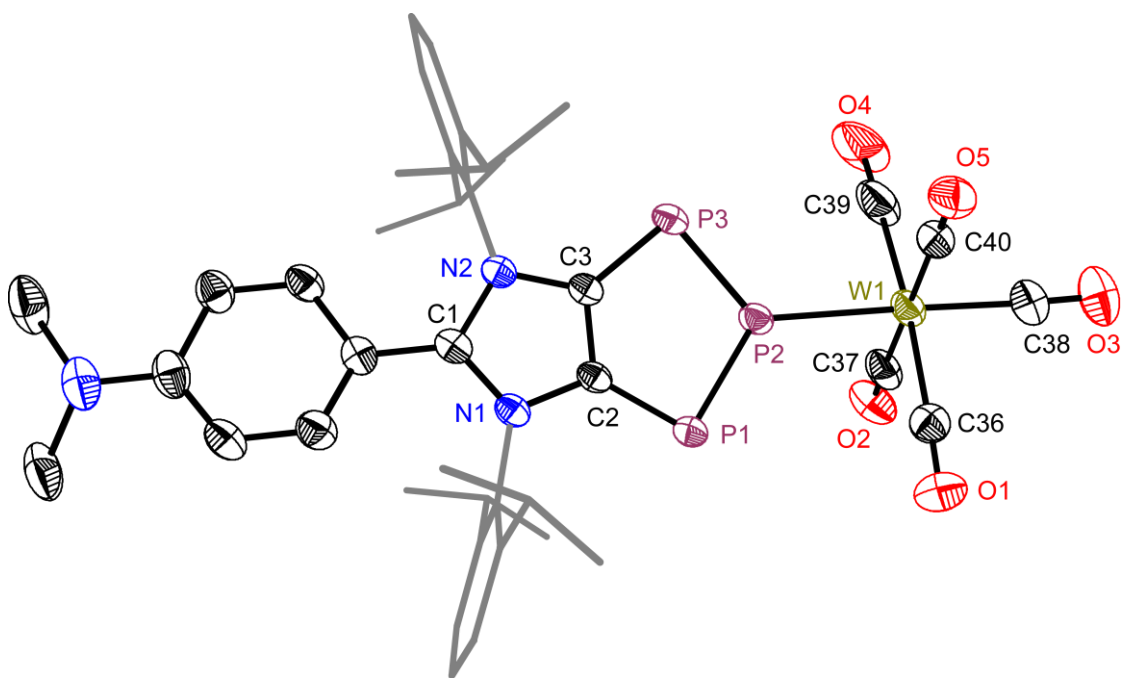

**Fig. S51** Molecular Structure of **7**. Hydrogen atoms and two solvent toluene molecules were omitted for clarity. Selected bond (Å) lengths and angles (°): N1–C2 1.399(4), N2–C3 1.403(4), C2–C3 1.388(4), C2–P1 1.755(3), C3–P3 1.761(3), P1–P2 2.093(1), P2–P3 2.092(1), P2–W1 2.494(1), W1–C36 2.044(4), W1–C37 2.047(5), W1–C38 1.966(4), W1–C39 2.044(5), W1–C40 2.036(5), N1–C2–C3 106.2(3), N2–C3–C2 106.4(3), C2–C3–P3 124.0(3), C3–C2–P1 124.7(3), P1–P2–P3 107.5(1), P1–P2–W1 125.1(1), P3–P2–W1 107.5(1), P2–W1–C36 87.7(1), P2–W1–C37 91.9(1), P2–W1–C38 177.7(1), P2–W1–C39 88.3(2), P2–W1–C40 88.1(1).



**Table S2.** Crystallographic details of **1b** and **4a**.

|                                             | <b>1b</b>                                                      | <b>4a</b>                                                     |
|---------------------------------------------|----------------------------------------------------------------|---------------------------------------------------------------|
| Empirical formula                           | C <sub>34</sub> H <sub>43</sub> BrN <sub>2</sub>               | C <sub>33</sub> H <sub>39</sub> N <sub>2</sub> P <sub>3</sub> |
| Formula weight                              | 559.61                                                         | 556.57                                                        |
| Crystal system                              | monoclinic                                                     | monoclinic                                                    |
| Space group                                 | P2 <sub>1</sub> /c                                             | C2/c                                                          |
| a/Å                                         | 10.3786(2)                                                     | 10.5947(8)                                                    |
| b/Å                                         | 15.7209(3)                                                     | 16.2615(8)                                                    |
| c/Å                                         | 19.3197(3)                                                     | 17.8991(13)                                                   |
| β/°                                         | 100.6678(18)                                                   | 97.414(7)                                                     |
| Volume/Å <sup>3</sup>                       | 3097.75(10)                                                    | 3058.0(4)                                                     |
| Z                                           | 4                                                              | 4                                                             |
| ρ <sub>calc</sub> / g/cm <sup>3</sup>       | 1.200                                                          | 1.209                                                         |
| μ/mm <sup>-1</sup>                          | 1.350                                                          | 1.959                                                         |
| F(000)                                      | 1184.0                                                         | 1184.0                                                        |
| Crystal size / mm <sup>3</sup>              | 0.27 × 0.19 × 0.07                                             | 0.17 × 0.03 × 0.02                                            |
| Radiation                                   | MoKα (λ = 0.71073)                                             | CuKα (λ = 1.54184)                                            |
| 2θ range for data collection                | 3.364 to 64.324                                                | 9.966 to 153.092                                              |
| Index ranges                                | -15 ≤ h ≤ 15<br>-22 ≤ k ≤ 22<br>-28 ≤ l ≤ 28                   | -12 ≤ h ≤ 13<br>-20 ≤ k ≤ 20<br>-22 ≤ l ≤ 22                  |
| Reflections collected                       | 76135                                                          | 5324                                                          |
| Independent reflections                     | 10359 [R <sub>int</sub> = 0.0379, R <sub>sigma</sub> = 0.0268] | 5324 [R <sub>int</sub> = 0.0747, R <sub>sigma</sub> = 0.0869] |
| Reflections with I > 2σ(I)                  | 8477                                                           | 3981                                                          |
| Completeness up to θ full                   | 0.999                                                          | 1.000                                                         |
| Data/restraints/parameters                  | 10359/0/342                                                    | 5324/0/179                                                    |
| Goodness-of-fit on F <sup>2</sup>           | 1.043                                                          | 1.068                                                         |
| Final R indexes [ I > 2σ(I) ]               | R <sub>1</sub> = 0.0357, wR <sub>2</sub> = 0.0815              | R <sub>1</sub> = 0.0437, wR <sub>2</sub> = 0.1184             |
| Final R indexes [all data]                  | R <sub>1</sub> = 0.0510, wR <sub>2</sub> = 0.0874              | R <sub>1</sub> = 0.0610, wR <sub>2</sub> = 0.1298             |
| Largest diff. peak/hole / e Å <sup>-3</sup> | 0.96/-0.68                                                     | 0.32/-0.31                                                    |
| CCDC number                                 | 1939608                                                        | 1939609                                                       |

**Table S3.** Crystallographic details of **4b** and **4c**.

|                                             | <b>4b</b>                                                     | <b>4c</b> (toluene)                                           |
|---------------------------------------------|---------------------------------------------------------------|---------------------------------------------------------------|
| Empirical formula                           | C <sub>34</sub> H <sub>41</sub> N <sub>2</sub> P <sub>3</sub> | C <sub>41</sub> H <sub>49</sub> N <sub>2</sub> P <sub>3</sub> |
| Formula weight                              | 570.60                                                        | 662.73                                                        |
| Crystal system                              | monoclinic                                                    | orthorhombic                                                  |
| Space group                                 | C2/c                                                          | P2 <sub>1</sub> 2 <sub>1</sub> 2 <sub>1</sub>                 |
| a/Å                                         | 10.8550(3)                                                    | 11.1499(5)                                                    |
| b/Å                                         | 15.5962(3)                                                    | 17.6614(8)                                                    |
| c/Å                                         | 19.1059(4)                                                    | 19.2232(6)                                                    |
| β/°                                         | 102.358(2)                                                    | 90                                                            |
| Volume/Å <sup>3</sup>                       | 3159.62(13)                                                   | 3785.5(3)                                                     |
| Z                                           | 4                                                             | 4                                                             |
| ρ <sub>calc</sub> / g/cm <sup>3</sup>       | 1.200                                                         | 1.163                                                         |
| μ/mm-1                                      | 0.213                                                         | 1.659                                                         |
| F(000)                                      | 1216.0                                                        | 1416.0                                                        |
| Crystal size/mm <sup>3</sup>                | 0.29 x 0.21 x 0.11                                            | 0.15 × 0.11 × 0.09                                            |
| Radiation                                   | MoKα (λ = 0.71073)                                            | CuKα (λ = 1.54184)                                            |
| 2θ range for data collection                | 5.224 to 65.648                                               | 6.796 to 153.536                                              |
| Index ranges                                | -16 ≤ h ≤ 16<br>-23 ≤ k ≤ 23<br>-29 ≤ l ≤ 28                  | -13 ≤ h ≤ 13<br>-21 ≤ k ≤ 19<br>-23 ≤ l ≤ 24                  |
| Reflections collected                       | 70658                                                         | 31369                                                         |
| Independent reflections                     | 5715 [R <sub>int</sub> = 0.0394, R <sub>sigma</sub> = 0.0210] | 7770 [R <sub>int</sub> = 0.0500, R <sub>sigma</sub> = 0.0417] |
| Reflections with I > 2σ(I)                  | 4716                                                          | 7012                                                          |
| Completeness up to θ full                   | 0.998                                                         | 0.999                                                         |
| Data/restraints/parameters                  | 5715/0/234                                                    | 7770/0/491                                                    |
| Goodness-of-fit on F <sup>2</sup>           | 1.070                                                         | 1.037                                                         |
| Final R indexes [ I > 2σ(I) ]               | R <sub>1</sub> = 0.0388, wR <sub>2</sub> = 0.0970             | R <sub>1</sub> = 0.0509, wR <sub>2</sub> = 0.1214             |
| Final R indexes [all data]                  | R <sub>1</sub> = 0.0521, wR <sub>2</sub> = 0.1052             | R <sub>1</sub> = 0.0566, wR <sub>2</sub> = 0.1253             |
| Largest diff. peak/hole / e Å <sup>-3</sup> | 0.61/-0.26                                                    | 0.29/-0.45                                                    |
| CCDC number                                 | 1939610                                                       | 1939611                                                       |

**Table S4.** Crystallographic details of **5a** and **5b**.

|                                             | <b>5a</b> (toluene)                                                            | <b>5b</b> (toluene)                                                            |
|---------------------------------------------|--------------------------------------------------------------------------------|--------------------------------------------------------------------------------|
| Empirical formula                           | C <sub>44</sub> H <sub>47</sub> FeN <sub>2</sub> O <sub>4</sub> P <sub>3</sub> | C <sub>45</sub> H <sub>49</sub> FeN <sub>2</sub> O <sub>4</sub> P <sub>3</sub> |
| Formula weight                              | 816.59                                                                         | 830.62                                                                         |
| Crystal system                              | monoclinic                                                                     | monoclinic                                                                     |
| Space group                                 | P2 <sub>1</sub> /c                                                             | P2 <sub>1</sub> /c                                                             |
| a/Å                                         | 10.9413(2)                                                                     | 10.83254(14)                                                                   |
| b/Å                                         | 23.5902(4)                                                                     | 24.9423(3)                                                                     |
| c/Å                                         | 16.2953(3)                                                                     | 16.03521(18)                                                                   |
| β/°                                         | 96.991(2)                                                                      | 96.0125(11)                                                                    |
| Volume / Å <sup>3</sup>                     | 4174.67(13)                                                                    | 4308.69(9)                                                                     |
| Z                                           | 4                                                                              | 4                                                                              |
| ρ <sub>calc</sub> / g/cm <sup>3</sup>       | 1.299                                                                          | 1.280                                                                          |
| μ/mm <sup>-1</sup>                          | 0.520                                                                          | 0.505                                                                          |
| F(000)                                      | 1712.0                                                                         | 1744.0                                                                         |
| Crystal size/mm <sup>3</sup>                | 0.37 × 0.27 × 0.18                                                             | 0.22 × 0.15 × 0.14                                                             |
| Radiation                                   | MoKα (λ = 0.71073)                                                             | MoKα (λ = 0.71073)                                                             |
| 2θ range for data collection                | 5.068 to 65.676                                                                | 5.052 to 65.760                                                                |
| Index ranges                                | -16 ≤ h ≤ 16<br>-35 ≤ k ≤ 35<br>-24 ≤ l ≤ 24                                   | -16 ≤ h ≤ 16<br>-38 ≤ k ≤ 37<br>-24 ≤ l ≤ 24                                   |
| Reflections collected                       | 127619                                                                         | 261252                                                                         |
| Independent reflections                     | 14823 [R <sub>int</sub> = 0.0417, R <sub>sigma</sub> = 0.0286]                 | 15612 [R <sub>int</sub> = 0.0435, R <sub>sigma</sub> = 0.0200]                 |
| Reflections with I > 2σ(I)                  | 12232                                                                          | 13655                                                                          |
| Completeness up to θ full                   | 0.999                                                                          | 0.999                                                                          |
| Data/restraints/parameters                  | 14823/15/549                                                                   | 15612/0/506                                                                    |
| Goodness-of-fit on F <sup>2</sup>           | 1.044                                                                          | 1.039                                                                          |
| Final R indexes [ I > 2σ(I) ]               | R <sub>1</sub> = 0.0344, wR <sub>2</sub> = 0.0756                              | R <sub>1</sub> = 0.0311, wR <sub>2</sub> = 0.0789                              |
| Final R indexes [all data]                  | R <sub>1</sub> = 0.0482, wR <sub>2</sub> = 0.0823                              | R <sub>1</sub> = 0.0386, wR <sub>2</sub> = 0.0827                              |
| Largest diff. peak/hole / e Å <sup>-3</sup> | 0.48/-0.32                                                                     | 0.55/-0.41                                                                     |
| CCDC number                                 | 1939612                                                                        | 1939613                                                                        |

**Table S5.** Crystallographic details of **6** and **7**.

|                                             | <b>6</b>                                                                       | <b>7</b> (2 toluene)                                                             |
|---------------------------------------------|--------------------------------------------------------------------------------|----------------------------------------------------------------------------------|
| Empirical formula                           | C <sub>38</sub> H <sub>39</sub> MoN <sub>2</sub> O <sub>5</sub> P <sub>3</sub> | C <sub>50.5</sub> H <sub>56</sub> N <sub>3</sub> O <sub>5</sub> P <sub>3</sub> W |
| Formula weight                              | 792.56                                                                         | 1061.74                                                                          |
| Crystal system                              | triclinic                                                                      | triclinic                                                                        |
| Space group                                 | P-1                                                                            | P-1                                                                              |
| a/Å                                         | 12.68020(10)                                                                   | 12.0860(2)                                                                       |
| b/Å                                         | 13.72590(10)                                                                   | 13.1486(2)                                                                       |
| c/Å                                         | 23.0210(2)                                                                     | 16.9350(2)                                                                       |
| α/°                                         | 93.5620(10)                                                                    | 106.1610(10)                                                                     |
| β/°                                         | 101.0270(10)                                                                   | 98.4870(10)                                                                      |
| γ/°                                         | 98.0390(10)                                                                    | 100.5390(10)                                                                     |
| Volume/Å <sup>3</sup>                       | 3877.80(6)                                                                     | 2484.47(7)                                                                       |
| Z                                           | 4                                                                              | 2                                                                                |
| ρ <sub>calc</sub> / g/cm <sup>3</sup>       | 1.358                                                                          | 1.419                                                                            |
| μ/mm <sup>-1</sup>                          | 0.505                                                                          | 5.599                                                                            |
| F(000)                                      | 1632.0                                                                         | 1078.0                                                                           |
| Crystal size/mm <sup>3</sup>                | 0.20 × 0.17 × 0.16                                                             | 0.18 × 0.14 × 0.07                                                               |
| Radiation                                   | MoKα (λ = 0.71073)                                                             | Cu Kα (λ = 1.54184)                                                              |
| 2θ range for data collection                | 5.214 to 65.692                                                                | 5.558 to 152.980                                                                 |
| Index ranges                                | -19 ≤ h ≤ 19<br>-19 ≤ k ≤ 20<br>-34 ≤ l ≤ 34                                   | -15 ≤ h ≤ 15<br>-16 ≤ k ≤ 16<br>-21 ≤ l ≤ 21                                     |
| Reflections collected                       | 240247                                                                         | 92149                                                                            |
| Independent reflections                     | 27490 [R <sub>int</sub> = 0.0347, R <sub>sigma</sub> = 0.0216]                 | 10372 [R <sub>int</sub> = 0.0474, R <sub>sigma</sub> = 0.0201]                   |
| Reflections with I > 2σ(I)                  | 24041                                                                          | 9927                                                                             |
| Completeness up to θ max                    | 0.999                                                                          | 1.000                                                                            |
| Data/restraints/parameters                  | 27490/0/899                                                                    | 10372/0/664                                                                      |
| Goodness-of-fit on F <sup>2</sup>           | 1.055                                                                          | 1.078                                                                            |
| Final R indexes [ I > 2σ(I) ]               | R <sub>1</sub> = 0.0279, wR <sub>2</sub> = 0.0619                              | R <sub>1</sub> = 0.0403, wR <sub>2</sub> = 0.1108                                |
| Final R indexes [all data]                  | R <sub>1</sub> = 0.0356, wR <sub>2</sub> = 0.0652                              | R <sub>1</sub> = 0.0416, wR <sub>2</sub> = 0.1120                                |
| Largest diff. peak/hole / e Å <sup>-3</sup> | 0.64/-0.58                                                                     | 3.38/-1.11                                                                       |
| CCDC number                                 | 1939614                                                                        | 1939615                                                                          |

## Computational details

All geometries were optimized with the Gaussian 16 program suite<sup>4</sup> using the DFT functional M06-2X<sup>5</sup> in combination with the Ahlrichs def2-SVP<sup>6</sup> basis function as implemented. The stationary points were located with the Berny algorithm using redundant internal coordinates. Analytical Hessians were computed to determine the nature of stationary points (zero imaginary frequencies for minima).<sup>7</sup> The electronic energies were improved by single point calculations at the M06-2X/def2-TZVPP level of theory.

The Wiberg Bond Indices (WBI)<sup>8</sup> and NPA<sup>9</sup> atomic partial charges have been calculated at the M06-2X/def2-TZVPP//M06-2X/def2-SVP level of theory using the NBO 3.1 interface of Gaussian.<sup>10</sup>

Plots of the anisotropy of induced current density (AICD) were done with the help of the AICD 2.0.1 program of Herges and coworkers<sup>11</sup> and based on M06-2X/def2-TZVPP//def2-SVP CSGT calculations with IOp(10/93=1) keyword in Gaussian 16.

Time-dependent density functional theory (Full-TDDFT) was employed to calculate excitation energies as implemented in ORCA 4.0.1.<sup>12</sup> We used the functional M06-2X in combination the def2-SVP basis sets. The solvent (CH<sub>2</sub>Cl<sub>2</sub>) was described by the conductor-like polarizable continuum model, CPCM.<sup>13</sup>

**Table S6.** Electronic energies of selected MOs of compounds **4a–4d** and **5a**, calculated at M06-2X/def2-TZVPP//M06-2X/def2-SVP level of theory.

| orbital       | energy / eV |       |       |       |       |
|---------------|-------------|-------|-------|-------|-------|
|               | 4a          | 4b    | 4c    | 4d    | 5a    |
| L+3           | +0.06       | +0.06 | +0.08 | +0.19 | -0.18 |
| L+2           | -0.08       | -0.06 | -0.04 | +0.10 | -0.54 |
| L+1           | -0.39       | -0.35 | -0.36 | -0.22 | -0.60 |
| L             | -1.25       | -1.19 | -1.16 | -0.82 | -1.51 |
| H             | -6.08       | -6.06 | -6.04 | -5.90 | -6.42 |
| H-1           | -6.61       | -6.58 | -6.55 | -6.31 | -6.65 |
| H-2           | -7.35       | -7.32 | -7.31 | -7.16 | -6.70 |
| H-3           | -7.50       | -7.48 | -7.46 | -7.33 | -7.27 |
| HOMO/LUMO gap | 4.83        | 4.87  | 4.88  | 5.08  | 4.90  |

**Table S7.** Wiberg bond indices (WBI) and natural population analysis (NPA) atomic charges of the main parts of compounds **4a–4d**, **5a** and **1a**, calculated at M06-2X/def2-TZVPP//def2-SVP level of theory. The numbering of the atoms is in accordance with Figure F4.

| bond        | WBI               |       |       |       |       |       |
|-------------|-------------------|-------|-------|-------|-------|-------|
|             | 4a                | 4b    | 4c    | 4d    | 5a    | 1a    |
| C1–N1/2     | 1.26              | 1.26  | 1.26  | 1.26  | 1.26  | 1.28  |
| C2–N1/C3–N2 | 1.04              | 1.04  | 1.04  | 1.04  | 1.06  | 1.14  |
| C2–C3       | 1.31              | 1.31  | 1.31  | 1.31  | 1.32  | 1.64  |
| C2–P1/C3–P3 | 1.18              | 1.18  | 1.18  | 1.18  | 1.16  | –     |
| P1/3–P2     | 1.40              | 1.40  | 1.40  | 1.40  | 1.35  | –     |
| Fe–P2       | –                 | –     | –     | –     | 0.77  | –     |
| atom        | NPA atomic charge |       |       |       |       |       |
| C1          | +0.44             | +0.44 | +0.44 | +0.46 | +0.44 | +0.47 |
| N1/N2       | –0.35             | –0.35 | –0.35 | –0.36 | –0.35 | –0.32 |
| C2/C3       | –0.24             | –0.24 | –0.24 | –0.24 | –0.23 | –0.04 |
| P1/P3       | +0.12             | +0.12 | +0.12 | +0.12 | +0.19 | –     |
| P2          | –0.10             | –0.10 | –0.10 | –0.10 | +0.25 | –     |

**Table S8.** Nuclear independent chemical shifts (NICS) for the C<sub>3</sub>N<sub>2</sub> and C<sub>2</sub>P<sub>3</sub> moieties of compounds **4a–4d** and **5a**, calculated at the M06-2X/def2-TZVPP//def2-SVP level of theory. NICS values are given for the center of the respective moiety (NICS(0)) as well as for distances of 1 (NICS(1)) and 2 Å (NICS(2)) perpendicular to the moieties. NICS values of benzene, representing a typical aromatic system, and cyclobutadiene (CBD), as a typical antiaromatic system, are given for comparison.

| C <sub>3</sub> N <sub>2</sub> /<br>C <sub>2</sub> P <sub>3</sub> | 4a               | 4b               | 4c               | 4d               | 5a              | C <sub>6</sub> H <sub>6</sub> / CBD |
|------------------------------------------------------------------|------------------|------------------|------------------|------------------|-----------------|-------------------------------------|
| NICS(0)                                                          | –7.08/<br>–10.19 | –7.29/<br>–10.31 | –7.29/<br>–10.31 | –6.77/<br>–10.37 | –7.57/<br>–9.95 | –7.53/ 33.21                        |
| NICS(1)                                                          | –5.94/<br>–10.18 | –6.11/<br>–10.28 | –6.11/<br>–10.23 | –5.64/<br>–10.21 | –6.29/<br>–9.58 | –10.19/<br>21.09                    |
| NICS(2)                                                          | –2.43/<br>–5.51  | –2.53/<br>–5.21  | –2.53/<br>–5.53  | –2.36/<br>–5.52  | –2.52/<br>–5.12 | –5.22/ 4.98                         |

**Table S9.** Wavelength ( $\lambda$ ), oscillator strength ( $f$ ) and main assignment of the TD-PCM(CH<sub>2</sub>Cl<sub>2</sub>)/M06-2X/def2-SVP results for compound **4a**; threshold for printing excitations was chosen to be  $f \geq 0.10$ .

| state no. | $\lambda$ / nm | $f$    | Assignment                             |
|-----------|----------------|--------|----------------------------------------|
| 2         | 366.5          | 0.2561 | H-1 $\rightarrow$ L ( $c = 0.8582$ )   |
| 27        | 235.9          | 0.1000 | H-9 $\rightarrow$ L ( $c = 0.4638$ )   |
| 38        | 233.5          | 0.2152 | H-2 $\rightarrow$ L+3 ( $c = 0.3649$ ) |
| 44        | 221.8          | 0.1289 | H-2 $\rightarrow$ L+7 ( $c = 0.2205$ ) |
| 46        | 225.6          | 0.1858 | H-6 $\rightarrow$ L+1 ( $c = 0.6336$ ) |
| 47        | 219.9          | 0.1170 | H-2 $\rightarrow$ L+5 ( $c = 0.2327$ ) |
| 49        | 218.2          | 0.1450 | H-2 $\rightarrow$ L+5 ( $c = 0.3151$ ) |

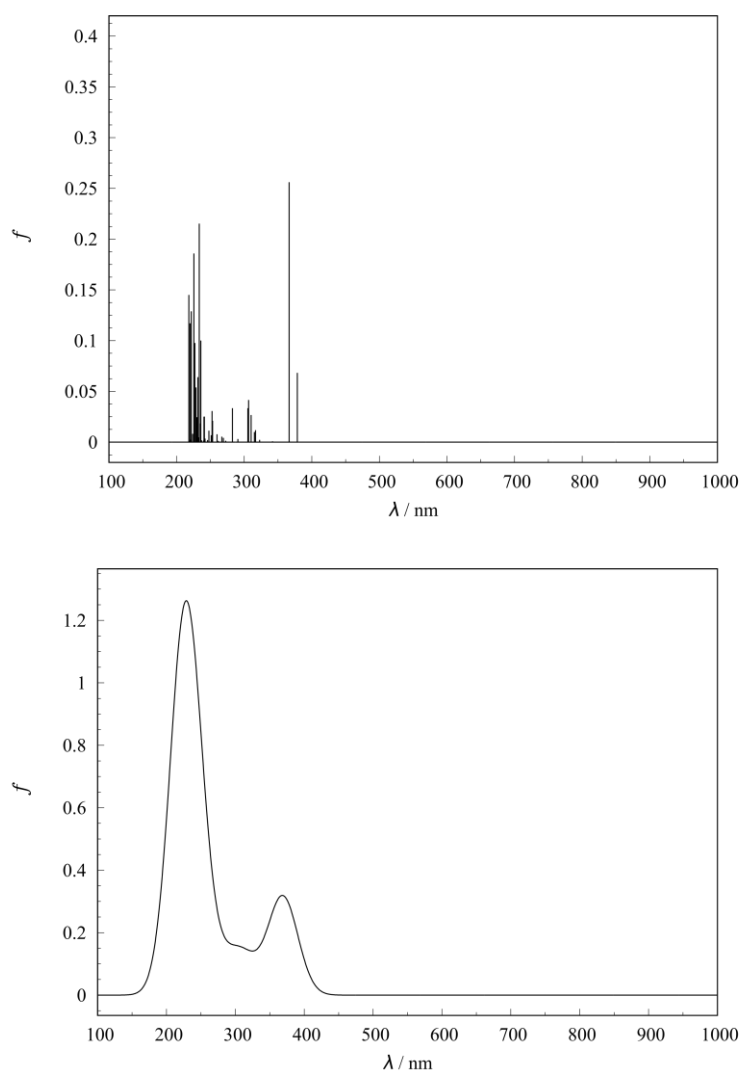

**Fig. S52** UV-visible spectrum (lines: top; Gaussian line broadening with a full width at half maximum (fwhm) of 50 cm<sup>-1</sup>: bottom) of **4a** calculated at TD-PCM(CH<sub>2</sub>Cl<sub>2</sub>)/M06-2X/def2-SVP.

**Table S10.** Wavelength ( $\lambda$ ), oscillator strength ( $f$ ) and main assignment of the TD-PCM(CH<sub>2</sub>Cl<sub>2</sub>)/M06-2X/def2-SVP results for compound **4b**; threshold for printing excitations was chosen to be  $f \geq 0.10$ .

| state no. | $\lambda$ / nm | $f$    | Assignment                             |
|-----------|----------------|--------|----------------------------------------|
| 2         | 364.3          | 0.2607 | H-1 $\rightarrow$ L ( $c = 0.8622$ )   |
| 35        | 227.6          | 0.1561 | H-6 $\rightarrow$ L+2 ( $c = 0.1462$ ) |
| 36        | 227.7          | 0.1348 | H-2 $\rightarrow$ L+5 ( $c = 0.1518$ ) |
| 38        | 231.4          | 0.2272 | H-2 $\rightarrow$ L+3 ( $c = 0.3917$ ) |
| 45        | 220.6          | 0.1342 | H-2 $\rightarrow$ L+7 ( $c = 0.1440$ ) |
| 47        | 219.4          | 0.1033 | H-2 $\rightarrow$ L+5 ( $c = 0.2788$ ) |

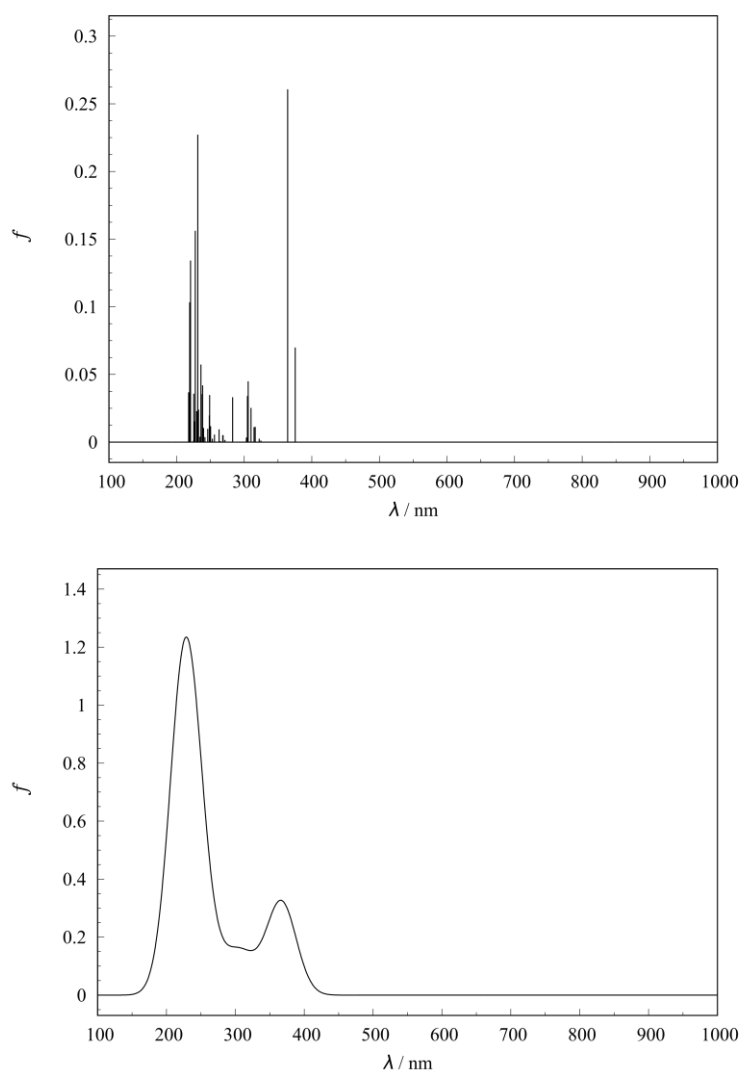

**Fig. S53** UV-visible spectrum (lines: top; Gaussian line broadening with a full width at half maximum (fwhm) of 50 cm<sup>-1</sup>: bottom) of **4b** calculated at TD-PCM(CH<sub>2</sub>Cl<sub>2</sub>)/M06-2X/def2-SVP.



**Table S11.** Wavelength ( $\lambda$ ), oscillator strength ( $f$ ) and main assignment of the TD-PCM(CH<sub>2</sub>Cl<sub>2</sub>)/M06-2X/def2-SVP results for compound **4c**; threshold for printing excitations was chosen to be  $f \geq 0.10$ .

| state no. | $\lambda$ / nm | $f$    | Assignment                             |
|-----------|----------------|--------|----------------------------------------|
| 2         | 361.5          | 0.2992 | H-1 $\rightarrow$ L ( $c = 0.8667$ )   |
| 38        | 233.3          | 0.2111 | H-2 $\rightarrow$ L+3 ( $c = 0.3440$ ) |
| 45        | 220.7          | 0.2299 | H-6 $\rightarrow$ L+1 ( $c = 0.1828$ ) |
| 47        | 219.7          | 0.1075 | H-2 $\rightarrow$ L+4 ( $c = 0.1957$ ) |

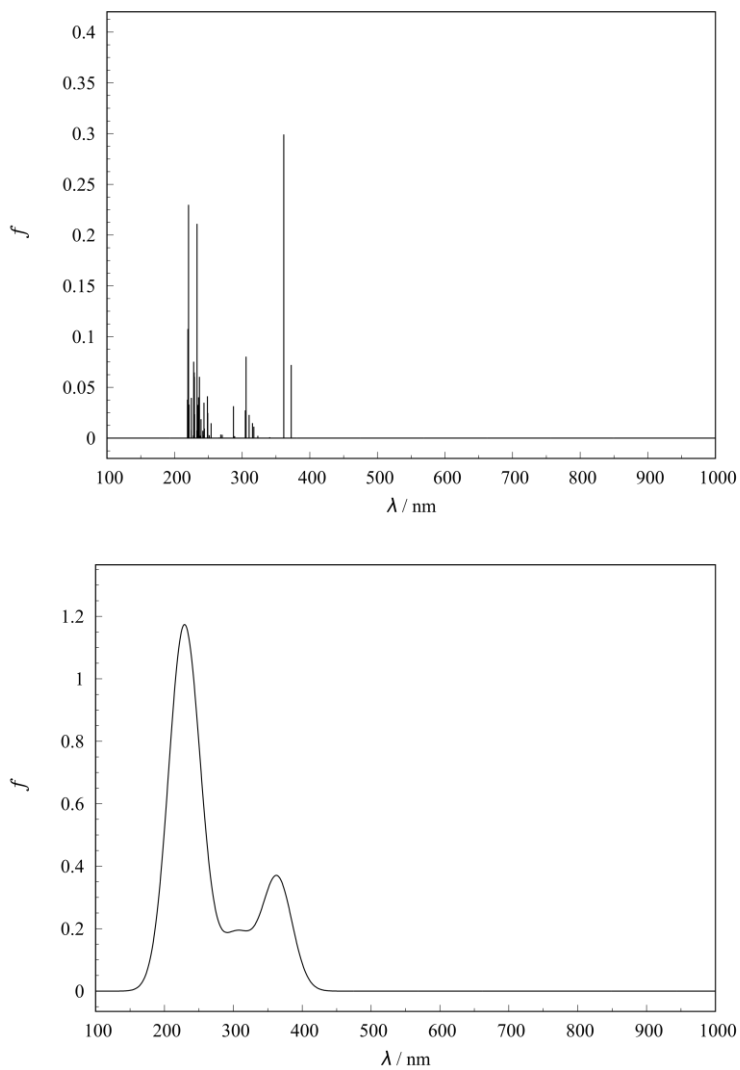

**Fig. S54** UV-visible spectrum (lines: top; Gaussian line broadening with a full width at half maximum (fwhm) of 50 cm<sup>-1</sup>: bottom) of **4c** calculated at TD-PCM(CH<sub>2</sub>Cl<sub>2</sub>)/M06-2X/def2-SVP.

**Table S12.** Wavelength ( $\lambda$ ), oscillator strength ( $f$ ) and main assignment of the TD-PCM(CH<sub>2</sub>Cl<sub>2</sub>)/M06-2X/def2-SVP results for compound **4d**; threshold for printing excitations was chosen to be  $f \geq 0.10$ .

| state no. | $\lambda$ / nm | $f$    | Assignment                             |
|-----------|----------------|--------|----------------------------------------|
| 2         | 347.5          | 0.6039 | H-1 $\rightarrow$ L ( $c = 0.8967$ )   |
| 5         | 302.4          | 0.1161 | H-1 $\rightarrow$ L+1 ( $c = 0.5010$ ) |
| 43        | 229.0          | 0.2769 | H-3 $\rightarrow$ L+3 ( $c = 0.5477$ ) |
| 50        | 218.9          | 0.1498 | H $\rightarrow$ L+8 ( $c = 0.5420$ )   |

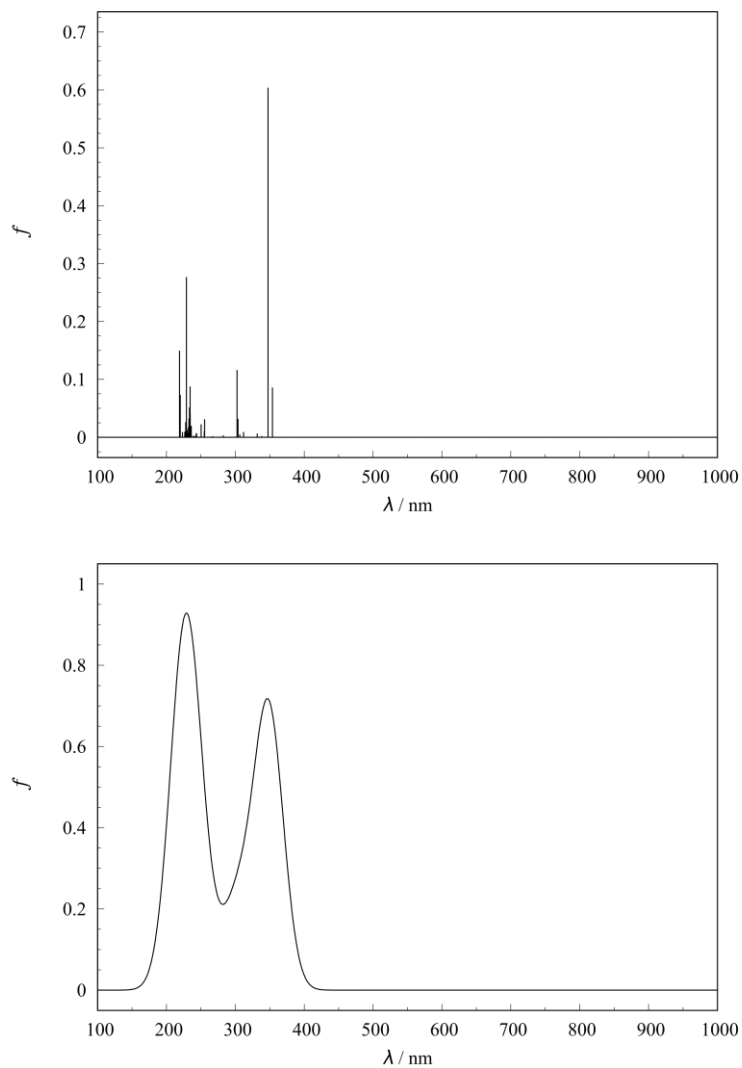

**Fig. S55** UV-visible spectrum (lines: top; Gaussian line broadening with a full width at half maximum (fwhm) of 50 cm<sup>-1</sup>: bottom) of **4d** calculated at TD-PCM(CH<sub>2</sub>Cl<sub>2</sub>)/M06-2X/def2-SVP.

**Table S13.** Wavelength ( $\lambda$ ), oscillator strength ( $f$ ) and main assignment of the TD-PCM(CH<sub>2</sub>Cl<sub>2</sub>)/M06-2X/def2-SVP results for compound **5a**; threshold for printing excitations was chosen to be  $f \geq 0.07$ .

| state no. | $\lambda$ / nm | $f$    | Assignment                             |
|-----------|----------------|--------|----------------------------------------|
| 6         | 429.3          | 0.1456 | H $\rightarrow$ L ( $c = 0.4725$ )     |
| 9         | 367.7          | 0.0760 | H-2 $\rightarrow$ L+8 ( $c = 0.4109$ ) |
| 10        | 355.1          | 0.0701 | H-1 $\rightarrow$ L ( $c = 0.9218$ )   |
| 13        | 313.2          | 0.2923 | H-3 $\rightarrow$ L ( $c = 0.5462$ )   |
| 39        | 240.0          | 0.0754 | H-1 $\rightarrow$ L+2 ( $c = 0.2765$ ) |

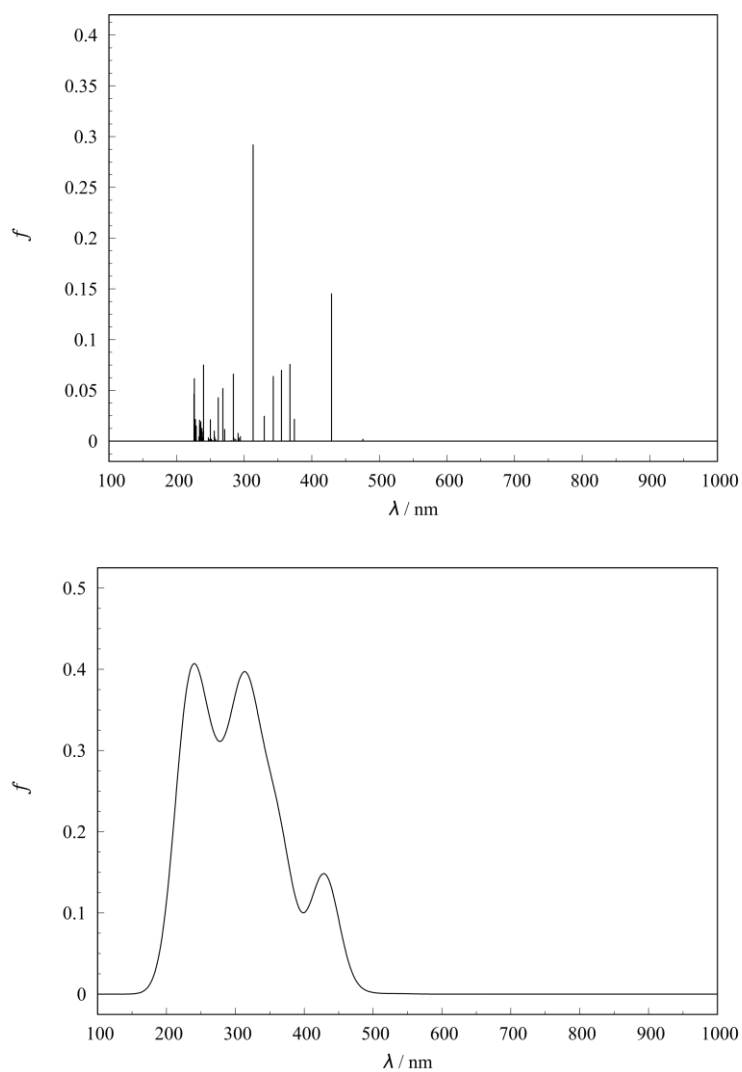

**Fig. S56** UV-visible spectrum (lines: top; Gaussian line broadening with a full width at half maximum (fwhm) of 50 cm<sup>-1</sup>: bottom) of **5a** calculated at TD-PCM(CH<sub>2</sub>Cl<sub>2</sub>)/M06-2X/def2-SVP.

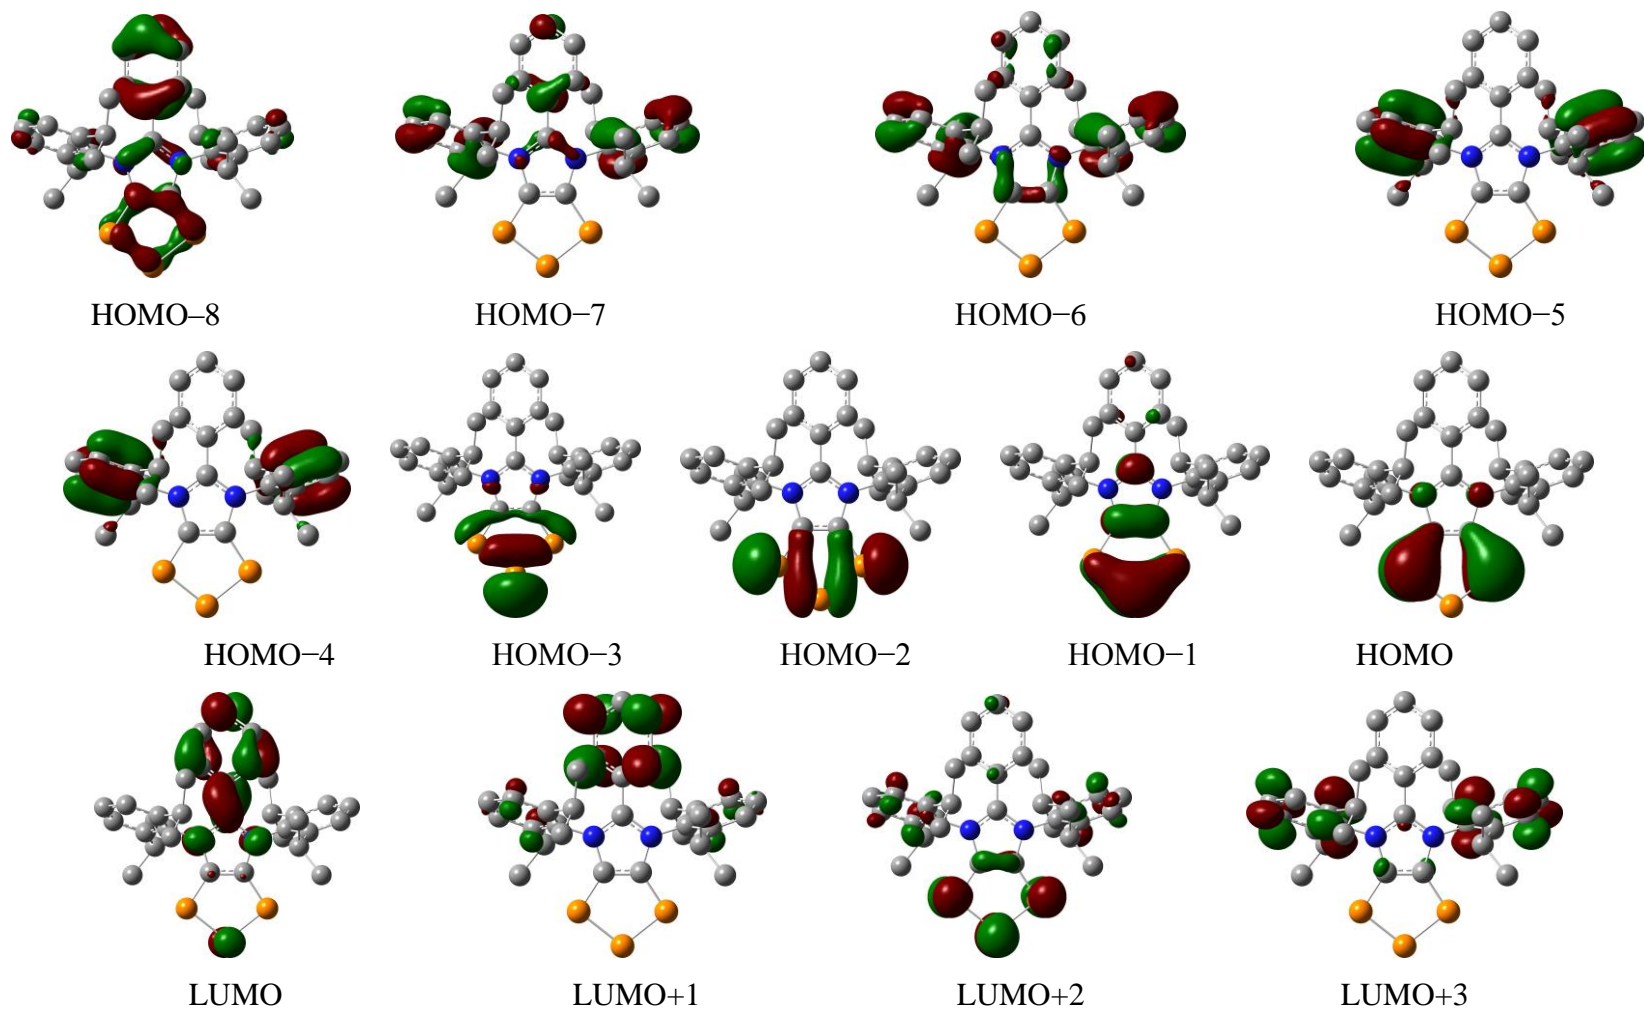

**Fig. S57** Selected molecular orbitals (from HOMO-8 to LUMO+3) of compound **4a**, calculated at M06-2X/def2-TZVPP//def2-SVP. The isovalue was arbitrarily chosen to be 0.04. Hydrogen atoms were omitted for clarity reasons.

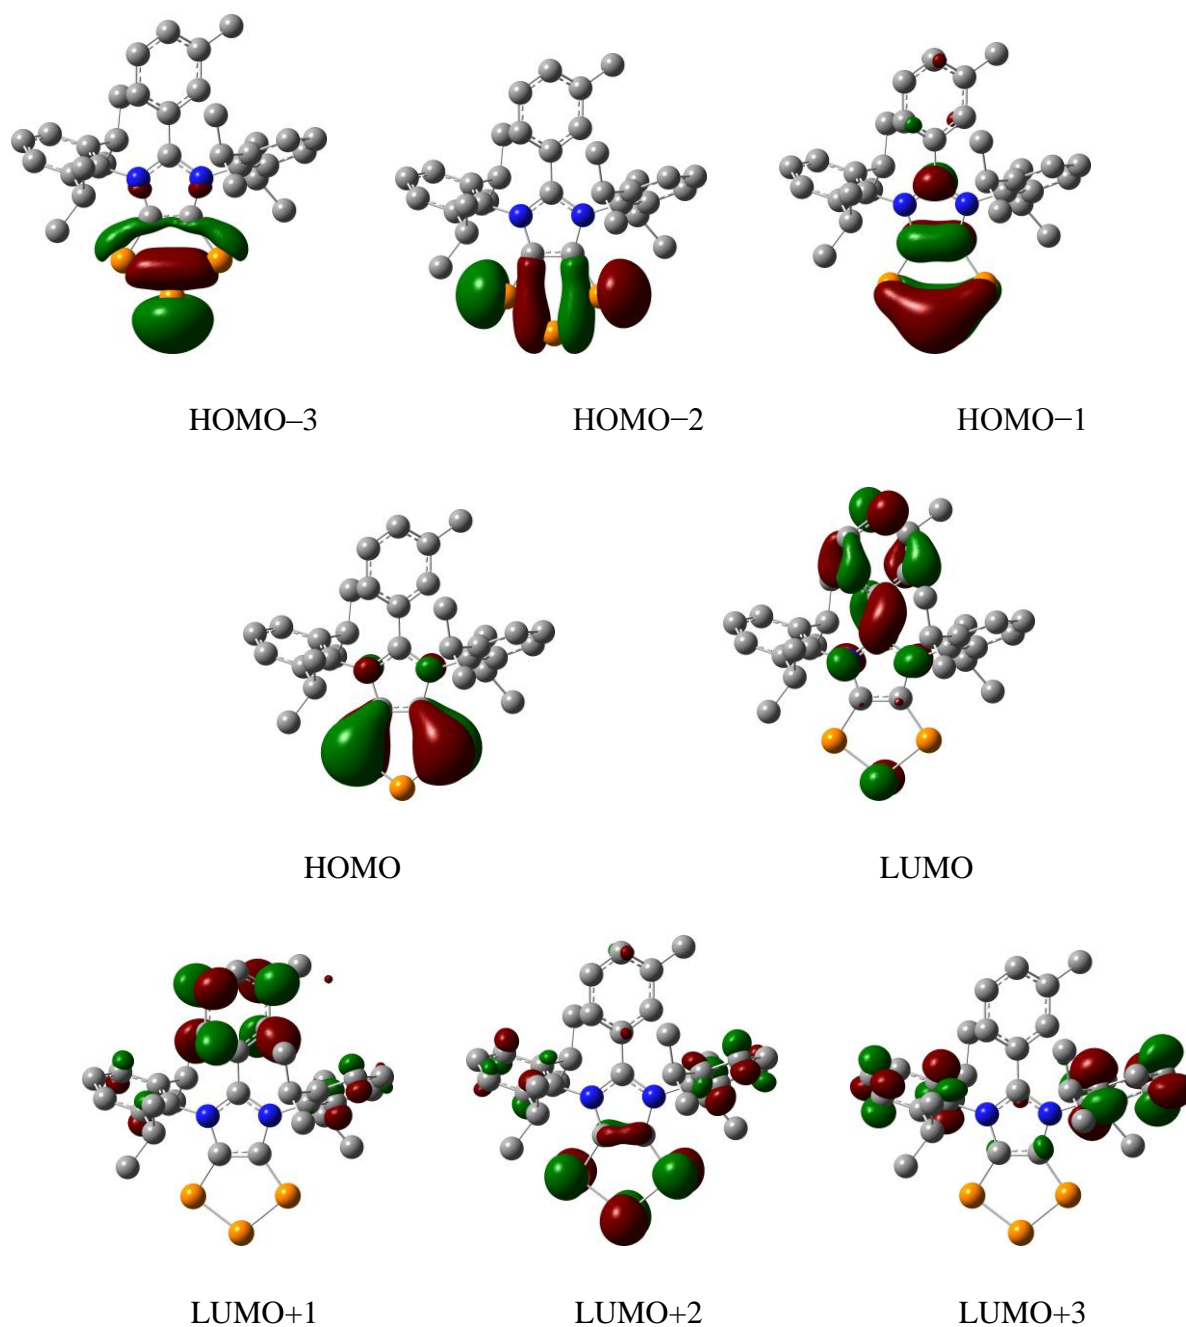

**Fig. S58** Selected molecular orbitals (from HOMO-3 to LUMO+3) of compound **4b**, calculated at M06-2X/def2-TZVPP//def2-SVP. The isovalue was arbitrarily chosen to be 0.04. Hydrogen atoms were omitted for clarity reasons.

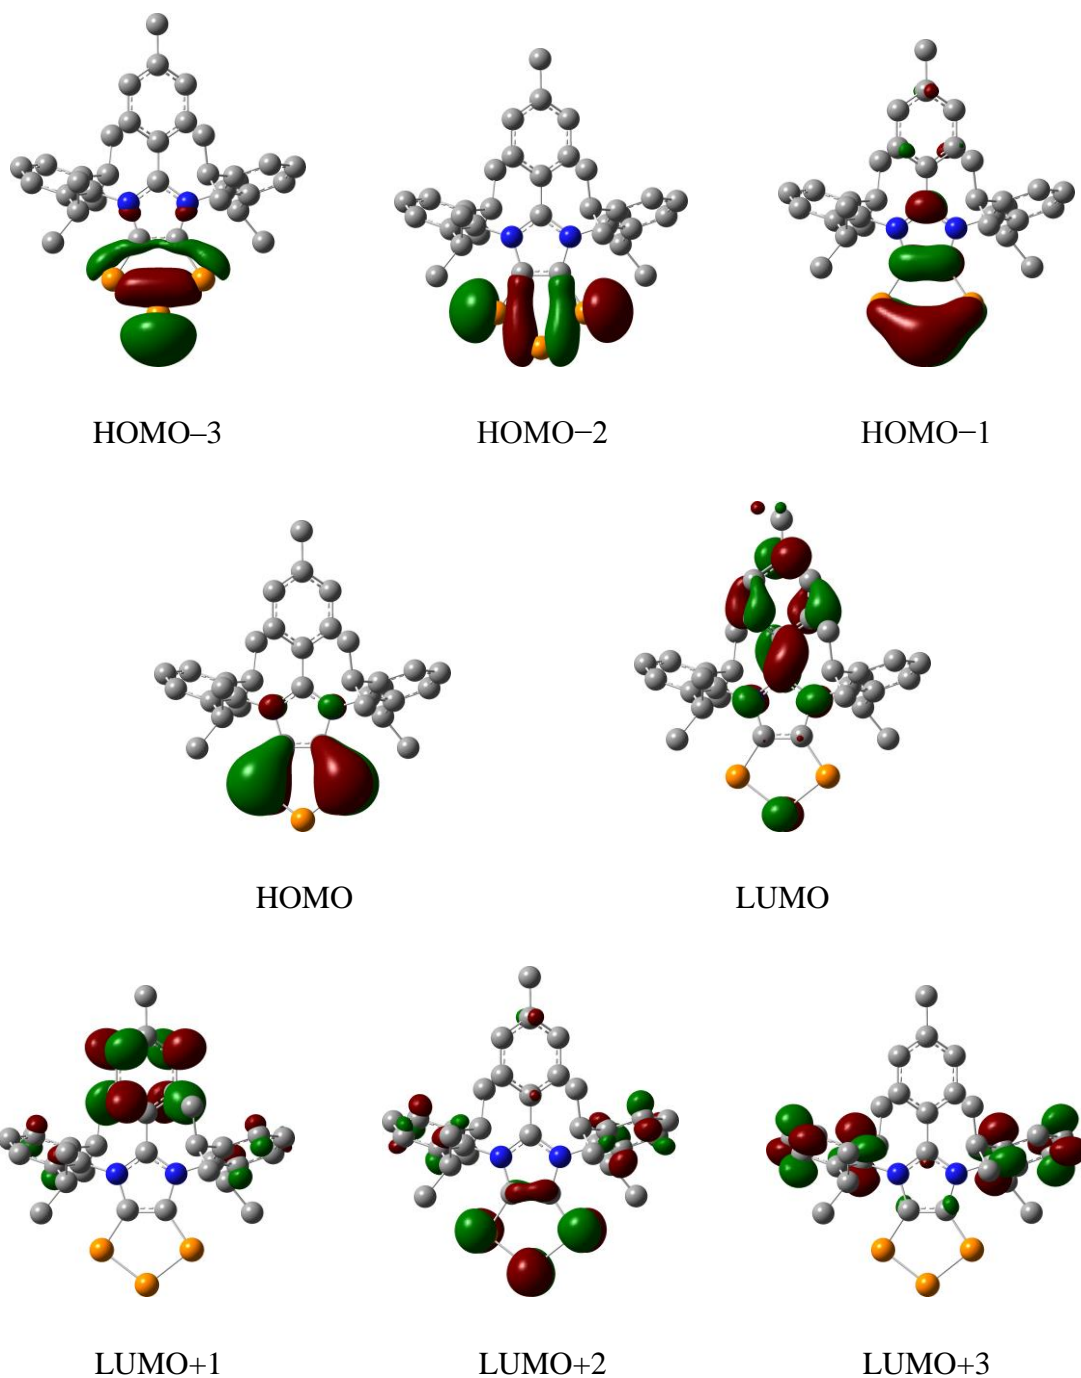

**Fig. S59** Selected molecular orbitals (from HOMO-3 to LUMO+3) of compound **4c**, calculated at M06-2X/def2-TZVPP//def2-SVP. The isovalue was arbitrarily chosen to be 0.04. Hydrogen atoms were omitted for clarity reasons.

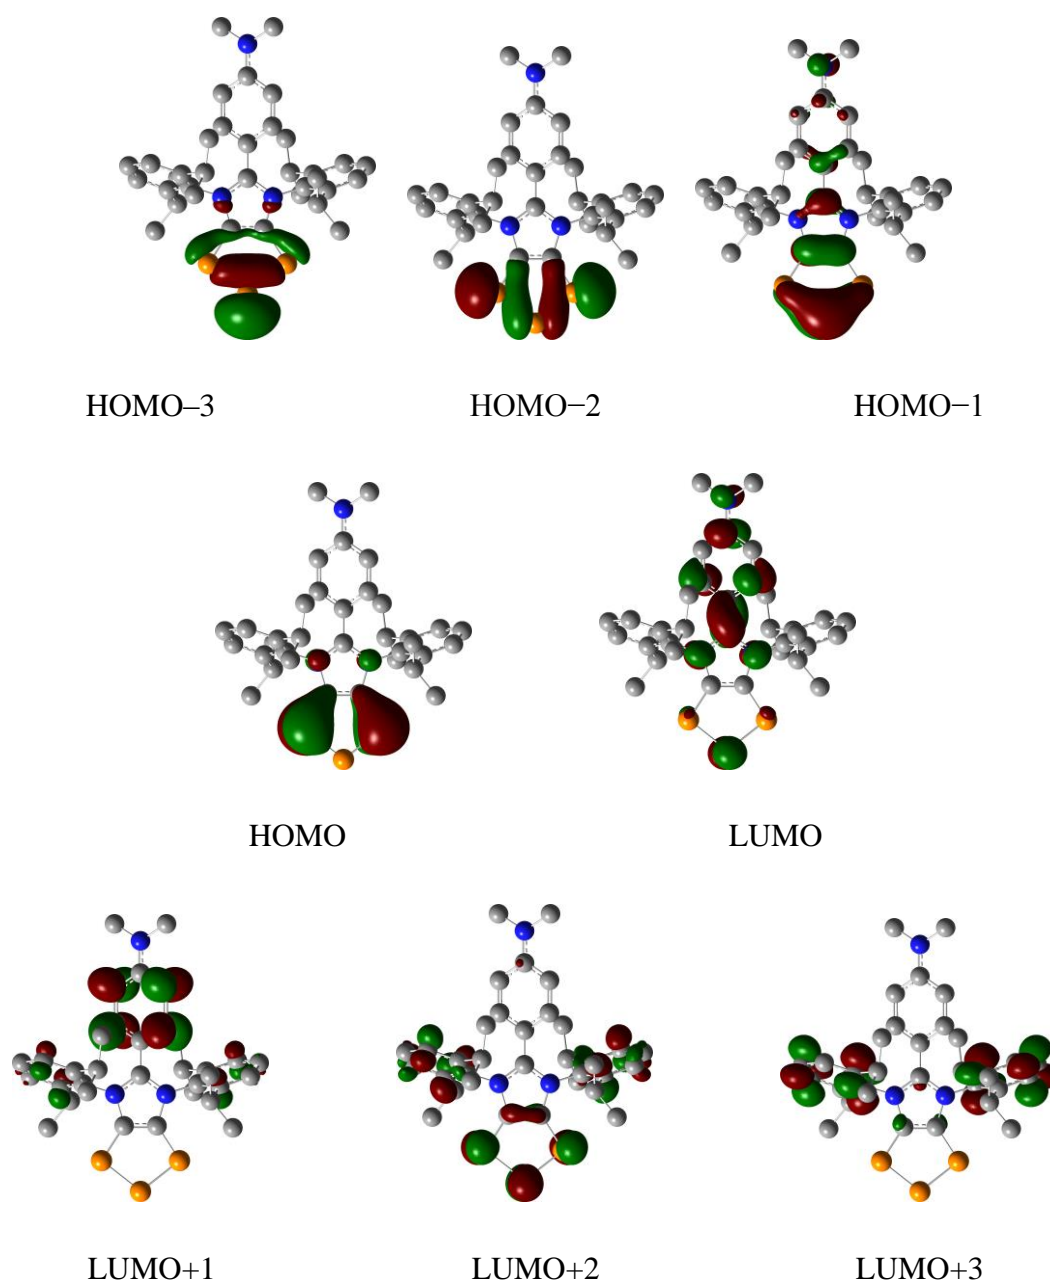

**Fig. S60** Selected molecular orbitals (from HOMO-3 to LUMO+3) of compound **4d**, calculated at M06-2X/def2-TZVPP//def2-SVP. The isovalue was arbitrarily chosen to be 0.04. Hydrogen atoms were omitted for clarity reasons.

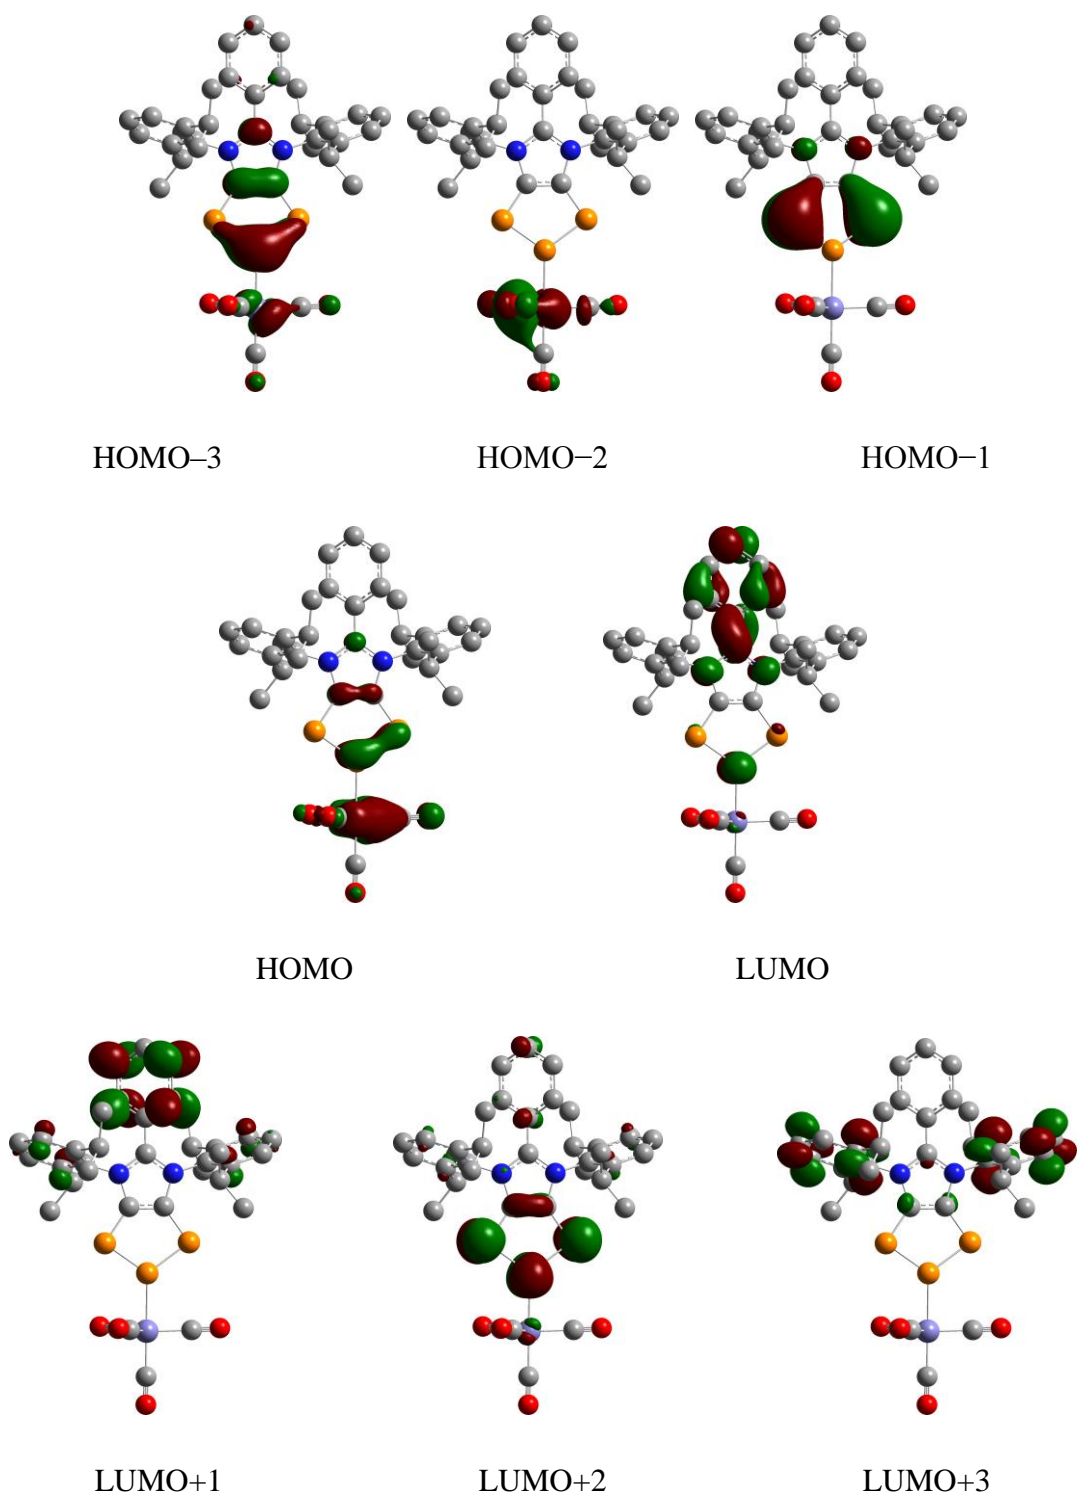

**Fig. S61** Selected molecular orbitals (from HOMO-3 to LUMO+3) of compound **5a**, calculated at M06-2X/def2-TZVPP//def2-SVP. The isovalue was arbitrarily chosen to be 0.04. Hydrogen atoms were omitted for clarity reasons.



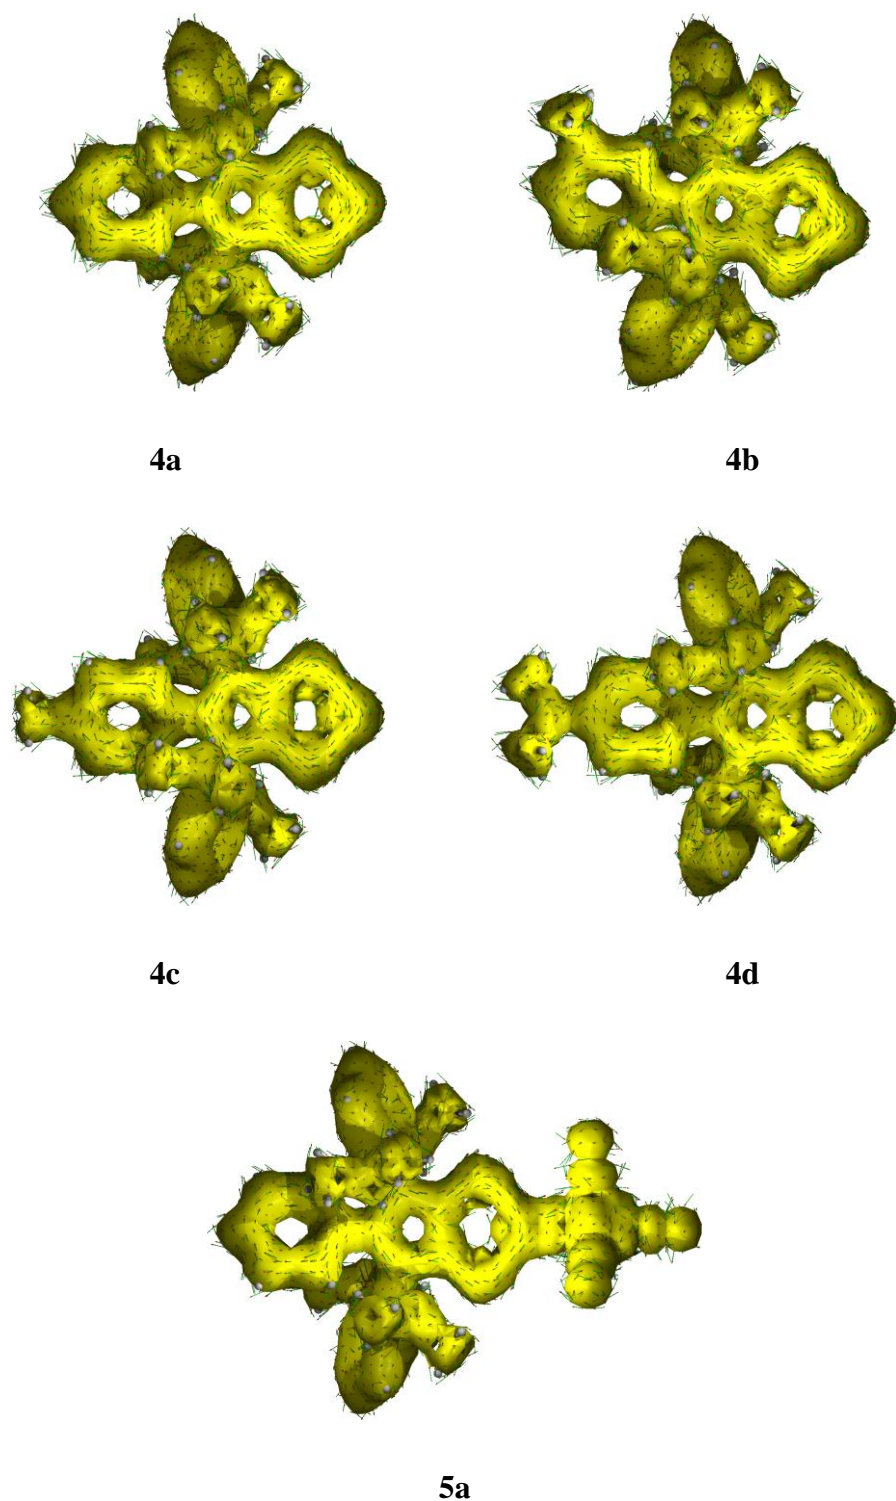

**Fig. S62** AICD plots (based on M06-2X/def2-TZVPP//def2-SVP calculations) of compounds **4a–4d** and **5a**. The isovalue was arbitrarily chosen to be 0.03, the magnetic field is orthogonal to the  $C_2P_3$  plane and points towards the viewer, thus clockwise ring currents represent aromatic systems whereas counterclockwise ring currents are indicative for antiaromatic systems.

**Table S14.** Cartesian Coordinates of compound **4a** (in Å), calculated at M06-2X/def2-SVP level of theory, including positions of the NICS dummy atoms (Bq). ( $E = -2412.6322178$ ,  $\nu_{\min} = 16.5 \text{ cm}^{-1}$ )

|   |           |           |           |
|---|-----------|-----------|-----------|
| P | -1.651916 | -3.191784 | 0.206029  |
| P | -0.000007 | -4.491167 | -0.000019 |
| C | -0.697239 | -1.714832 | 0.072855  |
| P | 1.651905  | -3.191787 | -0.206067 |
| N | -1.084730 | -0.370667 | 0.081113  |
| C | 0.697231  | -1.714834 | -0.072878 |
| C | -0.000000 | 0.423194  | 0.000002  |
| C | -2.440257 | 0.061126  | 0.269769  |
| N | 1.084727  | -0.370670 | -0.081119 |
| C | 0.000004  | 1.895690  | 0.000010  |
| C | -3.342828 | -0.075087 | -0.800146 |
| C | -2.804125 | 0.595707  | 1.515866  |
| C | 2.440256  | 0.061123  | -0.269768 |
| C | -1.034264 | 2.609033  | -0.626509 |
| C | 1.034277  | 2.609020  | 0.626533  |
| C | -4.646705 | 0.385533  | -0.597273 |
| C | -2.949828 | -0.663442 | -2.148350 |
| C | -4.120675 | 1.042778  | 1.663462  |
| C | -1.843137 | 0.675674  | 2.690513  |
| C | 3.342824  | -0.075107 | 0.800147  |
| C | 2.804127  | 0.595722  | -1.515857 |
| H | -1.844817 | 2.078540  | -1.122041 |
| C | -1.030893 | 4.000897  | -0.624391 |
| H | 1.844827  | 2.078518  | 1.122060  |
| C | 1.030916  | 4.000884  | 0.624427  |
| H | -5.373057 | 0.302959  | -1.408020 |
| C | -5.031814 | 0.945740  | 0.617347  |
| H | -1.932266 | -1.070307 | -2.064720 |
| C | -3.871053 | -1.825901 | -2.532078 |
| C | -2.941937 | 0.406990  | -3.246738 |
| H | -4.436865 | 1.466428  | 2.618706  |
| H | -0.852298 | 0.333740  | 2.357169  |
| C | -2.289907 | -0.276050 | 3.805929  |
| C | -1.691883 | 2.113238  | 3.198095  |
| C | 4.646702  | 0.385514  | 0.597283  |
| C | 2.949821  | -0.663482 | 2.148341  |
| C | 4.120678  | 1.042793  | -1.663444 |
| C | 1.843143  | 0.675704  | -2.690506 |
| H | -1.840546 | 4.538539  | -1.118861 |
| C | 0.000014  | 4.702037  | 0.000021  |
| H | 1.840574  | 4.538517  | 1.118901  |
| H | -6.054610 | 1.300599  | 0.752211  |
| H | -3.887488 | -2.587966 | -1.741157 |
| H | -3.512746 | -2.298969 | -3.457581 |
| H | -4.900226 | -1.478160 | -2.710383 |
| H | -3.933037 | 0.874915  | -3.350809 |
| H | -2.681124 | -0.047513 | -4.213626 |
| H | -2.209364 | 1.202393  | -3.045006 |
| H | -3.275688 | 0.014939  | 4.199818  |
| H | -1.571705 | -0.253717 | 4.638635  |
| H | -2.359768 | -1.307727 | 3.433234  |
| H | -1.387182 | 2.795201  | 2.389892  |
| H | -0.933322 | 2.158027  | 3.993535  |
| H | -2.637516 | 2.485972  | 3.620387  |
| H | 5.373053  | 0.302927  | 1.408029  |
| C | 5.031814  | 0.945738  | -0.617328 |
| H | 1.932259  | -1.070346 | 2.064702  |
| C | 3.871045  | -1.825945 | 2.532055  |
| C | 2.941925  | 0.406935  | 3.246743  |
| H | 4.436871  | 1.466457  | -2.618681 |
| H | 0.852302  | 0.333767  | -2.357171 |
| C | 2.289917  | -0.276010 | -3.805930 |
| C | 1.691892  | 2.113273  | -3.198074 |
| H | 0.000018  | 5.792852  | 0.000025  |
| H | 6.054612  | 1.300598  | -0.752184 |
| H | 3.887482  | -2.587999 | 1.741123  |
| H | 3.512734  | -2.299027 | 3.457550  |
| H | 4.900217  | -1.478207 | 2.710369  |

|    |          |           |           |
|----|----------|-----------|-----------|
| H  | 3.933023 | 0.874861  | 3.350825  |
| H  | 2.681108 | -0.047580 | 4.213625  |
| H  | 2.209351 | 1.202340  | 3.045019  |
| H  | 3.275702 | 0.014980  | -4.199809 |
| H  | 1.571721 | -0.253665 | -4.638641 |
| H  | 2.359772 | -1.307691 | -3.433246 |
| H  | 1.387187 | 2.795227  | -2.389864 |
| H  | 0.933334 | 2.158070  | -3.993516 |
| H  | 2.637526 | 2.486011  | -3.620358 |
| Bq | 0.000000 | -2.861000 | 0.000000  |
| Bq | 0.121000 | -2.861000 | 0.993000  |
| Bq | 0.242000 | -2.861000 | 1.986000  |
| Bq | 0.000000 | -0.750000 | 0.000000  |
| Bq | 0.083000 | -0.750000 | 0.997000  |
| Bq | 0.166000 | -0.750000 | 1.994000  |

**Table S15.** Cartesian Coordinates of compound **4b** (in Å), calculated at M06-2X/def2-SVP level of theory, including positions of the NICS dummy atoms (Bq). ( $E = -2451.8998374$ ,  $\nu_{\min} = 13.5 \text{ cm}^{-1}$ )

|   |           |           |           |
|---|-----------|-----------|-----------|
| P | 1.068075  | -3.532852 | -0.095343 |
| P | -0.749770 | -4.539488 | -0.471927 |
| C | 0.347630  | -1.923149 | -0.083051 |
| P | -2.183190 | -2.991414 | -0.563183 |
| N | 0.929230  | -0.661072 | 0.080510  |
| C | -1.025653 | -1.697622 | -0.252759 |
| C | -0.023425 | 0.291156  | 0.067987  |
| C | 2.326808  | -0.459208 | 0.337226  |
| N | -1.209646 | -0.317025 | -0.119400 |
| C | 0.195907  | 1.738440  | 0.226297  |
| C | 2.724580  | -0.112448 | 1.638200  |
| C | 3.233831  | -0.611987 | -0.726817 |
| C | -2.478978 | 0.333750  | -0.275883 |
| C | 1.347388  | 2.336399  | -0.302554 |
| C | -0.735133 | 2.536949  | 0.909585  |
| C | 4.086193  | 0.121632  | 1.853420  |
| C | 1.748361  | -0.005414 | 2.798020  |
| C | 4.583230  | -0.369011 | -0.455560 |
| C | 2.803395  | -0.987974 | -2.138039 |
| C | -2.720440 | 1.055332  | -1.455774 |
| C | -3.423282 | 0.217873  | 0.759771  |
| H | 2.076473  | 1.731372  | -0.839023 |
| C | 1.591360  | 3.705009  | -0.161144 |
| C | -0.499494 | 3.899670  | 1.054525  |
| H | -1.636320 | 2.098332  | 1.332799  |
| H | 4.429234  | 0.395566  | 2.853053  |
| C | 5.006675  | 0.001281  | 0.817780  |
| H | 0.730242  | -0.169325 | 2.415575  |
| C | 1.786325  | 1.386309  | 3.437924  |
| C | 2.020873  | -1.109792 | 3.825338  |
| H | 5.314988  | -0.471463 | -1.259222 |
| H | 1.733267  | -1.238054 | -2.118354 |
| C | 3.549887  | -2.232851 | -2.628267 |
| C | 2.998707  | 0.179576  | -3.113627 |
| C | -3.949875 | 1.711729  | -1.567181 |
| C | -1.721746 | 1.123096  | -2.599417 |
| C | -4.636608 | 0.891829  | 0.595122  |
| C | -3.161839 | -0.568034 | 2.037381  |
| C | 2.832278  | 4.311399  | -0.761253 |
| C | 0.653462  | 4.480635  | 0.526888  |
| H | -1.222371 | 4.514248  | 1.592134  |
| H | 6.065019  | 0.187697  | 1.006116  |
| H | 2.761493  | 1.577763  | 3.911214  |
| H | 1.016911  | 1.466370  | 4.220097  |
| H | 1.606782  | 2.176757  | 2.693426  |
| H | 1.955425  | -2.102205 | 3.357527  |
| H | 1.287290  | -1.060630 | 4.643337  |
| H | 3.024978  | -1.001287 | 4.263071  |
| H | 3.419112  | -3.067295 | -1.926053 |
| H | 4.626245  | -2.033094 | -2.744583 |
| H | 3.159228  | -2.543694 | -3.607819 |
| H | 2.391302  | 1.055152  | -2.840281 |
| H | 2.704865  | -0.124959 | -4.128704 |
| H | 4.053284  | 0.493969  | -3.148596 |
| H | -4.169588 | 2.284482  | -2.470315 |
| C | -4.896546 | 1.637332  | -0.551180 |
| H | -0.806064 | 0.594144  | -2.296992 |
| C | -2.272836 | 0.391838  | -3.828640 |
| C | -1.335965 | 2.569619  | -2.925819 |
| H | -5.390849 | 0.831010  | 1.381948  |
| H | -2.218123 | -1.118497 | 1.918105  |
| C | -3.015170 | 0.363667  | 3.246818  |
| C | -4.261351 | -1.606239 | 2.282373  |
| H | -5.849847 | 2.157229  | -0.656848 |
| H | -1.533334 | 0.400411  | -4.642771 |
| H | -3.189206 | 0.877451  | -4.197423 |
| H | -2.511845 | -0.653135 | -3.585775 |
| H | -0.955087 | 3.094621  | -2.036672 |

|    |           |           |           |
|----|-----------|-----------|-----------|
| H  | -2.199773 | 3.132828  | -3.310757 |
| H  | -0.555645 | 2.588956  | -3.701170 |
| H  | -2.163010 | 1.050771  | 3.138298  |
| H  | -2.852255 | -0.227066 | 4.160079  |
| H  | -3.923812 | 0.967772  | 3.393593  |
| H  | -5.229034 | -1.123703 | 2.488940  |
| H  | -4.004441 | -2.226322 | 3.153138  |
| H  | -4.374598 | -2.266957 | 1.412151  |
| H  | 0.829024  | 5.551143  | 0.651913  |
| H  | 3.021411  | 5.314612  | -0.358558 |
| H  | 2.732149  | 4.399803  | -1.853809 |
| H  | 3.711378  | 3.683487  | -0.559909 |
| Bq | -0.509000 | -2.937000 | -0.293000 |
| Bq | -0.662000 | -3.024000 | 0.691000  |
| Bq | -0.815000 | -3.111000 | 1.675000  |
| Bq | -0.196000 | -0.908000 | -0.061000 |
| Bq | -0.312000 | -1.002000 | 0.928000  |
| Bq | -0.428000 | -1.096000 | 1.917000  |

**Table S16.** Cartesian Coordinates of compound **4c** (in Å), calculated at M06-2X/def2-SVP level of theory, including positions of the NICS dummy atoms (Bq). ( $E = -2451.8998366$ ,  $\nu_{\min} = 16.5 \text{ cm}^{-1}$ )

|   |           |           |           |
|---|-----------|-----------|-----------|
| P | 1.662266  | -3.359298 | 0.204715  |
| P | 0.014098  | -4.663944 | 0.001533  |
| C | 0.703217  | -1.885173 | 0.072874  |
| P | -1.641541 | -3.368942 | -0.202640 |
| N | 1.086862  | -0.539366 | 0.081222  |
| C | -0.690904 | -1.889276 | -0.071906 |
| C | 0.000004  | 0.251727  | -0.000514 |
| C | 2.440951  | -0.103694 | 0.269102  |
| N | -1.082272 | -0.545736 | -0.081374 |
| C | -0.004481 | 1.722924  | -0.001655 |
| C | 2.804198  | 0.433197  | 1.514414  |
| C | 3.343414  | -0.238184 | -0.801070 |
| C | -2.438798 | -0.117761 | -0.269123 |
| C | 1.027743  | 2.443986  | -0.618478 |
| C | -1.043191 | 2.439297  | 0.616303  |
| C | 4.119604  | 0.883936  | 1.660916  |
| C | 1.842940  | 0.514018  | 2.688766  |
| C | 4.646253  | 0.225940  | -0.599414 |
| C | 2.950141  | -0.827011 | -2.148937 |
| C | -2.805405 | 0.416414  | -1.514600 |
| C | -3.340095 | -0.256393 | 0.801548  |
| H | 1.846925  | 1.922111  | -1.109124 |
| C | 1.017389  | 3.835906  | -0.615866 |
| C | -1.041252 | 3.828161  | 0.612477  |
| H | -1.858005 | 1.911597  | 1.108026  |
| H | 4.435029  | 1.309519  | 2.615587  |
| C | 5.030565  | 0.788226  | 0.614499  |
| H | 0.854689  | 0.162681  | 2.357637  |
| C | 1.681549  | 1.954152  | 3.186186  |
| C | 2.296426  | -0.426302 | 3.811050  |
| H | 5.372308  | 0.144629  | -1.410553 |
| H | 1.935596  | -1.240602 | -2.062587 |
| C | 3.877158  | -1.982926 | -2.538017 |
| C | 2.930988  | 0.245979  | -3.244661 |
| C | -4.123207 | 0.860305  | -1.660719 |
| C | -1.845389 | 0.500603  | -2.689738 |
| C | -4.645368 | 0.200932  | 0.600269  |
| C | -2.943172 | -0.842476 | 2.149545  |
| H | 1.831094  | 4.373603  | -1.106025 |
| C | -0.013260 | 4.554626  | -0.003082 |
| H | -1.857667 | 4.361857  | 1.103558  |
| H | 6.052533  | 1.145812  | 0.748545  |
| H | 2.625466  | 2.336953  | 3.603416  |
| H | 0.924498  | 1.998715  | 3.983135  |
| H | 1.369451  | 2.627495  | 2.373532  |
| H | 2.374463  | -1.459996 | 3.445709  |
| H | 1.577514  | -0.403717 | 4.643148  |
| H | 3.279623  | -0.125056 | 4.203711  |
| H | 3.900316  | -2.746520 | -1.748697 |
| H | 4.903787  | -1.629001 | -2.718859 |
| H | 3.518753  | -2.456220 | -3.463376 |
| H | 2.193688  | 1.035632  | -3.037524 |
| H | 2.669587  | -0.207736 | -4.211790 |
| H | 3.918502  | 0.720996  | -3.351057 |
| H | -4.441336 | 1.283518  | -2.615545 |
| C | -5.033129 | 0.760581  | -0.613787 |
| H | -0.854780 | 0.156122  | -2.358506 |
| C | -2.293948 | -0.445157 | -3.809447 |
| C | -1.693120 | 1.940496  | -3.190606 |
| H | -5.370623 | 0.116338  | 1.411791  |
| H | -1.926353 | -1.250437 | 2.063108  |
| C | -2.929793 | 0.230959  | 3.244922  |
| C | -3.863649 | -2.003414 | 2.539215  |
| C | -0.031418 | 6.058834  | -0.000119 |
| H | -6.056992 | 1.112826  | -0.747534 |
| H | -1.575864 | -0.420071 | -4.642185 |
| H | -3.279340 | -0.150952 | -4.201955 |
| H | -2.365252 | -1.478446 | -3.441574 |
| H | -1.384662 | 2.617580  | -2.379681 |

|    |           |           |           |
|----|-----------|-----------|-----------|
| H  | -2.639516 | 2.316560  | -3.608356 |
| H  | -0.936689 | 1.987901  | -3.987956 |
| H  | -2.197127 | 1.024789  | 3.037306  |
| H  | -2.665443 | -0.220966 | 4.212088  |
| H  | -3.919995 | 0.700297  | 3.351549  |
| H  | -4.892189 | -1.655138 | 2.720170  |
| H  | -3.502389 | -2.474410 | 3.464635  |
| H  | -3.882714 | -2.767367 | 1.750136  |
| H  | 0.859649  | 6.470767  | -0.490010 |
| H  | -0.069736 | 6.447359  | 1.027863  |
| H  | -0.919022 | 6.438863  | -0.526920 |
| Bq | 0.009000  | -3.033000 | 0.001000  |
| Bq | -0.111000 | -3.033000 | 0.994000  |
| Bq | -0.231000 | -3.033000 | 1.987000  |
| Bq | 0.003000  | -0.922000 | 0.000000  |
| Bq | -0.080000 | -0.922000 | 0.997000  |
| Bq | -0.163000 | -0.922000 | 1.994000  |

**Table S17.** Cartesian Coordinates of compound **4d** (in Å), calculated at M06-2X/def2-SVP level of theory, including positions of the NICS dummy atoms (Bq). ( $E = -2546.4439887$ ,  $\nu_{\min} = 11.7 \text{ cm}^{-1}$ )

|   |           |           |           |
|---|-----------|-----------|-----------|
| P | -3.701488 | -1.649741 | -0.210689 |
| P | -5.003303 | 0.000040  | 0.000006  |
| C | -2.224826 | -0.695668 | -0.076772 |
| P | -3.701460 | 1.649801  | 0.210692  |
| N | -0.878218 | -1.083355 | -0.091807 |
| C | -2.224814 | 0.695703  | 0.076773  |
| C | -0.081493 | -0.000001 | -0.000003 |
| C | -0.448124 | -2.435023 | -0.299538 |
| N | -0.878200 | 1.083367  | 0.091804  |
| C | 1.384404  | -0.000012 | -0.000006 |
| C | -0.580757 | -3.351833 | 0.758505  |
| C | 0.082757  | -2.783934 | -1.551585 |
| C | -0.448082 | 2.435027  | 0.299538  |
| C | 2.115197  | -1.051632 | 0.578309  |
| C | 2.115210  | 1.051598  | -0.578323 |
| C | -0.119945 | -4.652949 | 0.538762  |
| C | -1.162134 | -2.972052 | 2.113328  |
| C | 0.531371  | -4.097868 | -1.716708 |
| C | 0.159961  | -1.807190 | -2.713207 |
| C | -0.580704 | 3.351843  | -0.758501 |
| C | 0.082809  | 2.783926  | 1.551585  |
| H | 1.597406  | -1.888704 | 1.042901  |
| C | 3.500239  | -1.057468 | 0.583119  |
| H | 1.597429  | 1.888678  | -1.042911 |
| C | 3.500252  | 1.057414  | -0.583138 |
| H | -0.200271 | -5.389366 | 1.340646  |
| C | 0.438065  | -5.022285 | -0.681849 |
| H | -1.583845 | -1.960251 | 2.036008  |
| C | -2.308639 | -3.908700 | 2.506076  |
| C | -0.079230 | -2.950108 | 3.199150  |
| H | 0.952736  | -4.401401 | -2.677174 |
| H | -0.199107 | -0.826297 | -2.369261 |
| C | -0.773969 | -2.252352 | -3.844022 |
| C | 1.600322  | -1.629054 | -3.204202 |
| C | -0.119872 | 4.652951  | -0.538755 |
| C | -1.162093 | 2.972076  | -2.113322 |
| C | 0.531444  | 4.097852  | 1.716711  |
| C | 0.160001  | 1.807177  | 2.713204  |
| H | 4.010787  | -1.896426 | 1.050879  |
| C | 4.239441  | -0.000034 | -0.000014 |
| H | 4.010810  | 1.896367  | -1.050897 |
| H | 0.793371  | -6.043095 | -0.830455 |
| H | -3.078966 | -3.929576 | 1.723145  |
| H | -2.775865 | -3.559594 | 3.438091  |
| H | -1.948148 | -4.934888 | 2.676407  |
| H | 0.404724  | -3.934464 | 3.295426  |
| H | -0.525496 | -2.697228 | 4.172086  |
| H | 0.701916  | -2.205120 | 2.986989  |
| H | -0.464575 | -3.227602 | -4.250109 |
| H | -0.755001 | -1.521609 | -4.665898 |
| H | -1.807896 | -2.343078 | -3.482317 |
| H | 2.267615  | -1.317356 | -2.386433 |
| H | 1.640722  | -0.864908 | -3.994703 |
| H | 1.992313  | -2.566394 | -3.628092 |
| H | -0.200189 | 5.389372  | -1.340636 |
| C | 0.438148  | 5.022275  | 0.681855  |
| H | -1.583817 | 1.960280  | -2.036003 |
| C | -2.308587 | 3.908741  | -2.506062 |
| C | -0.079194 | 2.950119  | -3.199149 |
| H | 0.952817  | 4.401375  | 2.677176  |
| H | -0.199088 | 0.826291  | 2.369258  |
| C | -0.773914 | 2.252354  | 3.844026  |
| C | 1.600361  | 1.629012  | 3.204191  |
| N | 5.606601  | -0.000045 | -0.000020 |
| H | 0.793471  | 6.043079  | 0.830464  |
| H | -3.078910 | 3.929625  | -1.723127 |
| H | -2.775822 | 3.559645  | -3.438076 |
| H | -1.948081 | 4.934925  | -2.676391 |
| H | 0.404773  | 3.934469  | -3.295424 |



|    |           |           |           |
|----|-----------|-----------|-----------|
| H  | -0.525467 | 2.697248  | -4.172084 |
| H  | 0.701943  | 2.205121  | -2.986993 |
| H  | -0.464498 | 3.227598  | 4.250113  |
| H  | -0.754954 | 1.521609  | 4.665900  |
| H  | -1.807841 | 2.343101  | 3.482328  |
| H  | 2.267644  | 1.317303  | 2.386417  |
| H  | 1.640751  | 0.864863  | 3.994690  |
| H  | 1.992372  | 2.566344  | 3.628080  |
| C  | 6.325460  | -1.099801 | 0.602097  |
| C  | 6.325473  | 1.099730  | -0.602085 |
| H  | 6.087035  | 2.059371  | -0.113809 |
| H  | 6.095918  | 1.199265  | -1.676230 |
| H  | 7.401818  | 0.925487  | -0.500117 |
| H  | 6.086993  | -2.059461 | 0.113875  |
| H  | 6.095920  | -1.199276 | 1.676252  |
| H  | 7.401806  | -0.925588 | 0.500099  |
| Bq | -3.371000 | 0.000000  | 0.000000  |
| Bq | -3.371000 | -0.124000 | 0.992000  |
| Bq | -3.371000 | -0.248000 | 1.984000  |
| Bq | -1.258000 | 0.000000  | 0.000000  |
| Bq | -1.258000 | -0.092000 | 0.996000  |
| Bq | -1.258000 | -0.184000 | 1.992000  |

**Table S18.** Cartesian Coordinates of compound **5a** (in Å), calculated at M06-2X/def2-SVP level of theory, including positions of the NICS dummy atoms (Bq). ( $E = -4128.9310008$ ,  $\nu_{\min} = 8.2 \text{ cm}^{-1}$ )

|    |           |           |           |
|----|-----------|-----------|-----------|
| Fe | 5.210851  | 0.023213  | 0.000164  |
| P  | 2.868672  | 0.051938  | 0.018752  |
| C  | 5.162857  | 1.823141  | -0.261258 |
| C  | 5.156870  | -0.650681 | 1.691813  |
| C  | 5.113721  | -1.120629 | -1.415138 |
| C  | 7.051136  | 0.004609  | -0.025097 |
| P  | 1.614301  | 1.717857  | -0.197454 |
| P  | 1.655976  | -1.643086 | 0.228552  |
| O  | 5.085423  | 2.951447  | -0.422150 |
| O  | 5.096439  | -1.075265 | 2.749765  |
| O  | 5.023344  | -1.840716 | -2.296683 |
| O  | 8.187105  | -0.004304 | -0.041870 |
| C  | 0.164283  | 0.714377  | -0.061220 |
| C  | 0.180824  | -0.678384 | 0.086747  |
| N  | -1.181566 | 1.085498  | -0.076208 |
| N  | -1.155023 | -1.083070 | 0.091270  |
| C  | -1.962502 | -0.008895 | 0.004172  |
| C  | -1.627804 | 2.437694  | -0.266671 |
| C  | -1.567397 | -2.447655 | 0.268779  |
| C  | -3.434414 | -0.027604 | -0.002668 |
| C  | -2.163343 | 2.794117  | -1.514683 |
| C  | -1.502063 | 3.341463  | 0.803763  |
| C  | -1.408338 | -3.339698 | -0.807245 |
| C  | -2.104855 | -2.826917 | 1.509051  |
| C  | -4.130923 | -1.071271 | -0.632426 |
| C  | -4.162725 | 0.998205  | 0.620309  |
| C  | -2.619999 | 4.107056  | -1.664465 |
| C  | -2.238577 | 1.830645  | -2.687757 |
| C  | -1.972023 | 4.641472  | 0.597383  |
| C  | -0.916755 | 2.955473  | 2.155645  |
| C  | -1.845987 | -4.652973 | -0.614507 |
| C  | -0.822032 | -2.928189 | -2.151243 |
| C  | -2.528368 | -4.152439 | 1.645141  |
| C  | -2.216303 | -1.873940 | 2.687782  |
| C  | -5.522657 | -1.084930 | -0.637206 |
| C  | -5.554352 | 0.977077  | 0.611854  |
| C  | -2.531653 | 5.020298  | -0.619414 |
| C  | -1.303471 | 2.288348  | -3.812798 |
| C  | -3.678325 | 1.660297  | -3.183713 |
| C  | 0.227685  | 3.894228  | 2.551665  |
| C  | -1.995218 | 2.928943  | 3.246046  |
| C  | -2.406565 | -5.055240 | 0.594371  |
| C  | 0.350724  | -3.832515 | -2.544598 |
| C  | -1.891771 | -2.922211 | -3.250567 |
| C  | -1.281494 | -2.315828 | 3.819374  |
| C  | -3.664879 | -1.743539 | 3.169926  |
| C  | -6.239219 | -0.062676 | -0.016033 |
| H  | -3.588284 | -1.875397 | -1.125262 |
| H  | -3.644925 | 1.815591  | 1.118047  |
| H  | -6.104675 | 1.779684  | 1.103744  |
| H  | -7.329908 | -0.076252 | -0.021226 |
| H  | -2.775898 | 2.182149  | 3.039269  |
| H  | -2.481069 | 3.911737  | 3.345453  |
| H  | -1.543105 | 2.677132  | 4.216310  |
| H  | 0.994957  | 3.934021  | 1.766612  |
| H  | 0.702140  | 3.538022  | 3.477088  |
| H  | -0.139213 | 4.915458  | 2.735933  |
| H  | -0.494779 | 1.943671  | 2.075254  |
| H  | -1.897320 | 5.369738  | 1.407027  |
| H  | -2.893282 | 6.040312  | -0.756791 |
| H  | -3.044288 | 4.418832  | -2.620799 |
| H  | -1.881276 | 0.844426  | -2.356211 |
| H  | -4.065660 | 2.600944  | -3.603789 |
| H  | -4.350711 | 1.347769  | -2.370557 |
| H  | -3.719251 | 0.900856  | -3.978438 |
| H  | -1.612549 | 3.268355  | -4.206928 |
| H  | -1.323242 | 1.567712  | -4.643303 |
| H  | -0.268925 | 2.375200  | -3.451954 |
| H  | -4.336589 | -1.441964 | 2.352108  |

|    |           |           |           |
|----|-----------|-----------|-----------|
| H  | -3.733047 | -0.991348 | 3.969638  |
| H  | -4.032620 | -2.696808 | 3.579031  |
| H  | -1.880704 | -0.876782 | 2.366405  |
| H  | -1.569828 | -3.305975 | 4.203759  |
| H  | -1.327901 | -1.601768 | 4.654461  |
| H  | -0.241394 | -2.374145 | 3.468963  |
| H  | -2.953160 | -4.482318 | 2.595159  |
| H  | -2.742771 | -6.085304 | 0.720978  |
| H  | -1.745034 | -5.372959 | -1.428706 |
| H  | -0.428199 | -1.906030 | -2.060025 |
| H  | 0.013074  | -4.861602 | -2.740800 |
| H  | 1.112127  | -3.858088 | -1.753324 |
| H  | 0.824477  | -3.455607 | -3.462076 |
| H  | -2.349892 | -3.916983 | -3.361841 |
| H  | -1.438350 | -2.650659 | -4.214891 |
| H  | -2.694146 | -2.198455 | -3.044782 |
| H  | -6.048021 | -1.901004 | -1.134192 |
| Bq | 1.297000  | 0.033000  | 0.015000  |
| Bq | 1.293000  | 0.156000  | 1.007000  |
| Bq | 1.289000  | 0.289000  | 1.999000  |
| Bq | -0.791000 | 0.006000  | 0.009000  |
| Bq | -0.796000 | 0.091000  | 1.005000  |
| Bq | -0.801000 | 0.176000  | 2.001000  |

**Table S19.** Cartesian Coordinates of compound **1a** (in Å), calculated at M06-2X/def2-SVP level of theory. ( $E = -1389.9096992$ ,  $\nu_{\min} = 14.6 \text{ cm}^{-1}$ )

|   |           |           |           |
|---|-----------|-----------|-----------|
| C | -0.676507 | -0.067897 | -2.292540 |
| N | -1.078476 | -0.101706 | -0.973918 |
| C | 0.676466  | 0.068308  | -2.292540 |
| C | -0.000001 | 0.000012  | -0.176634 |
| C | -2.450341 | -0.271195 | -0.550836 |
| N | 1.078459  | 0.101877  | -0.973919 |
| C | 0.000014  | -0.000127 | 1.290572  |
| C | -3.323014 | 0.820992  | -0.700095 |
| C | -2.839837 | -1.511362 | -0.021049 |
| C | 2.450330  | 0.271300  | -0.550830 |
| C | -0.966085 | 0.736321  | 1.990221  |
| C | 0.966132  | -0.736706 | 1.990057  |
| C | -4.652659 | 0.626424  | -0.318441 |
| C | -2.874869 | 2.168114  | -1.247331 |
| C | -4.180584 | -1.643796 | 0.354088  |
| C | -1.890939 | -2.684769 | 0.159540  |
| C | 3.323006  | -0.820857 | -0.700296 |
| C | 2.839828  | 1.511375  | -0.020830 |
| H | -1.711878 | 1.318872  | 1.448758  |
| C | -0.961673 | 0.733598  | 3.381833  |
| H | 1.711915  | -1.319151 | 1.448466  |
| C | 0.961753  | -0.734250 | 3.381670  |
| H | -5.365969 | 1.445231  | -0.424638 |
| C | -5.078245 | -0.592699 | 0.201614  |
| H | -1.773898 | 2.175100  | -1.293214 |
| C | -3.407761 | 2.380548  | -2.669587 |
| C | -3.296363 | 3.325984  | -0.336500 |
| H | -4.526672 | -2.591974 | 0.769211  |
| H | -0.884457 | -2.380060 | -0.167039 |
| C | -2.311601 | -3.869027 | -0.717805 |
| C | -1.796001 | -3.089028 | 1.635486  |
| C | 4.652657  | -0.626348 | -0.318628 |
| C | 2.874858  | -2.167885 | -1.247760 |
| C | 4.180580  | 1.643750  | 0.354310  |
| C | 1.890926  | 2.684745  | 0.159980  |
| H | -1.709961 | 1.310667  | 3.925504  |
| C | 0.000048  | -0.000393 | 4.077455  |
| H | 1.710055  | -1.311421 | 3.925214  |
| H | -6.120581 | -0.722609 | 0.495128  |
| H | -3.089057 | 1.580204  | -3.352410 |
| H | -3.055465 | 3.339496  | -3.074791 |
| H | -4.507786 | 2.395432  | -2.669173 |
| H | -4.389674 | 3.436042  | -0.305982 |
| H | -2.882445 | 4.271219  | -0.714474 |
| H | -2.942889 | 3.186878  | 0.695498  |
| H | -3.304842 | -4.241349 | -0.427120 |
| H | -1.598361 | -4.698062 | -0.607178 |
| H | -2.354204 | -3.587453 | -1.779460 |
| H | -1.525958 | -2.233841 | 2.272566  |
| H | -1.037766 | -3.874386 | 1.767018  |
| H | -2.755263 | -3.490422 | 1.994389  |
| H | 5.365970  | -1.445134 | -0.424980 |
| C | 5.078244  | 0.592685  | 0.201635  |
| H | 1.773887  | -2.174868 | -1.293621 |
| C | 3.407722  | -2.380065 | -2.670065 |
| C | 3.296377  | -3.325913 | -0.337142 |
| H | 4.526669  | 2.591856  | 0.769596  |
| H | 0.884445  | 2.380095  | -0.166656 |
| C | 2.311584  | 3.869171  | -0.717140 |
| C | 1.795985  | 3.088724  | 1.636003  |
| H | 0.000061  | -0.000496 | 5.168197  |
| H | 6.120584  | 0.722548  | 0.495156  |
| H | 3.088996  | -1.579604 | -3.352741 |
| H | 3.055424  | -3.338944 | -3.075430 |
| H | 4.507747  | -2.394941 | -2.669676 |
| H | 4.389690  | -3.435970 | -0.306667 |
| H | 2.882456  | -4.271083 | -0.715272 |
| H | 2.942925  | -3.186989 | 0.694889  |
| H | 3.304823  | 4.241443  | -0.426382 |

|   |           |           |           |
|---|-----------|-----------|-----------|
| H | 1.598340  | 4.698181  | -0.606358 |
| H | 2.354191  | 3.587797  | -1.778848 |
| H | 1.525938  | 2.233417  | 2.272920  |
| H | 1.037750  | 3.874058  | 1.767682  |
| H | 2.755247  | 3.490048  | 1.994985  |
| H | -1.392234 | -0.149523 | -3.104349 |
| H | 1.392178  | 0.150084  | -3.104347 |

## References

1. O. V. Dolomanov, L. J. Bourhis, R. J. Gildea, J. A. K. Howard and H. Puschmann, *J. Appl. Cryst.* 2009 **42**, 339–341.
2. G. M. Sheldrick, *Acta Cryst. A* 2015, **71**, 3–8.
3. G. M. Sheldrick, *Acta Cryst. C* 2015, **71**, 3–8.
4. M. J. Frisch, G. W. Trucks, H. B. Schlegel, G. E. Scuseria, M. A. Robb, J. R. Cheeseman, G. Scalmani, V. Barone, B. Mennucci, G. A. Petersson, H. Nakatsuji, M. Caricato, X. Li, H. P. Hratchian, A. F. Izmaylov, J. Bloino, G. Zheng, J. L. Sonnenberg, M. Hada, M. Ehara, K. Toyota, R. Fukuda, J. Hasegawa, M. Ishida, T. Nakajima, Y. Honda, O. Kitao, H. Nakai, T. Vreven, J. J. A. Montgomery, J. E. Peralta, F. Ogliaro, M. Bearpark, J. J. Heyd, E. Brothers, K. N. Kudin, V. N. Staroverov, R. Kobayashi, J. Normand, K. Raghavachari, A. Rendell, J. C. Burant, S. S. Iyengar, J. Tomasi, M. Cossi, N. Rega, J. M. Millam, M. Klene, J. E. Knox, J. B. Cross, V. Bakken, C. Adamo, J. Jaramillo, R. Gomperts, R. E. Stratmann, O. Yazyev, A. J. Austin, R. Cammi, C. Pomelli, J. W. Ochterski, R. L. Martin, K. Morokuma, V. G. Zakrzewski, G. A. Voth, P. Salvador, J. J. Dannenberg, S. Dapprich, A. D. Daniels, O. Farkas, J. B. Foresman, J. V. Ortiz, J. Cioslowski and D. J. Fox, *Gaussian 16, Revision A.03*, Gaussian, Inc., Wallingford CT, 2016.
5. Y. Zhao and D. G. Truhlar, *Theor. Chem. Acc.* 2008, **120**, 215–241.
6. F. Weigend and R. Ahlrichs, *Phys. Chem. Chem. Phys.* 2005, **7**, 3297–3305.
7. J. W. McIver, and A. Komornic, *J. Am. Chem. Soc.* 1972, **94**, 2625–2633.
8. K. B. Wiberg, *Tetrahedron* 1968, **24**, 1083–1096.
9. (a) A. E. Reed and F. Weinhold, *J. Chem. Phys.* 1985, **83**, 1736–1740; (b) A. E. Reed, R. B. Weinstock and F. Weinhold, *J. Chem. Phys.* 1985, **83**, 735–746.
10. E. D. Glendening, A. E. Reed, J. E. Carpenter and F. Weinhold, NBO Version 3.1.
11. a) D. Geuenich, K. Hess, F. Koehler and R. Herges, *Chem. Rev.* 2005, **105**, 3758–3772; b) R. Herges and D. Geuenich, *J. Phys. Chem. A* 2001, **105**, 3214–3220.
12. F. Neese, *WIREs Comput. Mol. Sci.* 2017, **8**, e1327.
13. V. Barone and M. Cossi, *J. Phys. Chem. A* 1998, **102**, 1995–2001.
